# Supplementary material for: DNA-Methylation Profiling of Fetal Tissues Reveals Marked Epigenetic Differences between Chorionic and Amniotic Samples
Source: PLoS One. 2012 Jun 19;7(6):e39014. doi: 10.1371/journal.pone.0039014 (PMC3378600; doi:10.1371/journal.pone.0039014)
Supplement: Table S1 — Clinical characteristics of the samples included in the study. (XLS) [file pone.0039014.s006.xls]

## Sheet: Klinik
Cases	CVS/AC	fetal Karyotype	SSW	age (years)	Gravida	Para	Indication	Legend (column "Indication")
AC1	AC	46,XY	14+2	32	1	0	1	1: advanced maternal age (n= 43, 2 duplicates, 41 pregnancies)
AC2	AC	47,XY+18	13+0	39	1	0	1	2: suspicious first trimester screening (n= 24, 1 duplicate, 23 pregnancies)
AC3	AC	46,XY	16+2	37	1	0	1; 2	3: increased nuchal translucency (n= 4)
AC4	AC	46,XX	15+1	36	4	3	1	4: conspicuous family history (n= 5)
AC5	AC	46,XX	16+2	37	3	1	1	5: abormal ultrasound findings (n= 12)
AC6	AC	46,XX	16+0	39	5	1	1
AC7	AC	46,XX	28+2	25	3	1	5
AC8	AC	46,XY	15+3	38	3	2	1
AC9	AC	46,XY	17	37	4	3	1
AC10	AC	46,XX	16+5	37	7	5	1; 4
AC11	AC	46,XY	21+4	26	1	0	5
AC12	AC	46,XY	16+3	42	2	1	1
AC13	AC	46,XY	15+0	20	3	1	4; 5
AC14	AC	46,XY	18+0	17	1	0	5
AC15	AC	46,XY	22+1	28	1	0	5
AC16	AC	46,XX	15+6	39	2	1	1
CV1	CVS	46,XY	12+5	39	2	1	1; 2
CV2	CVS	47,XY+18	13+0	40	7	5	1; 2
CV3	CVS	46,XX	13+2	41	4	2	1
CV4	CVS	46,XY	13+4	37	1	0	1; 2
CV5	CVS	46,XX	12+4	36	2	1	1
CV6	CVS	46,XX	13+0	33	3	2	2
CV7	CVS	46,XY	12+4	34	3	1	2
CV8	CVS	46,XX	14+4	24	1	0	2
CV9	CVS	46,XY	12+2	38	3	1	1
CV10	CVS	46,XY	13+5	41	1	0	1; 2
CV11	CVS	46,XY	13+2	33	3	1	2
CV12	CVS	46,XX	13+0	37	4	3	1; 2
CV13	CVS	47,XX+18	12+6	32	4	2	2
CV14	CVS	46,XY	12+4	32	1	0	2
CV15	CVS	46,XY	13+5	37	2	1	1; 2
CV16	CVS	47,XX+18	11+3	43	6	5	1; 5
CV17	CVS	46,XX	13+1	44	4	3	1
CV18	CVS	46,XX	12+0	35	4	2	1; 4
CV19	CVS	47,XY,+18	11+4	31	2	0	2
CV20	CVS	47,XY,+21	11+2	35	2	1	1; 2
CV21	CVS	46,XY	12+1	41	3	2	1; 2
CV22	CVS	47,XY,+21	13	39	4	1	1; 3
CV23	CVS	45,X	11+6	21	2	0	2
CV24	CVS	47,XY,+21	12+3	41	2	1	1; 2
CV25	CVS	47,XY,+18	11+6	43	3	1	1; 5
CV26	CVS	46,XY	12	35	2	0	1; 3
CV27	CVS	46,XX	11+6	36	3	1	1; 5
CV28	CVS	46,XY	11	40	4	3	1; 2
4	CVS	46,XX	14	33	2	0	5
5	CVS	46,XY	12+3	35	2	1	1; 3
8	CVS	46,XY	13	27	1	0	5
9	CVS	46,XX	13	36	4	3	1; 5
10	CVS	46,XY	12	35	2	0	1; 3
12	CVS	46,XX	12+2	36	2	1	1
13	CVS	46,XY	12+2	33	2	1	4
14	CVS	46,XY	14+1	40	3	2	1
15	CVS	46,XX	13	40	1	0	1
16	CVS	46,XX	13	39	7	5	1
17	CVS	46,XX	12+5	25	1	0	5
18	CVS	46,XX	13+3	39	2	1	1; 2
19	CVS	46,XY	12+1	41	3	2	1; 2
20	CVS	46,XX	12+1	40	2	1	1
21	CVS	46,XY	13+3	30	4	2	2
22	CVS	46,XY	11+3	42	4	2	1
23	CVS	46,XY	13+1	34	4	1	4
24	CVS	46,XY	13+2	37	2	0	1; 2
26	CVS	46,XX	11+3	30	4	2	2
