# Supplementary material for: DNA-Methylation Profiling of Fetal Tissues Reveals Marked Epigenetic Differences between Chorionic and Amniotic Samples
Source: PLoS One. 2012 Jun 19;7(6):e39014. doi: 10.1371/journal.pone.0039014 (PMC3378600; doi:10.1371/journal.pone.0039014)
Supplement: Table S2 — Gene ontology terms (GO) significantly enriched in the group of genes differentially methylated between CVS and AC samples as compared to the entirety of loci present on the array (p<0.001, GOrilla tool: GOprocess). (XLS) [file pone.0039014.s007.xls]

## Sheet: GOPROCESS-CVSvsAC
GO Term	Description	P-value	Enrichment	N	B	n	b	Genes
GO:0032501	multicellular organismal process	4.02e-12	1.32	11755	2145	1853	446	[PKP1 - plakophilin 1 (ectodermal dysplasia/skin fragility syndrome), PLA2G2A - phospholipase a2, group iia (platelets, synovial fluid), COMT - catechol-o-methyltransferase, PLAT - plasminogen activator, tissue, PLAU - plasminogen activator, urokinase, LAMA5 - laminin, alpha 5, GAS6 - growth arrest-specific 6, EGFL7 - egf-like-domain, multiple 7, TBX4 - t-box 4, GATA4 - gata binding protein 4, PI…
GO:0003008	system process	1.58e-11	1.61	11755	681	1853	173	[HPS1 - hermansky-pudlak syndrome 1, CABP4 - calcium binding protein 4, SLC22A18 - solute carrier family 22, member 18, MYL2 - myosin, light chain 2, regulatory, cardiac, slow, FOXS1 - forkhead box s1, COMT - catechol-o-methyltransferase, MOGAT2 - monoacylglycerol o-acyltransferase 2, STRA6 - stimulated by retinoic acid gene 6 homolog (mouse), GRIN2D - glutamate receptor, ionotropic, n-methyl d-a…
GO:0007186	G-protein coupled receptor signaling pathway	3.67e-10	1.75	11755	409	1853	113	[CORT - cortistatin, SORCS1 - sortilin-related vps10 domain containing receptor 1, GRM4 - glutamate receptor, metabotropic 4, NTSR1 - neurotensin receptor 1 (high affinity), GRM3 - glutamate receptor, metabotropic 3, GRM2 - glutamate receptor, metabotropic 2, S1PR4 - sphingosine-1-phosphate receptor 4, GRIK3 - glutamate receptor, ionotropic, kainate 3, TAC3 - tachykinin 3, TACR2 - tachykinin rece…
GO:0050896	response to stimulus	5.36e-10	1.18	11755	4169	1853	774	[PKP1 - plakophilin 1 (ectodermal dysplasia/skin fragility syndrome), SORCS1 - sortilin-related vps10 domain containing receptor 1, PLA2G2A - phospholipase a2, group iia (platelets, synovial fluid), PLA2G5 - phospholipase a2, group v, AANAT - aralkylamine n-acetyltransferase, PLAU - plasminogen activator, urokinase, GAS6 - growth arrest-specific 6, GATA4 - gata binding protein 4, PITPNA - phospha…
ne-dna glycosylase, LHX9 - lim homeobox 9, ATP6V1E2 - atpase, h+ transporting, lysosomal 31kda, v1 subunit e2, NR2F6 - nuclear receptor subfamily 2, group f, member 6, KCNH6 - potassium voltage-gated channel, subfamily h (eag-related), member 6, MMP19 - matrix metallopeptidase 19, WNT5B - wingless-type mmtv integration site family, member 5b, EYA4 - eyes absent homolog 4 (drosophila), NCF1 - neut…
GO:0006952	defense response	6.78e-08	1.56	11755	521	1853	128	[TP73 - tumor protein p73, PLA2G2A - phospholipase a2, group iia (platelets, synovial fluid), ELANE - elastase, neutrophil expressed, ORM2 - orosomucoid 2, IL20RB - interleukin 20 receptor beta, IL23A - interleukin 23, alpha subunit p19, IL9 - interleukin 9, CXCR2 - chemokine (c-x-c motif) receptor 2, OAS1 - 2',5'-oligoadenylate synthetase 1, 40/46kda, PLA2G2E - phospholipase a2, group iie, CARD9…
GO:0007267	cell-cell signaling	8.2e-08	1.52	11755	579	1853	139	[CORT - cortistatin, RAPSN - receptor-associated protein of the synapse, NTSR1 - neurotensin receptor 1 (high affinity), GRM4 - glutamate receptor, metabotropic 4, GRM3 - glutamate receptor, metabotropic 3, GRM2 - glutamate receptor, metabotropic 2, COMT - catechol-o-methyltransferase, GRIK5 - glutamate receptor, ionotropic, kainate 5, GRIK3 - glutamate receptor, ionotropic, kainate 3, GRIN2D - g…
GO:0023052	signaling	1.76e-07	1.5	11755	586	1853	139	[CORT - cortistatin, RAPSN - receptor-associated protein of the synapse, NTSR1 - neurotensin receptor 1 (high affinity), GRM4 - glutamate receptor, metabotropic 4, GRM3 - glutamate receptor, metabotropic 3, GRM2 - glutamate receptor, metabotropic 2, COMT - catechol-o-methyltransferase, GRIK5 - glutamate receptor, ionotropic, kainate 5, GRIK3 - glutamate receptor, ionotropic, kainate 3, GRIN2D - g…
GO:0006955	immune response	2.38e-07	1.55	11755	491	1853	120	[ELANE - elastase, neutrophil expressed, S1PR4 - sphingosine-1-phosphate receptor 4, IL20RB - interleukin 20 receptor beta, IL23A - interleukin 23, alpha subunit p19, OSM - oncostatin m, SEMA4D - sema domain, immunoglobulin domain (ig), transmembrane domain (tm) and short cytoplasmic domain, (semaphorin) 4d, IL9 - interleukin 9, RAG1 - recombination activating gene 1, OAS1 - 2',5'-oligoadenylate …
GO:0007154	cell communication	3.37e-07	1.43	11755	740	1853	167	[RAPSN - receptor-associated protein of the synapse, CORT - cortistatin, NTSR1 - neurotensin receptor 1 (high affinity), GRM4 - glutamate receptor, metabotropic 4, ULK1 - unc-51-like kinase 1 (c. elegans), GRM3 - glutamate receptor, metabotropic 3, GRM2 - glutamate receptor, metabotropic 2, COMT - catechol-o-methyltransferase, GRIK5 - glutamate receptor, ionotropic, kainate 5, GRIK3 - glutamate r…
GO:0050877	neurological system process	4.26e-07	1.58	11755	435	1853	108	[CABP4 - calcium binding protein 4, HPS1 - hermansky-pudlak syndrome 1, FOXS1 - forkhead box s1, COMT - catechol-o-methyltransferase, STRA6 - stimulated by retinoic acid gene 6 homolog (mouse), GRIN2D - glutamate receptor, ionotropic, n-methyl d-aspartate 2d, GRIN2C - glutamate receptor, ionotropic, n-methyl d-aspartate 2c, RAX - retina and anterior neural fold homeobox, DBH - dopamine beta-hydro…
GO:0051339	regulation of lyase activity	5.72e-07	2.31	11755	96	1853	35	[CORT - cortistatin, GRM4 - glutamate receptor, metabotropic 4, GRM3 - glutamate receptor, metabotropic 3, CHRM4 - cholinergic receptor, muscarinic 4, S1PR4 - sphingosine-1-phosphate receptor 4, GRM2 - glutamate receptor, metabotropic 2, NOS3 - nitric oxide synthase 3 (endothelial cell), MCHR1 - melanin-concentrating hormone receptor 1, CRHR1 - corticotropin releasing hormone receptor 1, GRIK3 - …
GO:0031279	regulation of cyclase activity	7.68e-07	2.32	11755	93	1853	34	[CORT - cortistatin, GRM4 - glutamate receptor, metabotropic 4, GRM3 - glutamate receptor, metabotropic 3, CHRM4 - cholinergic receptor, muscarinic 4, S1PR4 - sphingosine-1-phosphate receptor 4, GRM2 - glutamate receptor, metabotropic 2, NOS3 - nitric oxide synthase 3 (endothelial cell), MCHR1 - melanin-concentrating hormone receptor 1, CRHR1 - corticotropin releasing hormone receptor 1, GRIK3 - …
GO:0030802	regulation of cyclic nucleotide biosynthetic process	8.8e-07	2.17	11755	114	1853	39	[RAMP2 - receptor (g protein-coupled) activity modifying protein 2, CORT - cortistatin, GRM4 - glutamate receptor, metabotropic 4, GRM3 - glutamate receptor, metabotropic 3, CHRM4 - cholinergic receptor, muscarinic 4, GRM2 - glutamate receptor, metabotropic 2, S1PR4 - sphingosine-1-phosphate receptor 4, NOS3 - nitric oxide synthase 3 (endothelial cell), MCHR1 - melanin-concentrating hormone recep…
GO:0030808	regulation of nucleotide biosynthetic process	1.13e-06	2.15	11755	115	1853	39	[RAMP2 - receptor (g protein-coupled) activity modifying protein 2, CORT - cortistatin, GRM4 - glutamate receptor, metabotropic 4, GRM3 - glutamate receptor, metabotropic 3, CHRM4 - cholinergic receptor, muscarinic 4, S1PR4 - sphingosine-1-phosphate receptor 4, GRM2 - glutamate receptor, metabotropic 2, NOS3 - nitric oxide synthase 3 (endothelial cell), MCHR1 - melanin-concentrating hormone recep…
GO:0019935	cyclic-nucleotide-mediated signaling	1.21e-06	2.08	11755	128	1853	42	[CORT - cortistatin, GRM4 - glutamate receptor, metabotropic 4, GRM3 - glutamate receptor, metabotropic 3, CHRM4 - cholinergic receptor, muscarinic 4, GRM2 - glutamate receptor, metabotropic 2, S1PR4 - sphingosine-1-phosphate receptor 4, EPHA5 - eph receptor a5, MCHR1 - melanin-concentrating hormone receptor 1, ADRA1B - adrenergic, alpha-1b-, receptor, CRHR1 - corticotropin releasing hormone rece…
GO:0030817	regulation of cAMP biosynthetic process	1.24e-06	2.19	11755	107	1853	37	[RAMP2 - receptor (g protein-coupled) activity modifying protein 2, CORT - cortistatin, GRM4 - glutamate receptor, metabotropic 4, GRM3 - glutamate receptor, metabotropic 3, CHRM4 - cholinergic receptor, muscarinic 4, S1PR4 - sphingosine-1-phosphate receptor 4, GRM2 - glutamate receptor, metabotropic 2, MCHR1 - melanin-concentrating hormone receptor 1, CRHR1 - corticotropin releasing hormone rece…
GO:0045761	regulation of adenylate cyclase activity	1.37e-06	2.3	11755	91	1853	33	[CORT - cortistatin, GRM4 - glutamate receptor, metabotropic 4, GRM3 - glutamate receptor, metabotropic 3, CHRM4 - cholinergic receptor, muscarinic 4, S1PR4 - sphingosine-1-phosphate receptor 4, GRM2 - glutamate receptor, metabotropic 2, MCHR1 - melanin-concentrating hormone receptor 1, CRHR1 - corticotropin releasing hormone receptor 1, GRIK3 - glutamate receptor, ionotropic, kainate 3, NF1 - ne…
GO:0019933	cAMP-mediated signaling	1.73e-06	2.22	11755	100	1853	35	[CORT - cortistatin, GRM4 - glutamate receptor, metabotropic 4, GRM3 - glutamate receptor, metabotropic 3, CHRM4 - cholinergic receptor, muscarinic 4, GRM2 - glutamate receptor, metabotropic 2, S1PR4 - sphingosine-1-phosphate receptor 4, EPHA5 - eph receptor a5, MCHR1 - melanin-concentrating hormone receptor 1, ADRA1B - adrenergic, alpha-1b-, receptor, CRHR1 - corticotropin releasing hormone rece…
GO:0007188	G-protein signaling, coupled to cAMP nucleotide second messenger	1.82e-06	2.28	11755	92	1853	33	[CORT - cortistatin, GRM4 - glutamate receptor, metabotropic 4, CHRM4 - cholinergic receptor, muscarinic 4, GRM3 - glutamate receptor, metabotropic 3, S1PR4 - sphingosine-1-phosphate receptor 4, GRM2 - glutamate receptor, metabotropic 2, ADRA1B - adrenergic, alpha-1b-, receptor, MCHR1 - melanin-concentrating hormone receptor 1, CRHR1 - corticotropin releasing hormone receptor 1, GRIK3 - glutamate…
GO:0019932	second-messenger-mediated signaling	1.88e-06	1.86	11755	188	1853	55	[CORT - cortistatin, GRM4 - glutamate receptor, metabotropic 4, GRM3 - glutamate receptor, metabotropic 3, CHRM4 - cholinergic receptor, muscarinic 4, S1PR4 - sphingosine-1-phosphate receptor 4, GRM2 - glutamate receptor, metabotropic 2, ADRA1B - adrenergic, alpha-1b-, receptor, CHRM1 - cholinergic receptor, muscarinic 1, GRIK3 - glutamate receptor, ionotropic, kainate 3, GNA15 - guanine nucleoti…
GO:0030814	regulation of cAMP metabolic process	2.06e-06	2.15	11755	109	1853	37	[RAMP2 - receptor (g protein-coupled) activity modifying protein 2, CORT - cortistatin, GRM4 - glutamate receptor, metabotropic 4, GRM3 - glutamate receptor, metabotropic 3, CHRM4 - cholinergic receptor, muscarinic 4, GRM2 - glutamate receptor, metabotropic 2, S1PR4 - sphingosine-1-phosphate receptor 4, MCHR1 - melanin-concentrating hormone receptor 1, CRHR1 - corticotropin releasing hormone rece…
GO:0007187	G-protein signaling, coupled to cyclic nucleotide second messenger	2.34e-06	2.1	11755	118	1853	39	[CORT - cortistatin, GRM4 - glutamate receptor, metabotropic 4, GRM3 - glutamate receptor, metabotropic 3, CHRM4 - cholinergic receptor, muscarinic 4, S1PR4 - sphingosine-1-phosphate receptor 4, GRM2 - glutamate receptor, metabotropic 2, MCHR1 - melanin-concentrating hormone receptor 1, ADRA1B - adrenergic, alpha-1b-, receptor, CRHR1 - corticotropin releasing hormone receptor 1, GRIK3 - glutamate…
GO:0007601	visual perception	3.39e-06	1.99	11755	137	1853	43	[HPS1 - hermansky-pudlak syndrome 1, CABP4 - calcium binding protein 4, IRX5 - iroquois homeobox 5, PAX6 - paired box 6, RAX - retina and anterior neural fold homeobox, GUCY2D - guanylate cyclase 2d, membrane (retina-specific), GJA3 - gap junction protein, alpha 3, 46kda, TULP2 - tubby like protein 2, TIMP3 - timp metallopeptidase inhibitor 3, GNAT2 - guanine nucleotide binding protein (g protein…
GO:0030799	regulation of cyclic nucleotide metabolic process	3.73e-06	2.06	11755	120	1853	39	[RAMP2 - receptor (g protein-coupled) activity modifying protein 2, CORT - cortistatin, GRM4 - glutamate receptor, metabotropic 4, GRM3 - glutamate receptor, metabotropic 3, CHRM4 - cholinergic receptor, muscarinic 4, S1PR4 - sphingosine-1-phosphate receptor 4, GRM2 - glutamate receptor, metabotropic 2, NOS3 - nitric oxide synthase 3 (endothelial cell), MCHR1 - melanin-concentrating hormone recep…
GO:0050953	sensory perception of light stimulus	6.32e-06	1.95	11755	140	1853	43	[CABP4 - calcium binding protein 4, HPS1 - hermansky-pudlak syndrome 1, IRX5 - iroquois homeobox 5, PAX6 - paired box 6, RAX - retina and anterior neural fold homeobox, GUCY2D - guanylate cyclase 2d, membrane (retina-specific), GJA3 - gap junction protein, alpha 3, 46kda, TULP2 - tubby like protein 2, TIMP3 - timp metallopeptidase inhibitor 3, GNAT2 - guanine nucleotide binding protein (g protein…
GO:0051349	positive regulation of lyase activity	1.82e-05	2.49	11755	56	1853	22	[GALR1 - galanin receptor 1, ADCY4 - adenylate cyclase 4, ADCYAP1 - adenylate cyclase activating polypeptide 1 (pituitary), ADCY7 - adenylate cyclase 7, FTMT - ferritin mitochondrial, S1PR4 - sphingosine-1-phosphate receptor 4, NOS3 - nitric oxide synthase 3 (endothelial cell), HTR4 - 5-hydroxytryptamine (serotonin) receptor 4, ACR - acrosin, CRHR1 - corticotropin releasing hormone receptor 1, NF…
GO:0006140	regulation of nucleotide metabolic process	1.92e-05	1.59	11755	295	1853	74	[UHRF1 - ubiquitin-like with phd and ring finger domains 1, CORT - cortistatin, GRM4 - glutamate receptor, metabotropic 4, CHRM4 - cholinergic receptor, muscarinic 4, GRM3 - glutamate receptor, metabotropic 3, S1PR4 - sphingosine-1-phosphate receptor 4, GRM2 - glutamate receptor, metabotropic 2, ARHGAP15 - rho gtpase activating protein 15, GRIK3 - glutamate receptor, ionotropic, kainate 3, NF1 - …
GO:0055085	transmembrane transport	1.96e-05	1.41	11755	582	1853	129	[SLC22A18 - solute carrier family 22, member 18, SLC29A3 - solute carrier family 29 (nucleoside transporters), member 3, PRKAR1B - protein kinase, camp-dependent, regulatory, type i, beta, SLC17A4 - solute carrier family 17 (sodium phosphate), member 4, GRIN2C - glutamate receptor, ionotropic, n-methyl d-aspartate 2c, SLC25A31 - solute carrier family 25 (mitochondrial carrier; adenine nucleotide …
GO:0032101	regulation of response to external stimulus	3.01e-05	1.65	11755	234	1853	61	[ELANE - elastase, neutrophil expressed, PLA2G2A - phospholipase a2, group iia (platelets, synovial fluid), IL20RB - interleukin 20 receptor beta, IL23A - interleukin 23, alpha subunit p19, PLAT - plasminogen activator, tissue, RARRES2 - retinoic acid receptor responder (tazarotene induced) 2, PLAU - plasminogen activator, urokinase, OSM - oncostatin m, PDGFRB - platelet-derived growth factor rec…
GO:0072376	protein activation cascade	3.33e-05	2.77	11755	39	1853	17	[C8G - complement component 8, gamma polypeptide, FCN3 - ficolin (collagen/fibrinogen domain containing) 3 (hakata antigen), FCN2 - ficolin (collagen/fibrinogen domain containing lectin) 2 (hucolin), C1RL - complement component 1, r subcomponent-like, CFB - complement factor b, GP1BA - glycoprotein ib (platelet), alpha polypeptide, C1QA - complement component 1, q subcomponent, a chain, GP1BB - g…
GO:0031281	positive regulation of cyclase activity	3.36e-05	2.47	11755	54	1853	21	[GALR1 - galanin receptor 1, ADCY4 - adenylate cyclase 4, ADCYAP1 - adenylate cyclase activating polypeptide 1 (pituitary), ADCY7 - adenylate cyclase 7, S1PR4 - sphingosine-1-phosphate receptor 4, NOS3 - nitric oxide synthase 3 (endothelial cell), HTR4 - 5-hydroxytryptamine (serotonin) receptor 4, ACR - acrosin, CRHR1 - corticotropin releasing hormone receptor 1, NF1 - neurofibromin 1, GLP1R - gl…
GO:0007268	synaptic transmission	3.41e-05	1.51	11755	361	1853	86	[RAPSN - receptor-associated protein of the synapse, CORT - cortistatin, KCNJ1 - potassium inwardly-rectifying channel, subfamily j, member 1, NTSR1 - neurotensin receptor 1 (high affinity), GRM4 - glutamate receptor, metabotropic 4, CHRM4 - cholinergic receptor, muscarinic 4, GRM3 - glutamate receptor, metabotropic 3, GRM2 - glutamate receptor, metabotropic 2, HCN1 - hyperpolarization activated …
GO:0007600	sensory perception	4.59e-05	1.57	11755	282	1853	70	[HPS1 - hermansky-pudlak syndrome 1, CABP4 - calcium binding protein 4, KCNE1 - potassium voltage-gated channel, isk-related family, member 1, RAX - retina and anterior neural fold homeobox, DBH - dopamine beta-hydroxylase (dopamine beta-monooxygenase), GNAS - gnas complex locus, TULP2 - tubby like protein 2, GNAT2 - guanine nucleotide binding protein (g protein), alpha transducing activity polyp…
GO:0002682	regulation of immune system process	5.64e-05	1.37	11755	611	1853	132	[APC - adenomatous polyposis coli, HPS1 - hermansky-pudlak syndrome 1, ELANE - elastase, neutrophil expressed, TIGIT - t cell immunoreceptor with ig and itim domains, ORM2 - orosomucoid 2, IL20RB - interleukin 20 receptor beta, IL23A - interleukin 23, alpha subunit p19, TNFRSF13B - tumor necrosis factor receptor superfamily, member 13b, RARRES2 - retinoic acid receptor responder (tazarotene induc…
GO:0007565	female pregnancy	6.33e-05	2.38	11755	56	1853	21	[LEP - leptin, RLN1 - relaxin 1, ADCYAP1 - adenylate cyclase activating polypeptide 1 (pituitary), COMT - catechol-o-methyltransferase, CRHR1 - corticotropin releasing hormone receptor 1, MMP3 - matrix metallopeptidase 3 (stromelysin 1, progelatinase), CD38 - cd38 molecule, CRHBP - corticotropin releasing hormone binding protein, TAC3 - tachykinin 3, GNAS - gnas complex locus, FCGRT - fc fragment…
GO:0022610	biological adhesion	8.44e-05	1.39	11755	540	1853	118	[APC - adenomatous polyposis coli, PKP1 - plakophilin 1 (ectodermal dysplasia/skin fragility syndrome), LAMA5 - laminin, alpha 5, SEMA4D - sema domain, immunoglobulin domain (ig), transmembrane domain (tm) and short cytoplasmic domain, (semaphorin) 4d, APLP1 - amyloid beta (a4) precursor-like protein 1, CD44 - cd44 molecule (indian blood group), SIGLEC9 - sialic acid binding ig-like lectin 9, BRC…
GO:0007155	cell adhesion	8.44e-05	1.39	11755	540	1853	118	[APC - adenomatous polyposis coli, PKP1 - plakophilin 1 (ectodermal dysplasia/skin fragility syndrome), LAMA5 - laminin, alpha 5, SEMA4D - sema domain, immunoglobulin domain (ig), transmembrane domain (tm) and short cytoplasmic domain, (semaphorin) 4d, APLP1 - amyloid beta (a4) precursor-like protein 1, CD44 - cd44 molecule (indian blood group), SIGLEC9 - sialic acid binding ig-like lectin 9, BRC…
GO:0030818	negative regulation of cAMP biosynthetic process	8.49e-05	2.39	11755	53	1853	20	[NPR3 - natriuretic peptide receptor c/guanylate cyclase c (atrionatriuretic peptide receptor c), GALR1 - galanin receptor 1, CORT - cortistatin, ADCY4 - adenylate cyclase 4, HTR1B - 5-hydroxytryptamine (serotonin) receptor 1b, ADCY7 - adenylate cyclase 7, GRM4 - glutamate receptor, metabotropic 4, GRM3 - glutamate receptor, metabotropic 3, CHRM4 - cholinergic receptor, muscarinic 4, GRM2 - gluta…
GO:0030815	negative regulation of cAMP metabolic process	8.49e-05	2.39	11755	53	1853	20	[NPR3 - natriuretic peptide receptor c/guanylate cyclase c (atrionatriuretic peptide receptor c), GALR1 - galanin receptor 1, CORT - cortistatin, ADCY4 - adenylate cyclase 4, HTR1B - 5-hydroxytryptamine (serotonin) receptor 1b, ADCY7 - adenylate cyclase 7, GRM4 - glutamate receptor, metabotropic 4, GRM3 - glutamate receptor, metabotropic 3, CHRM4 - cholinergic receptor, muscarinic 4, GRM2 - gluta…
GO:0045762	positive regulation of adenylate cyclase activity	8.49e-05	2.39	11755	53	1853	20	[GALR1 - galanin receptor 1, ADCY4 - adenylate cyclase 4, ADCYAP1 - adenylate cyclase activating polypeptide 1 (pituitary), ADCY7 - adenylate cyclase 7, S1PR4 - sphingosine-1-phosphate receptor 4, HTR4 - 5-hydroxytryptamine (serotonin) receptor 4, ACR - acrosin, CRHR1 - corticotropin releasing hormone receptor 1, NF1 - neurofibromin 1, GLP1R - glucagon-like peptide 1 receptor, ADORA2A - adenosine…
GO:0007196	inhibition of adenylate cyclase activity by G-protein coupled glutamate receptor signaling pathway	9.69e-05	6.34	11755	5	1853	5	[GRM4 - glutamate receptor, metabotropic 4, GRM3 - glutamate receptor, metabotropic 3, GRM2 - glutamate receptor, metabotropic 2, GRM8 - glutamate receptor, metabotropic 8, GRIK3 - glutamate receptor, ionotropic, kainate 3]
GO:0046549	retinal cone cell development	9.69e-05	6.34	11755	5	1853	5	[CABP4 - calcium binding protein 4, GNAT2 - guanine nucleotide binding protein (g protein), alpha transducing activity polypeptide 2, HCN1 - hyperpolarization activated cyclic nucleotide-gated potassium channel 1, THY1 - thy-1 cell surface antigen, CNGA3 - cyclic nucleotide gated channel alpha 3]
GO:0048545	response to steroid hormone stimulus	9.75e-05	1.57	11755	258	1853	64	[PSPH - phosphoserine phosphatase, AANAT - aralkylamine n-acetyltransferase, PRDM2 - pr domain containing 2, with znf domain, DBH - dopamine beta-hydroxylase (dopamine beta-monooxygenase), CASP6 - caspase 6, apoptosis-related cysteine peptidase, BRCA2 - breast cancer 2, early onset, UGT1A1 - udp glucuronosyltransferase 1 family, polypeptide a1, NR1H3 - nuclear receptor subfamily 1, group h, membe…
GO:0007193	inhibition of adenylate cyclase activity by G-protein signaling pathway	0.000104	2.57	11755	42	1853	17	[NPR3 - natriuretic peptide receptor c/guanylate cyclase c (atrionatriuretic peptide receptor c), CORT - cortistatin, ADCY4 - adenylate cyclase 4, ADCY7 - adenylate cyclase 7, GRM4 - glutamate receptor, metabotropic 4, GRM3 - glutamate receptor, metabotropic 3, CHRM4 - cholinergic receptor, muscarinic 4, GRM2 - glutamate receptor, metabotropic 2, MCHR1 - melanin-concentrating hormone receptor 1, …
GO:0007166	cell surface receptor linked signaling pathway	0.000105	1.22	11755	1396	1853	269	[CORT - cortistatin, SORCS1 - sortilin-related vps10 domain containing receptor 1, S1PR4 - sphingosine-1-phosphate receptor 4, TNFRSF13B - tumor necrosis factor receptor superfamily, member 13b, LAMA5 - laminin, alpha 5, QRFP - pyroglutamylated rfamide peptide, NR1H3 - nuclear receptor subfamily 1, group h, member 3, GATA4 - gata binding protein 4, MYH6 - myosin, heavy chain 6, cardiac muscle, al…
GO:0051707	response to other organism	0.00011	1.62	11755	219	1853	56	[IL27 - interleukin 27, CAMP - cathelicidin antimicrobial peptide, ELANE - elastase, neutrophil expressed, PLA2G2A - phospholipase a2, group iia (platelets, synovial fluid), MST1R - macrophage stimulating 1 receptor (c-met-related tyrosine kinase), IL23A - interleukin 23, alpha subunit p19, LTF - lactotransferrin, DEFB103A - defensin, beta 103a, CHIT1 - chitinase 1 (chitotriosidase), OAS1 - 2',5'…
GO:0031280	negative regulation of cyclase activity	0.000114	2.41	11755	50	1853	19	[NPR3 - natriuretic peptide receptor c/guanylate cyclase c (atrionatriuretic peptide receptor c), GALR1 - galanin receptor 1, CORT - cortistatin, ADCY4 - adenylate cyclase 4, ADCY7 - adenylate cyclase 7, GRM4 - glutamate receptor, metabotropic 4, GRM3 - glutamate receptor, metabotropic 3, CHRM4 - cholinergic receptor, muscarinic 4, GRM2 - glutamate receptor, metabotropic 2, MCHR1 - melanin-concen…
GO:0007194	negative regulation of adenylate cyclase activity	0.000114	2.41	11755	50	1853	19	[NPR3 - natriuretic peptide receptor c/guanylate cyclase c (atrionatriuretic peptide receptor c), GALR1 - galanin receptor 1, CORT - cortistatin, ADCY4 - adenylate cyclase 4, ADCY7 - adenylate cyclase 7, GRM4 - glutamate receptor, metabotropic 4, GRM3 - glutamate receptor, metabotropic 3, CHRM4 - cholinergic receptor, muscarinic 4, GRM2 - glutamate receptor, metabotropic 2, MCHR1 - melanin-concen…
GO:0030800	negative regulation of cyclic nucleotide metabolic process	0.000115	2.35	11755	54	1853	20	[NPR3 - natriuretic peptide receptor c/guanylate cyclase c (atrionatriuretic peptide receptor c), GALR1 - galanin receptor 1, CORT - cortistatin, ADCY4 - adenylate cyclase 4, HTR1B - 5-hydroxytryptamine (serotonin) receptor 1b, ADCY7 - adenylate cyclase 7, GRM4 - glutamate receptor, metabotropic 4, GRM3 - glutamate receptor, metabotropic 3, CHRM4 - cholinergic receptor, muscarinic 4, GRM2 - gluta…
GO:0030803	negative regulation of cyclic nucleotide biosynthetic process	0.000115	2.35	11755	54	1853	20	[NPR3 - natriuretic peptide receptor c/guanylate cyclase c (atrionatriuretic peptide receptor c), GALR1 - galanin receptor 1, CORT - cortistatin, ADCY4 - adenylate cyclase 4, HTR1B - 5-hydroxytryptamine (serotonin) receptor 1b, ADCY7 - adenylate cyclase 7, GRM4 - glutamate receptor, metabotropic 4, GRM3 - glutamate receptor, metabotropic 3, CHRM4 - cholinergic receptor, muscarinic 4, GRM2 - gluta…
GO:0009607	response to biotic stimulus	0.000146	1.47	11755	349	1853	81	[IL27 - interleukin 27, CAMP - cathelicidin antimicrobial peptide, ELANE - elastase, neutrophil expressed, PLA2G2A - phospholipase a2, group iia (platelets, synovial fluid), MST1R - macrophage stimulating 1 receptor (c-met-related tyrosine kinase), COMT - catechol-o-methyltransferase, IL23A - interleukin 23, alpha subunit p19, LTF - lactotransferrin, CHIT1 - chitinase 1 (chitotriosidase), DEFB103…
GO:0044057	regulation of system process	0.000146	1.49	11755	323	1853	76	[MYL2 - myosin, light chain 2, regulatory, cardiac, slow, CHRM3 - cholinergic receptor, muscarinic 3, MYL5 - myosin, light chain 5, regulatory, GRM3 - glutamate receptor, metabotropic 3, ADRA1A - adrenergic, alpha-1a-, receptor, KCNE1 - potassium voltage-gated channel, isk-related family, member 1, ADRA1B - adrenergic, alpha-1b-, receptor, GRIK3 - glutamate receptor, ionotropic, kainate 3, NF1 - …
GO:0030809	negative regulation of nucleotide biosynthetic process	0.000154	2.31	11755	55	1853	20	[NPR3 - natriuretic peptide receptor c/guanylate cyclase c (atrionatriuretic peptide receptor c), GALR1 - galanin receptor 1, CORT - cortistatin, ADCY4 - adenylate cyclase 4, HTR1B - 5-hydroxytryptamine (serotonin) receptor 1b, ADCY7 - adenylate cyclase 7, GRM4 - glutamate receptor, metabotropic 4, GRM3 - glutamate receptor, metabotropic 3, CHRM4 - cholinergic receptor, muscarinic 4, GRM2 - gluta…
GO:0051350	negative regulation of lyase activity	0.000155	2.36	11755	51	1853	19	[NPR3 - natriuretic peptide receptor c/guanylate cyclase c (atrionatriuretic peptide receptor c), GALR1 - galanin receptor 1, CORT - cortistatin, ADCY4 - adenylate cyclase 4, ADCY7 - adenylate cyclase 7, GRM4 - glutamate receptor, metabotropic 4, GRM3 - glutamate receptor, metabotropic 3, CHRM4 - cholinergic receptor, muscarinic 4, GRM2 - glutamate receptor, metabotropic 2, MCHR1 - melanin-concen…
GO:0009617	response to bacterium	0.000173	2.02	11755	85	1853	27	[IL27 - interleukin 27, CAMP - cathelicidin antimicrobial peptide, SPN - sialophorin, PLA2G2A - phospholipase a2, group iia (platelets, synovial fluid), NOS2 - nitric oxide synthase 2, inducible, CEBPE - ccaat/enhancer binding protein (c/ebp), epsilon, IL23A - interleukin 23, alpha subunit p19, AZU1 - azurocidin 1, LTF - lactotransferrin, PRG2 - proteoglycan 2, bone marrow (natural killer cell ac…
GO:0042044	fluid transport	0.000179	2.64	11755	36	1853	15	[PRKACG - protein kinase, camp-dependent, catalytic, gamma, ADCY4 - adenylate cyclase 4, AQP1 - aquaporin 1 (colton blood group), AQP4 - aquaporin 4, ADCY7 - adenylate cyclase 7, PRKAR1B - protein kinase, camp-dependent, regulatory, type i, beta, AQP7 - aquaporin 7, SLC4A11 - solute carrier family 4, sodium borate transporter, member 11, CSF2 - colony stimulating factor 2 (granulocyte-macrophage)…
GO:0002376	immune system process	0.000189	1.28	11755	873	1853	176	[APC - adenomatous polyposis coli, ELANE - elastase, neutrophil expressed, S1PR4 - sphingosine-1-phosphate receptor 4, IL20RB - interleukin 20 receptor beta, IL23A - interleukin 23, alpha subunit p19, PSMF1 - proteasome (prosome, macropain) inhibitor subunit 1 (pi31), TNFRSF13B - tumor necrosis factor receptor superfamily, member 13b, OSM - oncostatin m, SEMA4D - sema domain, immunoglobulin domai…
GO:0007190	activation of adenylate cyclase activity	0.000208	2.32	11755	52	1853	19	[GALR1 - galanin receptor 1, ADCY4 - adenylate cyclase 4, ADCYAP1 - adenylate cyclase activating polypeptide 1 (pituitary), ADCY7 - adenylate cyclase 7, S1PR4 - sphingosine-1-phosphate receptor 4, HTR4 - 5-hydroxytryptamine (serotonin) receptor 4, ACR - acrosin, CRHR1 - corticotropin releasing hormone receptor 1, GLP1R - glucagon-like peptide 1 receptor, ADORA2A - adenosine a2a receptor, GNAS - g…
GO:0042221	response to chemical stimulus	0.000212	1.18	11755	1840	1853	342	[TP73 - tumor protein p73, ELANE - elastase, neutrophil expressed, PLA2G5 - phospholipase a2, group v, COMT - catechol-o-methyltransferase, AANAT - aralkylamine n-acetyltransferase, PLAU - plasminogen activator, urokinase, BRCA2 - breast cancer 2, early onset, NR1H3 - nuclear receptor subfamily 1, group h, member 3, UGT1A1 - udp glucuronosyltransferase 1 family, polypeptide a1, BRCA1 - breast can…
GO:0030804	positive regulation of cyclic nucleotide biosynthetic process	0.000232	2.11	11755	69	1853	23	[RAMP2 - receptor (g protein-coupled) activity modifying protein 2, MC3R - melanocortin 3 receptor, GALR1 - galanin receptor 1, ADCY4 - adenylate cyclase 4, ADCYAP1 - adenylate cyclase activating polypeptide 1 (pituitary), ADCY7 - adenylate cyclase 7, S1PR4 - sphingosine-1-phosphate receptor 4, HTR4 - 5-hydroxytryptamine (serotonin) receptor 4, ACR - acrosin, CRHR1 - corticotropin releasing hormo…
GO:0006936	muscle contraction	0.000256	1.78	11755	128	1853	36	[CACNA1H - calcium channel, voltage-dependent, t type, alpha 1h subunit, ADRA1A - adrenergic, alpha-1a-, receptor, KCNE1 - potassium voltage-gated channel, isk-related family, member 1, TACR2 - tachykinin receptor 2, CALM3 - calmodulin 3 (phosphorylase kinase, delta), MYL6B - myosin, light chain 6b, alkali, smooth muscle and non-muscle, TCAP - titin-cap (telethonin), LMOD1 - leiomodin 1 (smooth m…
GO:0045980	negative regulation of nucleotide metabolic process	0.000269	2.23	11755	57	1853	20	[NPR3 - natriuretic peptide receptor c/guanylate cyclase c (atrionatriuretic peptide receptor c), GALR1 - galanin receptor 1, CORT - cortistatin, ADCY4 - adenylate cyclase 4, HTR1B - 5-hydroxytryptamine (serotonin) receptor 1b, ADCY7 - adenylate cyclase 7, GRM4 - glutamate receptor, metabotropic 4, GRM3 - glutamate receptor, metabotropic 3, CHRM4 - cholinergic receptor, muscarinic 4, GRM2 - gluta…
GO:0030810	positive regulation of nucleotide biosynthetic process	0.000294	2.08	11755	70	1853	23	[RAMP2 - receptor (g protein-coupled) activity modifying protein 2, GALR1 - galanin receptor 1, MC3R - melanocortin 3 receptor, ADCY4 - adenylate cyclase 4, ADCYAP1 - adenylate cyclase activating polypeptide 1 (pituitary), ADCY7 - adenylate cyclase 7, S1PR4 - sphingosine-1-phosphate receptor 4, HTR4 - 5-hydroxytryptamine (serotonin) receptor 4, ACR - acrosin, CRHR1 - corticotropin releasing hormo…
GO:0042742	defense response to bacterium	0.000294	2.08	11755	70	1853	23	[WFDC12 - wap four-disulfide core domain 12, CAMP - cathelicidin antimicrobial peptide, PLA2G2A - phospholipase a2, group iia (platelets, synovial fluid), SPN - sialophorin, NOS2 - nitric oxide synthase 2, inducible, CEBPE - ccaat/enhancer binding protein (c/ebp), epsilon, AZU1 - azurocidin 1, IL23A - interleukin 23, alpha subunit p19, LTF - lactotransferrin, H2BFS - h2b histone family, member s,…
GO:0051049	regulation of transport	0.000297	1.31	11755	689	1853	142	[PRKAR1B - protein kinase, camp-dependent, regulatory, type i, beta, IL23A - interleukin 23, alpha subunit p19, OSM - oncostatin m, OXCT1 - 3-oxoacid coa transferase 1, NR1H3 - nuclear receptor subfamily 1, group h, member 3, GREM1 - gremlin 1, P2RX1 - purinergic receptor p2x, ligand-gated ion channel, 1, P2RX3 - purinergic receptor p2x, ligand-gated ion channel, 3, GRM7 - glutamate receptor, met…
GO:0003012	muscle system process	0.000301	1.71	11755	148	1853	40	[CACNA1H - calcium channel, voltage-dependent, t type, alpha 1h subunit, NOS3 - nitric oxide synthase 3 (endothelial cell), ADRA1A - adrenergic, alpha-1a-, receptor, KCNE1 - potassium voltage-gated channel, isk-related family, member 1, CALM3 - calmodulin 3 (phosphorylase kinase, delta), TACR2 - tachykinin receptor 2, MYL6B - myosin, light chain 6b, alkali, smooth muscle and non-muscle, TCAP - ti…
GO:0030819	positive regulation of cAMP biosynthetic process	0.000315	2.11	11755	66	1853	22	[RAMP2 - receptor (g protein-coupled) activity modifying protein 2, GALR1 - galanin receptor 1, MC3R - melanocortin 3 receptor, ADCY4 - adenylate cyclase 4, ADCYAP1 - adenylate cyclase activating polypeptide 1 (pituitary), ADCY7 - adenylate cyclase 7, S1PR4 - sphingosine-1-phosphate receptor 4, HTR4 - 5-hydroxytryptamine (serotonin) receptor 4, ACR - acrosin, CRHR1 - corticotropin releasing hormo…
GO:0030816	positive regulation of cAMP metabolic process	0.000315	2.11	11755	66	1853	22	[RAMP2 - receptor (g protein-coupled) activity modifying protein 2, GALR1 - galanin receptor 1, MC3R - melanocortin 3 receptor, ADCY4 - adenylate cyclase 4, ADCYAP1 - adenylate cyclase activating polypeptide 1 (pituitary), ADCY7 - adenylate cyclase 7, S1PR4 - sphingosine-1-phosphate receptor 4, HTR4 - 5-hydroxytryptamine (serotonin) receptor 4, ACR - acrosin, CRHR1 - corticotropin releasing hormo…
GO:0007216	G-protein coupled glutamate receptor signaling pathway	0.00032	4.76	11755	8	1853	6	[GRM4 - glutamate receptor, metabotropic 4, GRM3 - glutamate receptor, metabotropic 3, GRM2 - glutamate receptor, metabotropic 2, GRM8 - glutamate receptor, metabotropic 8, GRIK3 - glutamate receptor, ionotropic, kainate 3, GRM6 - glutamate receptor, metabotropic 6]
GO:0032502	developmental process	0.000359	1.13	11755	2828	1853	504	[PKP1 - plakophilin 1 (ectodermal dysplasia/skin fragility syndrome), ONECUT2 - one cut homeobox 2, LAMA4 - laminin, alpha 4, PLAU - plasminogen activator, urokinase, LAMA5 - laminin, alpha 5, LHX3 - lim homeobox 3, LCE5A - late cornified envelope 5a, KRT83 - keratin 83, EGFL7 - egf-like-domain, multiple 7, CYP46A1 - cytochrome p450, family 46, subfamily a, polypeptide 1, TBX4 - t-box 4, GATA4 - …
GO:0030801	positive regulation of cyclic nucleotide metabolic process	0.000371	2.06	11755	71	1853	23	[RAMP2 - receptor (g protein-coupled) activity modifying protein 2, GALR1 - galanin receptor 1, MC3R - melanocortin 3 receptor, ADCY4 - adenylate cyclase 4, ADCYAP1 - adenylate cyclase activating polypeptide 1 (pituitary), ADCY7 - adenylate cyclase 7, S1PR4 - sphingosine-1-phosphate receptor 4, HTR4 - 5-hydroxytryptamine (serotonin) receptor 4, ACR - acrosin, CRHR1 - corticotropin releasing hormo…
GO:0048265	response to pain	0.000372	3.17	11755	20	1853	10	[DBH - dopamine beta-hydroxylase (dopamine beta-monooxygenase), GJA4 - gap junction protein, alpha 4, 37kda, P2RX3 - purinergic receptor p2x, ligand-gated ion channel, 3, COMT - catechol-o-methyltransferase, CRHR1 - corticotropin releasing hormone receptor 1, CALCA - calcitonin-related polypeptide alpha, OSM - oncostatin m, TSPO - translocator protein (18kda), NMUR2 - neuromedin u receptor 2, CAC…
GO:0048878	chemical homeostasis	0.000375	1.36	11755	488	1853	105	[ELANE - elastase, neutrophil expressed, S1PR4 - sphingosine-1-phosphate receptor 4, GRIK5 - glutamate receptor, ionotropic, kainate 5, OTC - ornithine carbamoyltransferase, GRIK3 - glutamate receptor, ionotropic, kainate 3, GRIN2C - glutamate receptor, ionotropic, n-methyl d-aspartate 2c, DBH - dopamine beta-hydroxylase (dopamine beta-monooxygenase), OXCT1 - 3-oxoacid coa transferase 1, NR1H3 - …
GO:0007275	multicellular organismal development	0.000377	1.3	11755	715	1853	146	[PKP1 - plakophilin 1 (ectodermal dysplasia/skin fragility syndrome), SEMA6B - sema domain, transmembrane domain (tm), and cytoplasmic domain, (semaphorin) 6b, FOXS1 - forkhead box s1, DCC - deleted in colorectal carcinoma, T - t, brachyury homolog (mouse), OSM - oncostatin m, TRIML1 - tripartite motif family-like 1, HOXD13 - homeobox d13, SEMA4D - sema domain, immunoglobulin domain (ig), transme…
GO:0051336	regulation of hydrolase activity	0.000382	1.35	11755	532	1853	113	[SERPINB1 - serpin peptidase inhibitor, clade b (ovalbumin), member 1, S1PR4 - sphingosine-1-phosphate receptor 4, PRKAR1B - protein kinase, camp-dependent, regulatory, type i, beta, PSMF1 - proteasome (prosome, macropain) inhibitor subunit 1 (pi31), SEMA4D - sema domain, immunoglobulin domain (ig), transmembrane domain (tm) and short cytoplasmic domain, (semaphorin) 4d, RAG1 - recombination acti…
GO:0051239	regulation of multicellular organismal process	0.000457	1.21	11755	1228	1853	235	[ATF5 - activating transcription factor 5, MYL2 - myosin, light chain 2, regulatory, cardiac, slow, TP73 - tumor protein p73, LAMA4 - laminin, alpha 4, ELANE - elastase, neutrophil expressed, MYL5 - myosin, light chain 5, regulatory, PLAT - plasminogen activator, tissue, PLAU - plasminogen activator, urokinase, HOXD13 - homeobox d13, LAMA5 - laminin, alpha 5, KRT36 - keratin 36, BRCA2 - breast ca…
GO:0048520	positive regulation of behavior	0.000477	2.19	11755	55	1853	19	[UTS2R - urotensin 2 receptor, CMKLR1 - chemokine-like receptor 1, CDH13 - cadherin 13, h-cadherin (heart), CX3CL1 - chemokine (c-x3-c motif) ligand 1, CXCL12 - chemokine (c-x-c motif) ligand 12, IL23A - interleukin 23, alpha subunit p19, AZU1 - azurocidin 1, CCL5 - chemokine (c-c motif) ligand 5, STRA6 - stimulated by retinoic acid gene 6 homolog (mouse), NCKAP1L - nck-associated protein 1-like,…
GO:0071731	response to nitric oxide	0.000505	5.29	11755	6	1853	5	[SFTPC - surfactant protein c, SFTPB - surfactant protein b, AQP1 - aquaporin 1 (colton blood group), CDK2 - cyclin-dependent kinase 2, CCR7 - chemokine (c-c motif) receptor 7]
GO:0006805	xenobiotic metabolic process	0.000569	1.84	11755	100	1853	29	[HNF4A - hepatocyte nuclear factor 4, alpha, CYP2B6 - cytochrome p450, family 2, subfamily b, polypeptide 6, CYP2D6 - cytochrome p450, family 2, subfamily d, polypeptide 6, CYP2A6 - cytochrome p450, family 2, subfamily a, polypeptide 6, COMT - catechol-o-methyltransferase, NQO1 - nad(p)h dehydrogenase, quinone 1, CYP4F12 - cytochrome p450, family 4, subfamily f, polypeptide 12, CYP1A2 - cytochrom…
GO:0045981	positive regulation of nucleotide metabolic process	0.00058	2	11755	73	1853	23	[RAMP2 - receptor (g protein-coupled) activity modifying protein 2, MC3R - melanocortin 3 receptor, GALR1 - galanin receptor 1, ADCY4 - adenylate cyclase 4, ADCYAP1 - adenylate cyclase activating polypeptide 1 (pituitary), ADCY7 - adenylate cyclase 7, S1PR4 - sphingosine-1-phosphate receptor 4, HTR4 - 5-hydroxytryptamine (serotonin) receptor 4, ACR - acrosin, CRHR1 - corticotropin releasing hormo…
GO:0006956	complement activation	0.000582	2.72	11755	28	1853	12	[C1QA - complement component 1, q subcomponent, a chain, C1QC - complement component 1, q subcomponent, c chain, CFHR1 - complement factor h-related 1, C1QB - complement component 1, q subcomponent, b chain, C3 - complement component 3, C8G - complement component 8, gamma polypeptide, KRT1 - keratin 1, C4B - complement component 4b (chido blood group), FCN3 - ficolin (collagen/fibrinogen domain c…
GO:0007610	behavior	0.000602	1.47	11755	290	1853	67	[NTSR1 - neurotensin receptor 1 (high affinity), PTGDR - prostaglandin d2 receptor (dp), COMT - catechol-o-methyltransferase, ADRA1B - adrenergic, alpha-1b-, receptor, STRA6 - stimulated by retinoic acid gene 6 homolog (mouse), VDAC1 - voltage-dependent anion channel 1, OSM - oncostatin m, NF1 - neurofibromin 1, ATP1A3 - atpase, na+/k+ transporting, alpha 3 polypeptide, GRIN2D - glutamate recepto…
GO:0006811	ion transport	0.000609	1.3	11755	644	1853	132	[SLC22A18 - solute carrier family 22, member 18, GRIK5 - glutamate receptor, ionotropic, kainate 5, SLC17A4 - solute carrier family 17 (sodium phosphate), member 4, GRIK3 - glutamate receptor, ionotropic, kainate 3, GRIN2D - glutamate receptor, ionotropic, n-methyl d-aspartate 2d, GRIN2C - glutamate receptor, ionotropic, n-methyl d-aspartate 2c, SLCO1C1 - solute carrier organic anion transporter …
GO:0046058	cAMP metabolic process	0.00061	3.02	11755	21	1853	10	[RAMP2 - receptor (g protein-coupled) activity modifying protein 2, GNAS - gnas complex locus, ADORA2A - adenosine a2a receptor, ADCY4 - adenylate cyclase 4, ADCY7 - adenylate cyclase 7, UCN2 - urocortin 2, ADCY1 - adenylate cyclase 1 (brain), PDE4A - phosphodiesterase 4a, camp-specific, ADCY2 - adenylate cyclase 2 (brain), PDE4B - phosphodiesterase 4b, camp-specific]
GO:0071732	cellular response to nitric oxide	0.000616	6.34	11755	4	1853	4	[SFTPC - surfactant protein c, SFTPB - surfactant protein b, AQP1 - aquaporin 1 (colton blood group), CDK2 - cyclin-dependent kinase 2]
GO:0010579	positive regulation of adenylate cyclase activity by G-protein signaling pathway	0.000693	2.38	11755	40	1853	15	[GALR1 - galanin receptor 1, ADCY4 - adenylate cyclase 4, ADCY7 - adenylate cyclase 7, S1PR4 - sphingosine-1-phosphate receptor 4, HTR4 - 5-hydroxytryptamine (serotonin) receptor 4, CRHR1 - corticotropin releasing hormone receptor 1, GLP1R - glucagon-like peptide 1 receptor, GNAS - gnas complex locus, GPR26 - g protein-coupled receptor 26, CALCR - calcitonin receptor, PTH1R - parathyroid hormone …
GO:0010578	regulation of adenylate cyclase activity involved in G-protein signaling pathway	0.000693	2.38	11755	40	1853	15	[GALR1 - galanin receptor 1, ADCY4 - adenylate cyclase 4, ADCY7 - adenylate cyclase 7, S1PR4 - sphingosine-1-phosphate receptor 4, HTR4 - 5-hydroxytryptamine (serotonin) receptor 4, CRHR1 - corticotropin releasing hormone receptor 1, GLP1R - glucagon-like peptide 1 receptor, GNAS - gnas complex locus, GPR26 - g protein-coupled receptor 26, CALCR - calcitonin receptor, PTH1R - parathyroid hormone …
GO:0007189	activation of adenylate cyclase activity by G-protein signaling pathway	0.000693	2.38	11755	40	1853	15	[GALR1 - galanin receptor 1, ADCY4 - adenylate cyclase 4, ADCY7 - adenylate cyclase 7, S1PR4 - sphingosine-1-phosphate receptor 4, HTR4 - 5-hydroxytryptamine (serotonin) receptor 4, CRHR1 - corticotropin releasing hormone receptor 1, GLP1R - glucagon-like peptide 1 receptor, GNAS - gnas complex locus, GPR26 - g protein-coupled receptor 26, CALCR - calcitonin receptor, PTH1R - parathyroid hormone …
GO:0009187	cyclic nucleotide metabolic process	0.000693	2.38	11755	40	1853	15	[RAMP2 - receptor (g protein-coupled) activity modifying protein 2, ADCY4 - adenylate cyclase 4, AQP1 - aquaporin 1 (colton blood group), ADCY7 - adenylate cyclase 7, PDE8B - phosphodiesterase 8b, GNAS - gnas complex locus, GUCY2D - guanylate cyclase 2d, membrane (retina-specific), ADORA2A - adenosine a2a receptor, UCN2 - urocortin 2, ADCY1 - adenylate cyclase 1 (brain), ATP2B2 - atpase, ca++ tra…
GO:0032879	regulation of localization	0.000701	1.24	11755	930	1853	182	[APC - adenomatous polyposis coli, ONECUT2 - one cut homeobox 2, LAMA4 - laminin, alpha 4, PRKAR1B - protein kinase, camp-dependent, regulatory, type i, beta, IL23A - interleukin 23, alpha subunit p19, PKN1 - protein kinase n1, RARRES2 - retinoic acid receptor responder (tazarotene induced) 2, PLAU - plasminogen activator, urokinase, OSM - oncostatin m, LAMA5 - laminin, alpha 5, SEMA4D - sema dom…
GO:0031424	keratinization	0.000753	2.79	11755	25	1853	11	[LCE5A - late cornified envelope 5a, KAZ - kazrin, LCE1B - late cornified envelope 1b, SPRR3 - small proline-rich protein 3, LCE2B - late cornified envelope 2b, LCE2C - late cornified envelope 2c, LCE3A - late cornified envelope 3a, SPRR1B - small proline-rich protein 1b, LOR - loricrin, LCE3C - late cornified envelope 3c, SPRR4 - small proline-rich protein 4]
GO:0051046	regulation of secretion	0.000797	1.43	11755	314	1853	71	[CHRM3 - cholinergic receptor, muscarinic 3, PRKAR1B - protein kinase, camp-dependent, regulatory, type i, beta, OSM - oncostatin m, NF1 - neurofibromin 1, KCNG2 - potassium voltage-gated channel, subfamily g, member 2, KCNB1 - potassium voltage-gated channel, shab-related subfamily, member 1, GNAS - gnas complex locus, OXCT1 - 3-oxoacid coa transferase 1, NR1H3 - nuclear receptor subfamily 1, gr…
GO:0006171	cAMP biosynthetic process	0.000851	3.38	11755	15	1853	8	[RAMP2 - receptor (g protein-coupled) activity modifying protein 2, GNAS - gnas complex locus, ADORA2A - adenosine a2a receptor, ADCY4 - adenylate cyclase 4, ADCY7 - adenylate cyclase 7, UCN2 - urocortin 2, ADCY1 - adenylate cyclase 1 (brain), ADCY2 - adenylate cyclase 2 (brain)]
GO:0017144	drug metabolic process	0.000851	3.38	11755	15	1853	8	[CYP2B6 - cytochrome p450, family 2, subfamily b, polypeptide 6, UGT1A1 - udp glucuronosyltransferase 1 family, polypeptide a1, CYP2D6 - cytochrome p450, family 2, subfamily d, polypeptide 6, CYP2A6 - cytochrome p450, family 2, subfamily a, polypeptide 6, CYP1A2 - cytochrome p450, family 1, subfamily a, polypeptide 2, CAD - carbamoyl-phosphate synthetase 2, aspartate transcarbamylase, and dihydro…
GO:0006833	water transport	0.00091	2.5	11755	33	1853	13	[PRKACG - protein kinase, camp-dependent, catalytic, gamma, ADCY4 - adenylate cyclase 4, AQP1 - aquaporin 1 (colton blood group), AQP4 - aquaporin 4, ADCY7 - adenylate cyclase 7, PRKAR1B - protein kinase, camp-dependent, regulatory, type i, beta, AQP7 - aquaporin 7, GNAS - gnas complex locus, MYLK2 - myosin light chain kinase 2, ADCY1 - adenylate cyclase 1 (brain), MIP - major intrinsic protein o…
