# Supplementary material for: DNA-Methylation Profiling of Fetal Tissues Reveals Marked Epigenetic Differences between Chorionic and Amniotic Samples
Source: PLoS One. 2012 Jun 19;7(6):e39014. doi: 10.1371/journal.pone.0039014 (PMC3378600; doi:10.1371/journal.pone.0039014)
Supplement: Table S3 — Gene ontology terms (GO) significantly enriched in the group of genes differentially methylated between CVS samples without chromosomal imbalances and samples with known trisomy 21 as compared to the entirety of loci present on the array (p<0.001, GOrilla tool: GOprocess). (XLS) [file pone.0039014.s008.xls]

## Sheet: GOPROCESS-T21
GO Term	Description	P-value	Enrichment	N	B	n	b	Genes
GO:0007267	cell-cell signaling	2.78e-09	2.52	11755	579	387	48	[CACNA1G - calcium channel, voltage-dependent, t type, alpha 1g subunit, CHRNA3 - cholinergic receptor, nicotinic, alpha 3, HCN1 - hyperpolarization activated cyclic nucleotide-gated potassium channel 1, KCNF1 - potassium voltage-gated channel, subfamily f, member 1, CHRM1 - cholinergic receptor, muscarinic 1, KCNC4 - potassium voltage-gated channel, shaw-related subfamily, member 4, GABRA2 - gam…
GO:0023052	signaling	4.12e-09	2.49	11755	586	387	48	[CACNA1G - calcium channel, voltage-dependent, t type, alpha 1g subunit, CHRNA3 - cholinergic receptor, nicotinic, alpha 3, HCN1 - hyperpolarization activated cyclic nucleotide-gated potassium channel 1, KCNF1 - potassium voltage-gated channel, subfamily f, member 1, CHRM1 - cholinergic receptor, muscarinic 1, KCNC4 - potassium voltage-gated channel, shaw-related subfamily, member 4, GABRA2 - gam…
GO:0032502	developmental process	1.08e-08	1.53	11755	2828	387	142	[FOXJ1 - forkhead box j1, LAMA2 - laminin, alpha 2, PKP1 - plakophilin 1 (ectodermal dysplasia/skin fragility syndrome), FOXE3 - forkhead box e3, MYH11 - myosin, heavy chain 11, smooth muscle, LAMA3 - laminin, alpha 3, FOXF1 - forkhead box f1, TLX3 - t-cell leukemia homeobox 3, DCC - deleted in colorectal carcinoma, OSM - oncostatin m, FOXF2 - forkhead box f2, T - t, brachyury homolog (mouse), SE…
GO:0048856	anatomical structure development	1.17e-08	1.73	11755	1738	387	99	[FOXJ1 - forkhead box j1, FOXE3 - forkhead box e3, LAMA2 - laminin, alpha 2, LAMA3 - laminin, alpha 3, MYH11 - myosin, heavy chain 11, smooth muscle, FOXF1 - forkhead box f1, TLX3 - t-cell leukemia homeobox 3, T - t, brachyury homolog (mouse), FOXF2 - forkhead box f2, OSM - oncostatin m, SEMA4D - sema domain, immunoglobulin domain (ig), transmembrane domain (tm) and short cytoplasmic domain, (sem…
GO:0042755	eating behavior	2.25e-08	11.89	11755	23	387	9	[TACR1 - tachykinin receptor 1, CCK - cholecystokinin, CPT1A - carnitine palmitoyltransferase 1a (liver), TH - tyrosine hydroxylase, PYY - peptide yy, NPY5R - neuropeptide y receptor y5, UCHL1 - ubiquitin carboxyl-terminal esterase l1 (ubiquitin thiolesterase), TCF15 - transcription factor 15 (basic helix-loop-helix), PRLH - prolactin releasing hormone]
GO:0048513	organ development	2.45e-08	2.21	11755	741	387	54	[FOXJ1 - forkhead box j1, CHRNA3 - cholinergic receptor, nicotinic, alpha 3, LAMA2 - laminin, alpha 2, FOXE3 - forkhead box e3, LBX1 - ladybird homeobox 1, MSX1 - msh homeobox 1, ATOH1 - atonal homolog 1 (drosophila), FOXF1 - forkhead box f1, FOXF2 - forkhead box f2, T - t, brachyury homolog (mouse), HOXD11 - homeobox d11, FOXL1 - forkhead box l1, FRZB - frizzled-related protein, IHH - indian hed…
GO:0006812	cation transport	9.91e-08	2.55	11755	452	387	38	[SLC22A18 - solute carrier family 22, member 18, CACNA1G - calcium channel, voltage-dependent, t type, alpha 1g subunit, CHRNA3 - cholinergic receptor, nicotinic, alpha 3, SLC30A2 - solute carrier family 30 (zinc transporter), member 2, SLC12A2 - solute carrier family 12 (sodium/potassium/chloride transporters), member 2, TRPC4 - transient receptor potential cation channel, subfamily c, member 4,…
GO:0007268	synaptic transmission	1.04e-07	2.78	11755	361	387	33	[CACNA1G - calcium channel, voltage-dependent, t type, alpha 1g subunit, CHRNA3 - cholinergic receptor, nicotinic, alpha 3, HCN1 - hyperpolarization activated cyclic nucleotide-gated potassium channel 1, KCNF1 - potassium voltage-gated channel, subfamily f, member 1, CHRM1 - cholinergic receptor, muscarinic 1, KCNC4 - potassium voltage-gated channel, shaw-related subfamily, member 4, GABRA2 - gam…
GO:0007154	cell communication	1.49e-07	2.13	11755	740	387	52	[CHRNA3 - cholinergic receptor, nicotinic, alpha 3, HCN1 - hyperpolarization activated cyclic nucleotide-gated potassium channel 1, KCNF1 - potassium voltage-gated channel, subfamily f, member 1, CHRM1 - cholinergic receptor, muscarinic 1, KCNC4 - potassium voltage-gated channel, shaw-related subfamily, member 4, KCND3 - potassium voltage-gated channel, shal-related subfamily, member 3, HOXD11 - …
GO:0006811	ion transport	2.1e-07	2.22	11755	644	387	47	[CACNA1G - calcium channel, voltage-dependent, t type, alpha 1g subunit, SLC22A18 - solute carrier family 22, member 18, CHRNA3 - cholinergic receptor, nicotinic, alpha 3, NALCN - sodium leak channel, non-selective, CACNA1H - calcium channel, voltage-dependent, t type, alpha 1h subunit, SLC30A2 - solute carrier family 30 (zinc transporter), member 2, SLC12A2 - solute carrier family 12 (sodium/pot…
GO:0051239	regulation of multicellular organismal process	3.24e-07	1.81	11755	1228	387	73	[FOXJ1 - forkhead box j1, TACR1 - tachykinin receptor 1, CHRNA3 - cholinergic receptor, nicotinic, alpha 3, LAMA2 - laminin, alpha 2, PTGER3 - prostaglandin e receptor 3 (subtype ep3), LBX1 - ladybird homeobox 1, LAMA3 - laminin, alpha 3, MSX1 - msh homeobox 1, ATOH1 - atonal homolog 1 (drosophila), TLX3 - t-cell leukemia homeobox 3, DCC - deleted in colorectal carcinoma, GNAO1 - guanine nucleoti…
GO:0007631	feeding behavior	3.78e-07	6.18	11755	59	387	12	[TACR1 - tachykinin receptor 1, PRLHR - prolactin releasing hormone receptor, CCK - cholecystokinin, CPT1A - carnitine palmitoyltransferase 1a (liver), TH - tyrosine hydroxylase, DRD2 - dopamine receptor d2, PYY - peptide yy, CNTFR - ciliary neurotrophic factor receptor, NPY5R - neuropeptide y receptor y5, TCF15 - transcription factor 15 (basic helix-loop-helix), UCHL1 - ubiquitin carboxyl-termin…
GO:0048731	system development	4.16e-07	2.21	11755	618	387	45	[CHRNA3 - cholinergic receptor, nicotinic, alpha 3, FOXE3 - forkhead box e3, LBX1 - ladybird homeobox 1, SH3GL2 - sh3-domain grb2-like 2, FOXF1 - forkhead box f1, ATOH1 - atonal homolog 1 (drosophila), CHRM1 - cholinergic receptor, muscarinic 1, TLL1 - tolloid-like 1, IGF2 - insulin-like growth factor 2 (somatomedin a), TLX3 - t-cell leukemia homeobox 3, ZBTB16 - zinc finger and btb domain contai…
GO:0009653	anatomical structure morphogenesis	6.03e-07	1.96	11755	883	387	57	[FOXJ1 - forkhead box j1, FOXE3 - forkhead box e3, LBX1 - ladybird homeobox 1, MSX1 - msh homeobox 1, ATOH1 - atonal homolog 1 (drosophila), FOXF1 - forkhead box f1, DCC - deleted in colorectal carcinoma, FOXF2 - forkhead box f2, T - t, brachyury homolog (mouse), SEMA4D - sema domain, immunoglobulin domain (ig), transmembrane domain (tm) and short cytoplasmic domain, (semaphorin) 4d, FOXL1 - fork…
GO:0007389	pattern specification process	1.1e-06	2.83	11755	290	387	27	[FOXJ1 - forkhead box j1, FOXE3 - forkhead box e3, FOXN4 - forkhead box n4, MSX1 - msh homeobox 1, FOXF1 - forkhead box f1, ZBTB16 - zinc finger and btb domain containing 16, FOXF2 - forkhead box f2, T - t, brachyury homolog (mouse), WT1 - wilms tumor 1, TCF15 - transcription factor 15 (basic helix-loop-helix), HOXD11 - homeobox d11, FOXL1 - forkhead box l1, IHH - indian hedgehog, PCDH8 - protoca…
GO:0048598	embryonic morphogenesis	1.43e-06	2.93	11755	259	387	25	[FOXE3 - forkhead box e3, MSX1 - msh homeobox 1, CREBBP - creb binding protein, FOXF1 - forkhead box f1, ATOH1 - atonal homolog 1 (drosophila), ZBTB16 - zinc finger and btb domain containing 16, T - t, brachyury homolog (mouse), HOXD11 - homeobox d11, FRZB - frizzled-related protein, IHH - indian hedgehog, GNAS - gnas complex locus, PCDH8 - protocadherin 8, GATA4 - gata binding protein 4, FZD2 - …
GO:0045595	regulation of cell differentiation	1.5e-06	2.05	11755	711	387	48	[FOXJ1 - forkhead box j1, CHRNA3 - cholinergic receptor, nicotinic, alpha 3, LBX1 - ladybird homeobox 1, DLK2 - delta-like 2 homolog (drosophila), MSX1 - msh homeobox 1, CREBBP - creb binding protein, FOXF1 - forkhead box f1, ATOH1 - atonal homolog 1 (drosophila), TLX3 - t-cell leukemia homeobox 3, ZBTB16 - zinc finger and btb domain containing 16, DCC - deleted in colorectal carcinoma, SEMA4D - …
GO:0007275	multicellular organismal development	1.75e-06	2.04	11755	715	387	48	[FOXE3 - forkhead box e3, PKP1 - plakophilin 1 (ectodermal dysplasia/skin fragility syndrome), LBX1 - ladybird homeobox 1, MSX1 - msh homeobox 1, EPHA7 - eph receptor a7, PRRX1 - paired related homeobox 1, ATOH1 - atonal homolog 1 (drosophila), TLL1 - tolloid-like 1, IGF2 - insulin-like growth factor 2 (somatomedin a), TLX3 - t-cell leukemia homeobox 3, DCC - deleted in colorectal carcinoma, T - …
GO:0007186	G-protein coupled receptor signaling pathway	1.8e-06	2.45	11755	409	387	33	[PTGER2 - prostaglandin e receptor 2 (subtype ep2), 53kda, TACR1 - tachykinin receptor 1, PTGER3 - prostaglandin e receptor 3 (subtype ep3), PRLHR - prolactin releasing hormone receptor, CXCL12 - chemokine (c-x-c motif) ligand 12, CHRM1 - cholinergic receptor, muscarinic 1, LGR5 - leucine-rich repeat-containing g protein-coupled receptor 5, CALY - calcyon neuron-specific vesicular protein, GNAO1 …
GO:0050793	regulation of developmental process	2.38e-06	1.84	11755	990	387	60	[FOXJ1 - forkhead box j1, CHRNA3 - cholinergic receptor, nicotinic, alpha 3, LAMA2 - laminin, alpha 2, LBX1 - ladybird homeobox 1, LAMA3 - laminin, alpha 3, MSX1 - msh homeobox 1, FOXF1 - forkhead box f1, ATOH1 - atonal homolog 1 (drosophila), TLX3 - t-cell leukemia homeobox 3, DCC - deleted in colorectal carcinoma, BNIP3 - bcl2/adenovirus e1b 19kda interacting protein 3, SEMA4D - sema domain, im…
GO:0032501	multicellular organismal process	2.48e-06	1.52	11755	2145	387	107	[SLC22A18 - solute carrier family 22, member 18, FOXJ1 - forkhead box j1, PKP1 - plakophilin 1 (ectodermal dysplasia/skin fragility syndrome), FOXE3 - forkhead box e3, TACR1 - tachykinin receptor 1, MYH11 - myosin, heavy chain 11, smooth muscle, FOXF1 - forkhead box f1, TLX3 - t-cell leukemia homeobox 3, DCC - deleted in colorectal carcinoma, OSM - oncostatin m, T - t, brachyury homolog (mouse), …
GO:0051093	negative regulation of developmental process	2.65e-06	2.54	11755	359	387	30	[FOXJ1 - forkhead box j1, USP2 - ubiquitin specific peptidase 2, LBX1 - ladybird homeobox 1, MSX1 - msh homeobox 1, CREBBP - creb binding protein, TLX3 - t-cell leukemia homeobox 3, DCC - deleted in colorectal carcinoma, ZBTB16 - zinc finger and btb domain containing 16, WT1 - wilms tumor 1, BNIP3 - bcl2/adenovirus e1b 19kda interacting protein 3, SEMA4D - sema domain, immunoglobulin domain (ig),…
GO:0055085	transmembrane transport	3.27e-06	2.14	11755	582	387	41	[CACNA1G - calcium channel, voltage-dependent, t type, alpha 1g subunit, SLC22A18 - solute carrier family 22, member 18, CHRNA3 - cholinergic receptor, nicotinic, alpha 3, NALCN - sodium leak channel, non-selective, CACNA1H - calcium channel, voltage-dependent, t type, alpha 1h subunit, SLC30A2 - solute carrier family 30 (zinc transporter), member 2, SLC12A2 - solute carrier family 12 (sodium/pot…
GO:0030001	metal ion transport	3.7e-06	2.45	11755	384	387	31	[CACNA1G - calcium channel, voltage-dependent, t type, alpha 1g subunit, SLC30A2 - solute carrier family 30 (zinc transporter), member 2, SLC12A2 - solute carrier family 12 (sodium/potassium/chloride transporters), member 2, HCN1 - hyperpolarization activated cyclic nucleotide-gated potassium channel 1, RAMP1 - receptor (g protein-coupled) activity modifying protein 1, TRPC4 - transient receptor …
GO:0045944	positive regulation of transcription from RNA polymerase II promoter	4e-06	2.26	11755	484	387	36	[FOXJ1 - forkhead box j1, FOXE3 - forkhead box e3, MSX1 - msh homeobox 1, CREBBP - creb binding protein, RBM14 - rna binding motif protein 14, ATOH1 - atonal homolog 1 (drosophila), PLAGL1 - pleiomorphic adenoma gene-like 1, FOXF1 - forkhead box f1, OSM - oncostatin m, T - t, brachyury homolog (mouse), FOXF2 - forkhead box f2, WT1 - wilms tumor 1, OTX2 - orthodenticle homeobox 2, IHH - indian hed…
GO:0045165	cell fate commitment	4.29e-06	4.59	11755	86	387	13	[FOXN4 - forkhead box n4, SFRP1 - secreted frizzled-related protein 1, WT1 - wilms tumor 1, IHH - indian hedgehog, SOX8 - sry (sex determining region y)-box 8, SOX12 - sry (sex determining region y)-box 12, BCL2 - b-cell cll/lymphoma 2, FGF10 - fibroblast growth factor 10, GSX1 - gs homeobox 1, GATA4 - gata binding protein 4, NKX2-2 - nk2 homeobox 2, NKX2-5 - nk2 transcription factor related, loc…
GO:0044057	regulation of system process	8.45e-06	2.54	11755	323	387	27	[CACNA1G - calcium channel, voltage-dependent, t type, alpha 1g subunit, TACR1 - tachykinin receptor 1, FOXN4 - forkhead box n4, LAMA2 - laminin, alpha 2, CHRNA3 - cholinergic receptor, nicotinic, alpha 3, CACNA1H - calcium channel, voltage-dependent, t type, alpha 1h subunit, TLX3 - t-cell leukemia homeobox 3, KCNC4 - potassium voltage-gated channel, shaw-related subfamily, member 4, GNAO1 - gua…
GO:0048869	cellular developmental process	9.66e-06	1.64	11755	1370	387	74	[FOXJ1 - forkhead box j1, FOXE3 - forkhead box e3, MYH11 - myosin, heavy chain 11, smooth muscle, LBX1 - ladybird homeobox 1, NFATC4 - nuclear factor of activated t-cells, cytoplasmic, calcineurin-dependent 4, MSX1 - msh homeobox 1, HCN1 - hyperpolarization activated cyclic nucleotide-gated potassium channel 1, FOXF1 - forkhead box f1, ATOH1 - atonal homolog 1 (drosophila), TLX3 - t-cell leukemia…
GO:0007610	behavior	1.08e-05	2.62	11755	290	387	25	[TACR1 - tachykinin receptor 1, CHRNA3 - cholinergic receptor, nicotinic, alpha 3, PRLHR - prolactin releasing hormone receptor, OSM - oncostatin m, GNAO1 - guanine nucleotide binding protein (g protein), alpha activating activity polypeptide o, TCF15 - transcription factor 15 (basic helix-loop-helix), GNAS - gnas complex locus, PTGS2 - prostaglandin-endoperoxide synthase 2 (prostaglandin g/h syn…
GO:0051094	positive regulation of developmental process	1.16e-05	2.18	11755	487	387	35	[USP2 - ubiquitin specific peptidase 2, ATOH1 - atonal homolog 1 (drosophila), ZBTB16 - zinc finger and btb domain containing 16, WT1 - wilms tumor 1, BNIP3 - bcl2/adenovirus e1b 19kda interacting protein 3, SEMA4D - sema domain, immunoglobulin domain (ig), transmembrane domain (tm) and short cytoplasmic domain, (semaphorin) 4d, OTX2 - orthodenticle homeobox 2, HOXD11 - homeobox d11, IHH - indian…
GO:0007423	sensory organ development	1.24e-05	4.5	11755	81	387	12	[PAX8 - paired box 8, FOXE3 - forkhead box e3, BCL2 - b-cell cll/lymphoma 2, FGF10 - fibroblast growth factor 10, GSC - goosecoid homeobox, PITX2 - paired-like homeodomain 2, COL2A1 - collagen, type ii, alpha 1, WT1 - wilms tumor 1, SMOC1 - sparc related modular calcium binding 1, TCF15 - transcription factor 15 (basic helix-loop-helix), FOXL1 - forkhead box l1, IHH - indian hedgehog]
GO:2000026	regulation of multicellular organismal development	1.46e-05	1.89	11755	773	387	48	[FOXJ1 - forkhead box j1, USP2 - ubiquitin specific peptidase 2, LAMA2 - laminin, alpha 2, CHRNA3 - cholinergic receptor, nicotinic, alpha 3, LAMA3 - laminin, alpha 3, LBX1 - ladybird homeobox 1, MSX1 - msh homeobox 1, ATOH1 - atonal homolog 1 (drosophila), TLX3 - t-cell leukemia homeobox 3, DCC - deleted in colorectal carcinoma, ZBTB16 - zinc finger and btb domain containing 16, WT1 - wilms tumo…
GO:0048518	positive regulation of biological process	2.69e-05	1.42	11755	2446	387	114	[FOXJ1 - forkhead box j1, FOXE3 - forkhead box e3, TACR1 - tachykinin receptor 1, LAMA2 - laminin, alpha 2, PLAGL1 - pleiomorphic adenoma gene-like 1, FOXF1 - forkhead box f1, DCC - deleted in colorectal carcinoma, OSM - oncostatin m, T - t, brachyury homolog (mouse), FOXF2 - forkhead box f2, SEMA4D - sema domain, immunoglobulin domain (ig), transmembrane domain (tm) and short cytoplasmic domain,…
GO:0048522	positive regulation of cellular process	3.33e-05	1.43	11755	2244	387	106	[FOXJ1 - forkhead box j1, FOXE3 - forkhead box e3, TACR1 - tachykinin receptor 1, LAMA2 - laminin, alpha 2, PLAGL1 - pleiomorphic adenoma gene-like 1, FOXF1 - forkhead box f1, DCC - deleted in colorectal carcinoma, OSM - oncostatin m, FOXF2 - forkhead box f2, T - t, brachyury homolog (mouse), SEMA4D - sema domain, immunoglobulin domain (ig), transmembrane domain (tm) and short cytoplasmic domain,…
GO:0048266	behavioral response to pain	3.74e-05	17.36	11755	7	387	4	[TACR1 - tachykinin receptor 1, P2RX3 - purinergic receptor p2x, ligand-gated ion channel, 3, OSM - oncostatin m, TSPO - translocator protein (18kda)]
GO:0006813	potassium ion transport	4.04e-05	3.35	11755	136	387	15	[SLC12A2 - solute carrier family 12 (sodium/potassium/chloride transporters), member 2, HCN1 - hyperpolarization activated cyclic nucleotide-gated potassium channel 1, KCNF1 - potassium voltage-gated channel, subfamily f, member 1, KCNS2 - potassium voltage-gated channel, delayed-rectifier, subfamily s, member 2, KCNS1 - potassium voltage-gated channel, delayed-rectifier, subfamily s, member 1, K…
GO:0051960	regulation of nervous system development	4.36e-05	2.41	11755	315	387	25	[CHRNA3 - cholinergic receptor, nicotinic, alpha 3, LBX1 - ladybird homeobox 1, ATOH1 - atonal homolog 1 (drosophila), DCC - deleted in colorectal carcinoma, TLX3 - t-cell leukemia homeobox 3, SEMA4D - sema domain, immunoglobulin domain (ig), transmembrane domain (tm) and short cytoplasmic domain, (semaphorin) 4d, CCND2 - cyclin d2, SOX8 - sry (sex determining region y)-box 8, FZD2 - frizzled hom…
GO:0009888	tissue development	5.96e-05	2.2	11755	401	387	29	[FOXN4 - forkhead box n4, LAMA3 - laminin, alpha 3, MSX1 - msh homeobox 1, FOXF1 - forkhead box f1, ZBTB16 - zinc finger and btb domain containing 16, OTOP1 - otopetrin 1, FOXF2 - forkhead box f2, T - t, brachyury homolog (mouse), WT1 - wilms tumor 1, TCF15 - transcription factor 15 (basic helix-loop-helix), MSC - musculin, STX2 - syntaxin 2, HOXD11 - homeobox d11, FOXL1 - forkhead box l1, FRZB -…
GO:0031328	positive regulation of cellular biosynthetic process	6.26e-05	1.72	11755	935	387	53	[FOXJ1 - forkhead box j1, FOXE3 - forkhead box e3, MSX1 - msh homeobox 1, ATOH1 - atonal homolog 1 (drosophila), PLAGL1 - pleiomorphic adenoma gene-like 1, FOXF1 - forkhead box f1, OSM - oncostatin m, T - t, brachyury homolog (mouse), FOXF2 - forkhead box f2, OTX2 - orthodenticle homeobox 2, IHH - indian hedgehog, SOX8 - sry (sex determining region y)-box 8, GNAS - gnas complex locus, PIAS1 - pro…
GO:0006357	regulation of transcription from RNA polymerase II promoter	6.75e-05	1.76	11755	844	387	49	[FOXJ1 - forkhead box j1, FOXE3 - forkhead box e3, LBX1 - ladybird homeobox 1, MSX1 - msh homeobox 1, PLAGL1 - pleiomorphic adenoma gene-like 1, ATOH1 - atonal homolog 1 (drosophila), FOXF1 - forkhead box f1, OSM - oncostatin m, T - t, brachyury homolog (mouse), FOXF2 - forkhead box f2, SEMA4D - sema domain, immunoglobulin domain (ig), transmembrane domain (tm) and short cytoplasmic domain, (sema…
GO:0010557	positive regulation of macromolecule biosynthetic process	7.2e-05	1.77	11755	823	387	48	[FOXJ1 - forkhead box j1, FOXE3 - forkhead box e3, MSX1 - msh homeobox 1, SPN - sialophorin, CREBBP - creb binding protein, RBM14 - rna binding motif protein 14, RAMP1 - receptor (g protein-coupled) activity modifying protein 1, FOXF1 - forkhead box f1, ATOH1 - atonal homolog 1 (drosophila), PLAGL1 - pleiomorphic adenoma gene-like 1, IGF2 - insulin-like growth factor 2 (somatomedin a), ZBTB16 - z…
GO:0045596	negative regulation of cell differentiation	8.01e-05	2.43	11755	288	387	23	[FOXJ1 - forkhead box j1, LBX1 - ladybird homeobox 1, SFRP1 - secreted frizzled-related protein 1, MSX1 - msh homeobox 1, RUNX1 - runt-related transcription factor 1, GDF11 - growth differentiation factor 11, CREBBP - creb binding protein, ZBTB16 - zinc finger and btb domain containing 16, TLX3 - t-cell leukemia homeobox 3, DCC - deleted in colorectal carcinoma, TSPO - translocator protein (18kda…
GO:0048562	embryonic organ morphogenesis	8.2e-05	4.03	11755	83	387	11	[GNAS - gnas complex locus, FOXE3 - forkhead box e3, ALX4 - alx homeobox 4, FGF10 - fibroblast growth factor 10, GSC - goosecoid homeobox, GATA4 - gata binding protein 4, TH - tyrosine hydroxylase, FOXF1 - forkhead box f1, SOX11 - sry (sex determining region y)-box 11, COL2A1 - collagen, type ii, alpha 1, IHH - indian hedgehog]
GO:0009891	positive regulation of biosynthetic process	8.98e-05	1.7	11755	948	387	53	[FOXJ1 - forkhead box j1, FOXE3 - forkhead box e3, MSX1 - msh homeobox 1, ATOH1 - atonal homolog 1 (drosophila), PLAGL1 - pleiomorphic adenoma gene-like 1, FOXF1 - forkhead box f1, OSM - oncostatin m, T - t, brachyury homolog (mouse), FOXF2 - forkhead box f2, OTX2 - orthodenticle homeobox 2, IHH - indian hedgehog, SOX8 - sry (sex determining region y)-box 8, GNAS - gnas complex locus, PIAS1 - pro…
GO:0009887	organ morphogenesis	0.000102	2.29	11755	332	387	25	[FOXE3 - forkhead box e3, MSX1 - msh homeobox 1, FOXF1 - forkhead box f1, T - t, brachyury homolog (mouse), STX2 - syntaxin 2, TCF15 - transcription factor 15 (basic helix-loop-helix), FOXL1 - forkhead box l1, IHH - indian hedgehog, LHX9 - lim homeobox 9, SOX8 - sry (sex determining region y)-box 8, GNAS - gnas complex locus, GATA4 - gata binding protein 4, PITX2 - paired-like homeodomain 2, NKX2…
GO:0008016	regulation of heart contraction	0.000102	4.28	11755	71	387	10	[HCN4 - hyperpolarization activated cyclic nucleotide-gated potassium channel 4, CACNA1G - calcium channel, voltage-dependent, t type, alpha 1g subunit, FOXN4 - forkhead box n4, DES - desmin, CACNA1H - calcium channel, voltage-dependent, t type, alpha 1h subunit, DRD2 - dopamine receptor d2, TH - tyrosine hydroxylase, GNAO1 - guanine nucleotide binding protein (g protein), alpha activating activi…
GO:0045893	positive regulation of transcription, DNA-dependent	0.000104	1.81	11755	720	387	43	[FOXJ1 - forkhead box j1, FOXE3 - forkhead box e3, MSX1 - msh homeobox 1, CREBBP - creb binding protein, RBM14 - rna binding motif protein 14, FOXF1 - forkhead box f1, PLAGL1 - pleiomorphic adenoma gene-like 1, ATOH1 - atonal homolog 1 (drosophila), ZBTB16 - zinc finger and btb domain containing 16, FOXF2 - forkhead box f2, T - t, brachyury homolog (mouse), OSM - oncostatin m, WT1 - wilms tumor 1…
GO:0003002	regionalization	0.000106	2.84	11755	182	387	17	[PAX8 - paired box 8, FOXJ1 - forkhead box j1, ALX4 - alx homeobox 4, MSX1 - msh homeobox 1, GDF11 - growth differentiation factor 11, FOXF1 - forkhead box f1, ZBTB16 - zinc finger and btb domain containing 16, T - t, brachyury homolog (mouse), WT1 - wilms tumor 1, TCF15 - transcription factor 15 (basic helix-loop-helix), HOXD11 - homeobox d11, PCDH8 - protocadherin 8, GATA4 - gata binding protei…
GO:0015672	monovalent inorganic cation transport	0.000106	2.5	11755	255	387	21	[SLC32A1 - solute carrier family 32 (gaba vesicular transporter), member 1, SLC5A1 - solute carrier family 5 (sodium/glucose cotransporter), member 1, SLC12A2 - solute carrier family 12 (sodium/potassium/chloride transporters), member 2, HCN1 - hyperpolarization activated cyclic nucleotide-gated potassium channel 1, KCNF1 - potassium voltage-gated channel, subfamily f, member 1, KCNS2 - potassium…
GO:0048557	embryonic digestive tract morphogenesis	0.000122	9.49	11755	16	387	5	[FGF10 - fibroblast growth factor 10, GATA4 - gata binding protein 4, FOXF1 - forkhead box f1, SOX11 - sry (sex determining region y)-box 11, IHH - indian hedgehog]
GO:0051173	positive regulation of nitrogen compound metabolic process	0.00014	1.7	11755	893	387	50	[FOXJ1 - forkhead box j1, FOXE3 - forkhead box e3, MSX1 - msh homeobox 1, ATOH1 - atonal homolog 1 (drosophila), PLAGL1 - pleiomorphic adenoma gene-like 1, FOXF1 - forkhead box f1, OSM - oncostatin m, FOXF2 - forkhead box f2, T - t, brachyury homolog (mouse), OTX2 - orthodenticle homeobox 2, IHH - indian hedgehog, SOX8 - sry (sex determining region y)-box 8, GNAS - gnas complex locus, PIAS1 - pro…
GO:0045935	positive regulation of nucleobase-containing compound metabolic process	0.000163	1.7	11755	875	387	49	[FOXJ1 - forkhead box j1, FOXE3 - forkhead box e3, MSX1 - msh homeobox 1, ATOH1 - atonal homolog 1 (drosophila), PLAGL1 - pleiomorphic adenoma gene-like 1, FOXF1 - forkhead box f1, OSM - oncostatin m, FOXF2 - forkhead box f2, T - t, brachyury homolog (mouse), OTX2 - orthodenticle homeobox 2, IHH - indian hedgehog, SOX8 - sry (sex determining region y)-box 8, GNAS - gnas complex locus, PIAS1 - pro…
GO:0071805	potassium ion transmembrane transport	0.000207	5.6	11755	38	387	7	[KCNN2 - potassium intermediate/small conductance calcium-activated channel, subfamily n, member 2, HCN1 - hyperpolarization activated cyclic nucleotide-gated potassium channel 1, KCNF1 - potassium voltage-gated channel, subfamily f, member 1, KCNK9 - potassium channel, subfamily k, member 9, KCNQ3 - potassium voltage-gated channel, kqt-like subfamily, member 3, KCNC4 - potassium voltage-gated ch…
GO:0071804	cellular potassium ion transport	0.000207	5.6	11755	38	387	7	[KCNN2 - potassium intermediate/small conductance calcium-activated channel, subfamily n, member 2, HCN1 - hyperpolarization activated cyclic nucleotide-gated potassium channel 1, KCNF1 - potassium voltage-gated channel, subfamily f, member 1, KCNK9 - potassium channel, subfamily k, member 9, KCNQ3 - potassium voltage-gated channel, kqt-like subfamily, member 3, KCNC4 - potassium voltage-gated ch…
GO:0045597	positive regulation of cell differentiation	0.000208	2.15	11755	368	387	26	[ATOH1 - atonal homolog 1 (drosophila), ZBTB16 - zinc finger and btb domain containing 16, SEMA4D - sema domain, immunoglobulin domain (ig), transmembrane domain (tm) and short cytoplasmic domain, (semaphorin) 4d, HOXD11 - homeobox d11, FRZB - frizzled-related protein, IHH - indian hedgehog, SOX8 - sry (sex determining region y)-box 8, GNAS - gnas complex locus, PTGS2 - prostaglandin-endoperoxide…
GO:0001763	morphogenesis of a branching structure	0.000237	3.16	11755	125	387	13	[PAX8 - paired box 8, SFRP1 - secreted frizzled-related protein 1, SLC12A2 - solute carrier family 12 (sodium/potassium/chloride transporters), member 2, EPHA7 - eph receptor a7, FOXF1 - forkhead box f1, WT1 - wilms tumor 1, HOXD11 - homeobox d11, IHH - indian hedgehog, SOX8 - sry (sex determining region y)-box 8, BCL2 - b-cell cll/lymphoma 2, FGF10 - fibroblast growth factor 10, DRD2 - dopamine …
GO:0051926	negative regulation of calcium ion transport	0.000299	7.99	11755	19	387	5	[BCL2 - b-cell cll/lymphoma 2, PTGS2 - prostaglandin-endoperoxide synthase 2 (prostaglandin g/h synthase and cyclooxygenase), DRD2 - dopamine receptor d2, NCS1 - neuronal calcium sensor 1, GNAO1 - guanine nucleotide binding protein (g protein), alpha activating activity polypeptide o]
GO:0014012	peripheral nervous system axon regeneration	0.000337	18.22	11755	5	387	3	[APOE - apolipoprotein e, CHST3 - carbohydrate (chondroitin 6) sulfotransferase 3, TSPO - translocator protein (18kda)]
GO:0060022	hard palate development	0.000337	18.22	11755	5	387	3	[FOXE3 - forkhead box e3, FZD2 - frizzled homolog 2 (drosophila), SOX11 - sry (sex determining region y)-box 11]
GO:0033555	multicellular organismal response to stress	0.000339	5.19	11755	41	387	7	[TACR1 - tachykinin receptor 1, BCL2 - b-cell cll/lymphoma 2, CCK - cholecystokinin, P2RX3 - purinergic receptor p2x, ligand-gated ion channel, 3, OSM - oncostatin m, TSPO - translocator protein (18kda), SLC6A2 - solute carrier family 6 (neurotransmitter transporter, noradrenalin), member 2]
GO:0008589	regulation of smoothened signaling pathway	0.000372	6.07	11755	30	387	6	[SFRP1 - secreted frizzled-related protein 1, FGF10 - fibroblast growth factor 10, CREBBP - creb binding protein, ZIC1 - zic family member 1 (odd-paired homolog, drosophila), OTX2 - orthodenticle homeobox 2, IHH - indian hedgehog]
GO:0060284	regulation of cell development	0.000372	2.1	11755	361	387	25	[CHRNA3 - cholinergic receptor, nicotinic, alpha 3, LBX1 - ladybird homeobox 1, ATOH1 - atonal homolog 1 (drosophila), DCC - deleted in colorectal carcinoma, TLX3 - t-cell leukemia homeobox 3, SEMA4D - sema domain, immunoglobulin domain (ig), transmembrane domain (tm) and short cytoplasmic domain, (semaphorin) 4d, CCND2 - cyclin d2, HOXD11 - homeobox d11, FRZB - frizzled-related protein, SOX8 - s…
GO:0009605	response to external stimulus	0.000382	1.7	11755	788	387	44	[CACNA1G - calcium channel, voltage-dependent, t type, alpha 1g subunit, TACR1 - tachykinin receptor 1, MYH11 - myosin, heavy chain 11, smooth muscle, SH3GL2 - sh3-domain grb2-like 2, CACNA1H - calcium channel, voltage-dependent, t type, alpha 1h subunit, SPN - sialophorin, CXCL12 - chemokine (c-x-c motif) ligand 12, EPHA7 - eph receptor a7, SLC12A2 - solute carrier family 12 (sodium/potassium/ch…
GO:0048265	response to pain	0.000388	7.59	11755	20	387	5	[TACR1 - tachykinin receptor 1, P2RX3 - purinergic receptor p2x, ligand-gated ion channel, 3, OSM - oncostatin m, SLC6A2 - solute carrier family 6 (neurotransmitter transporter, noradrenalin), member 2, TSPO - translocator protein (18kda)]
GO:0051254	positive regulation of RNA metabolic process	0.000389	1.71	11755	765	387	43	[FOXJ1 - forkhead box j1, FOXE3 - forkhead box e3, MSX1 - msh homeobox 1, CREBBP - creb binding protein, RBM14 - rna binding motif protein 14, FOXF1 - forkhead box f1, PLAGL1 - pleiomorphic adenoma gene-like 1, ATOH1 - atonal homolog 1 (drosophila), ZBTB16 - zinc finger and btb domain containing 16, T - t, brachyury homolog (mouse), FOXF2 - forkhead box f2, OSM - oncostatin m, WT1 - wilms tumor 1…
GO:0060429	epithelium development	0.000396	5.06	11755	42	387	7	[PAX8 - paired box 8, MSX1 - msh homeobox 1, FGF10 - fibroblast growth factor 10, POU3F3 - pou class 3 homeobox 3, WT1 - wilms tumor 1, IHH - indian hedgehog, FRZB - frizzled-related protein]
GO:0008406	gonad development	0.000419	3.62	11755	84	387	10	[LHX9 - lim homeobox 9, SOX8 - sry (sex determining region y)-box 8, BCL2 - b-cell cll/lymphoma 2, SFRP1 - secreted frizzled-related protein 1, UTF1 - undifferentiated embryonic cell transcription factor 1, GATA4 - gata binding protein 4, FANCA - fanconi anemia, complementation group a, FZD2 - frizzled homolog 2 (drosophila), WT1 - wilms tumor 1, FRZB - frizzled-related protein]
GO:0001656	metanephros development	0.000448	5.88	11755	31	387	6	[BCL2 - b-cell cll/lymphoma 2, SLC5A1 - solute carrier family 5 (sodium/glucose cotransporter), member 1, FGF10 - fibroblast growth factor 10, GDF11 - growth differentiation factor 11, WT1 - wilms tumor 1, HOXD11 - homeobox d11]
GO:0042127	regulation of cell proliferation	0.000453	1.64	11755	890	387	48	[FOXJ1 - forkhead box j1, FOXE3 - forkhead box e3, TACR1 - tachykinin receptor 1, PTGER2 - prostaglandin e receptor 2 (subtype ep2), 53kda, LBX1 - ladybird homeobox 1, MSX1 - msh homeobox 1, SPN - sialophorin, FOXF1 - forkhead box f1, CHRM1 - cholinergic receptor, muscarinic 1, ZBTB16 - zinc finger and btb domain containing 16, IGF2 - insulin-like growth factor 2 (somatomedin a), T - t, brachyury…
GO:0048468	cell development	0.000462	2.3	11755	264	387	20	[FOXE3 - forkhead box e3, MYH11 - myosin, heavy chain 11, smooth muscle, RUNX1 - runt-related transcription factor 1, HCN1 - hyperpolarization activated cyclic nucleotide-gated potassium channel 1, WT1 - wilms tumor 1, SOX11 - sry (sex determining region y)-box 11, EN2 - engrailed homeobox 2, IHH - indian hedgehog, SOX8 - sry (sex determining region y)-box 8, DHH - desert hedgehog, KDM1A - lysine…
GO:0010628	positive regulation of gene expression	0.00047	1.69	11755	772	387	43	[FOXJ1 - forkhead box j1, FOXE3 - forkhead box e3, MSX1 - msh homeobox 1, CREBBP - creb binding protein, RBM14 - rna binding motif protein 14, FOXF1 - forkhead box f1, ATOH1 - atonal homolog 1 (drosophila), PLAGL1 - pleiomorphic adenoma gene-like 1, ZBTB16 - zinc finger and btb domain containing 16, FOXF2 - forkhead box f2, T - t, brachyury homolog (mouse), OSM - oncostatin m, WT1 - wilms tumor 1…
GO:0008584	male gonad development	0.000517	4.26	11755	57	387	8	[LHX9 - lim homeobox 9, SOX8 - sry (sex determining region y)-box 8, BCL2 - b-cell cll/lymphoma 2, SFRP1 - secreted frizzled-related protein 1, UTF1 - undifferentiated embryonic cell transcription factor 1, GATA4 - gata binding protein 4, FANCA - fanconi anemia, complementation group a, WT1 - wilms tumor 1]
GO:0030510	regulation of BMP signaling pathway	0.000531	4.83	11755	44	387	7	[SFRP1 - secreted frizzled-related protein 1, MSX1 - msh homeobox 1, GATA4 - gata binding protein 4, VWC2 - von willebrand factor c domain containing 2, HTRA1 - htra serine peptidase 1, SOX11 - sry (sex determining region y)-box 11, CHRD - chordin]
GO:0050767	regulation of neurogenesis	0.000532	2.22	11755	287	387	21	[NUMB - numb homolog (drosophila), CHRNA3 - cholinergic receptor, nicotinic, alpha 3, LBX1 - ladybird homeobox 1, GDF11 - growth differentiation factor 11, VWC2 - von willebrand factor c domain containing 2, ATOH1 - atonal homolog 1 (drosophila), TLX3 - t-cell leukemia homeobox 3, DCC - deleted in colorectal carcinoma, TSPO - translocator protein (18kda), SOX11 - sry (sex determining region y)-bo…
GO:0002009	morphogenesis of an epithelium	0.000556	2.65	11755	172	387	15	[PAX8 - paired box 8, SFRP1 - secreted frizzled-related protein 1, SLC12A2 - solute carrier family 12 (sodium/potassium/chloride transporters), member 2, FOXF1 - forkhead box f1, T - t, brachyury homolog (mouse), SOX11 - sry (sex determining region y)-box 11, WT1 - wilms tumor 1, HOXD11 - homeobox d11, IHH - indian hedgehog, FRZB - frizzled-related protein, SOX8 - sry (sex determining region y)-b…
GO:0003007	heart morphogenesis	0.000638	5.52	11755	33	387	6	[MSX1 - msh homeobox 1, GATA4 - gata binding protein 4, TH - tyrosine hydroxylase, T - t, brachyury homolog (mouse), COL2A1 - collagen, type ii, alpha 1, NKX2-5 - nk2 transcription factor related, locus 5 (drosophila)]
GO:0051049	regulation of transport	0.000639	1.72	11755	689	387	39	[CHRNA3 - cholinergic receptor, nicotinic, alpha 3, TACR1 - tachykinin receptor 1, SH3GL2 - sh3-domain grb2-like 2, CACNA1H - calcium channel, voltage-dependent, t type, alpha 1h subunit, FOXF1 - forkhead box f1, CALY - calcyon neuron-specific vesicular protein, OSM - oncostatin m, KCNC4 - potassium voltage-gated channel, shaw-related subfamily, member 4, GNAO1 - guanine nucleotide binding protei…
GO:0001823	mesonephros development	0.000653	9.35	11755	13	387	4	[PAX8 - paired box 8, FGF10 - fibroblast growth factor 10, ZBTB16 - zinc finger and btb domain containing 16, WT1 - wilms tumor 1]
GO:0031103	axon regeneration	0.000653	9.35	11755	13	387	4	[BCL2 - b-cell cll/lymphoma 2, APOE - apolipoprotein e, CHST3 - carbohydrate (chondroitin 6) sulfotransferase 3, TSPO - translocator protein (18kda)]
GO:0003254	regulation of membrane depolarization	0.000653	9.35	11755	13	387	4	[CACNA1G - calcium channel, voltage-dependent, t type, alpha 1g subunit, BCL2 - b-cell cll/lymphoma 2, CCK - cholecystokinin, TSPO - translocator protein (18kda)]
GO:0023019	signal transduction involved in regulation of gene expression	0.000653	9.35	11755	13	387	4	[MSX1 - msh homeobox 1, GSC - goosecoid homeobox, GATA4 - gata binding protein 4, T - t, brachyury homolog (mouse)]
GO:0048664	neuron fate determination	0.000658	15.19	11755	6	387	3	[LBX1 - ladybird homeobox 1, NKX2-2 - nk2 homeobox 2, ATOH1 - atonal homolog 1 (drosophila)]
GO:0001822	kidney development	0.000667	3.41	11755	89	387	10	[PAX8 - paired box 8, BCL2 - b-cell cll/lymphoma 2, SLC5A1 - solute carrier family 5 (sodium/glucose cotransporter), member 1, FGF10 - fibroblast growth factor 10, GDF11 - growth differentiation factor 11, POU3F3 - pou class 3 homeobox 3, ZBTB16 - zinc finger and btb domain containing 16, SOX11 - sry (sex determining region y)-box 11, WT1 - wilms tumor 1, HOXD11 - homeobox d11]
GO:0051924	regulation of calcium ion transport	0.000719	3.15	11755	106	387	11	[CACNG6 - calcium channel, voltage-dependent, gamma subunit 6, BCL2 - b-cell cll/lymphoma 2, PTGS2 - prostaglandin-endoperoxide synthase 2 (prostaglandin g/h synthase and cyclooxygenase), CACNA2D1 - calcium channel, voltage-dependent, alpha 2/delta subunit 1, P2RX1 - purinergic receptor p2x, ligand-gated ion channel, 1, DRD2 - dopamine receptor d2, P2RX3 - purinergic receptor p2x, ligand-gated io…
GO:0050794	regulation of cellular process	0.000733	1.17	11755	5551	387	214	[LAMA2 - laminin, alpha 2, PKP1 - plakophilin 1 (ectodermal dysplasia/skin fragility syndrome), LAMA3 - laminin, alpha 3, PLAGL1 - pleiomorphic adenoma gene-like 1, BNIP3 - bcl2/adenovirus e1b 19kda interacting protein 3, HOXD11 - homeobox d11, ZNF624 - zinc finger protein 624, C19orf2 - chromosome 19 open reading frame 2, KIAA1324 - kiaa1324, GATA4 - gata binding protein 4, PITX2 - paired-like h…
GO:0015837	amine transport	0.000778	3.12	11755	107	387	11	[SLC32A1 - solute carrier family 32 (gaba vesicular transporter), member 1, SLC18A3 - solute carrier family 18 (vesicular acetylcholine), member 3, SLC7A1 - solute carrier family 7 (cationic amino acid transporter, y+ system), member 1, CPT1A - carnitine palmitoyltransferase 1a (liver), P2RX1 - purinergic receptor p2x, ligand-gated ion channel, 1, TH - tyrosine hydroxylase, SYK - spleen tyrosine …
GO:0065007	biological regulation	0.00078	1.15	11755	6168	387	234	[PKP1 - plakophilin 1 (ectodermal dysplasia/skin fragility syndrome), LAMA2 - laminin, alpha 2, LAMA3 - laminin, alpha 3, PLAGL1 - pleiomorphic adenoma gene-like 1, BNIP3 - bcl2/adenovirus e1b 19kda interacting protein 3, HOXD11 - homeobox d11, ZNF624 - zinc finger protein 624, C19orf2 - chromosome 19 open reading frame 2, KIAA1324 - kiaa1324, GATA4 - gata binding protein 4, PITX2 - paired-like h…
GO:0030154	cell differentiation	0.000826	1.55	11755	1038	387	53	[FOXJ1 - forkhead box j1, LBX1 - ladybird homeobox 1, NFATC4 - nuclear factor of activated t-cells, cytoplasmic, calcineurin-dependent 4, MSX1 - msh homeobox 1, FOXF1 - forkhead box f1, T - t, brachyury homolog (mouse), SEMA4D - sema domain, immunoglobulin domain (ig), transmembrane domain (tm) and short cytoplasmic domain, (semaphorin) 4d, BNIP3 - bcl2/adenovirus e1b 19kda interacting protein 3,…
GO:0007166	cell surface receptor linked signaling pathway	0.000881	1.46	11755	1396	387	67	[TACR1 - tachykinin receptor 1, PTGER2 - prostaglandin e receptor 2 (subtype ep2), 53kda, PTGER3 - prostaglandin e receptor 3 (subtype ep3), SH3GL2 - sh3-domain grb2-like 2, MSX1 - msh homeobox 1, FOXF1 - forkhead box f1, LGR5 - leucine-rich repeat-containing g protein-coupled receptor 5, CHRM1 - cholinergic receptor, muscarinic 1, T - t, brachyury homolog (mouse), GNAO1 - guanine nucleotide bind…
GO:0031325	positive regulation of cellular metabolic process	0.000894	1.49	11755	1243	387	61	[FOXJ1 - forkhead box j1, FOXE3 - forkhead box e3, MSX1 - msh homeobox 1, FOXF1 - forkhead box f1, ATOH1 - atonal homolog 1 (drosophila), PLAGL1 - pleiomorphic adenoma gene-like 1, T - t, brachyury homolog (mouse), FOXF2 - forkhead box f2, OSM - oncostatin m, SEMA4D - sema domain, immunoglobulin domain (ig), transmembrane domain (tm) and short cytoplasmic domain, (semaphorin) 4d, OTX2 - orthodent…
GO:0050789	regulation of biological process	0.000946	1.16	11755	5847	387	223	[LAMA2 - laminin, alpha 2, PKP1 - plakophilin 1 (ectodermal dysplasia/skin fragility syndrome), LAMA3 - laminin, alpha 3, PLAGL1 - pleiomorphic adenoma gene-like 1, BNIP3 - bcl2/adenovirus e1b 19kda interacting protein 3, HOXD11 - homeobox d11, ZNF624 - zinc finger protein 624, C19orf2 - chromosome 19 open reading frame 2, KIAA1324 - kiaa1324, GATA4 - gata binding protein 4, PITX2 - paired-like h…
GO:0009952	anterior/posterior pattern specification	0.000971	2.87	11755	127	387	12	[ALX4 - alx homeobox 4, PCDH8 - protocadherin 8, MSX1 - msh homeobox 1, GDF11 - growth differentiation factor 11, GATA4 - gata binding protein 4, FOXF1 - forkhead box f1, ZBTB16 - zinc finger and btb domain containing 16, T - t, brachyury homolog (mouse), WT1 - wilms tumor 1, TCF15 - transcription factor 15 (basic helix-loop-helix), HOXD11 - homeobox d11, CDX2 - caudal type homeobox 2]
