# Supplementary material for: DNA-Methylation Profiling of Fetal Tissues Reveals Marked Epigenetic Differences between Chorionic and Amniotic Samples
Source: PLoS One. 2012 Jun 19;7(6):e39014. doi: 10.1371/journal.pone.0039014 (PMC3378600; doi:10.1371/journal.pone.0039014)
Supplement: Table S4 — DNA methylation values (avg.beta and normalized data) of loci differentially aberrantly methylated in trisomy 21 (sheet 1) and trisomy 18 (sheet 2). Data from CVS (trisomy and CVS) as well as from peripheral blood samples from normal female and male donors are included. (XLS) [file pone.0039014.s009.xls]

## Sheet: T21Loci-peripheral blood
				avg.beta (not normalized)
				normal peripheral blood controls (female)											normal peripheral blood controls (male)											CVS samples (not normalized
TargetID	SYMBOL	CHR	MAPINFO	femal1.AVG_Beta	femal2.AVG_Beta	femal3.AVG_Beta	femal4.AVG_Beta	femal5.AVG_Beta	femal6.AVG_Beta	femal7.AVG_Beta	femal8.AVG_Beta	femal9.AVG_Beta	femal10.AVG_Beta		male1.AVG_Beta	male2.AVG_Beta	male3.AVG_Beta	male4.AVG_Beta	male5.AVG_Beta	male6.AVG_Beta	male7.AVG_Beta	male8.AVG_Beta	male9.AVG_Beta	male10.AVG_Beta		CV1.AVG_Beta	CV3.AVG_Beta	CV4.AVG_Beta	CV5.AVG_Beta	CV6.AVG_Beta	CV7.AVG_Beta	CV8.AVG_Beta	CV9.AVG_Beta	CV10.AVG_Beta	CV11.AVG_Beta	CV12.AVG_Beta	CV14.AVG_Beta	CV15.AVG_Beta	CV17.AVG_Beta	CV18.AVG_Beta	CV21.AVG_Beta	CV27.AVG_Beta	CV28.AVG_Beta	CV26.AVG_Beta	CVB4.AVG_Beta	CVB5.AVG_Beta	CVB8.AVG_Beta	CVB9.AVG_Beta	CVB10.AVG_Beta
cg00044245	EPHA7	6	94185610	0.0598914	0.104309	0.0843661	0.0675413	0.0765466	0.086139	0.0987749	0.0674975	0.0552999	0.0743474		0.0853805	0.0602457	0.0852099	0.0803183	0.0638925	0.0477645	0.0585835	0.0521908	0.0753634	0.0453437		0.115954	0.107804	0.16519	0.14857	0.108934	0.173757	0.1033	0.122439	0.141234	0.117692	0.246431	0.10835	0.0894003	0.0937229	0.121741	0.204781	0.109593	0.16408	0.101799	0.0881027	0.0901051	0.113328	0.150067	0.0900552
cg00221494	FARP1	13	97592594	0.0171744	0.0250644	0.0182153	0.0204744	0.0175285	0.0275431	0.023159	0.0145213	0.0110039	0.0225516		0.0170982	0.0226207	0.0385604	0.014756	0.0206309	0.0118546	0.016487	0.0216299	0.0215471	0.015463		0.121701	0.179288	0.22846	0.20959	0.125427	0.220797	0.235686	0.26412	0.192427	0.260977	0.196529	0.111939	0.168597	0.168893	0.188482	0.178129	0.164194	0.177362	0.184029	0.20007	0.200103	0.16217	0.213894	0.173795
cg00333226	UNQ739	7	49784309	0.111748	0.197292	0.140791	0.113693	0.127162	0.211305	0.219592	0.131577	0.0836709	0.133081		0.170078	0.143337	0.129879	0.121152	0.0948236	0.0870372	0.0844524	0.108983	0.147738	0.113902		0.288547	0.349412	0.316698	0.275503	0.274793	0.298749	0.31879	0.438861	0.304706	0.44513	0.411171	0.210194	0.457857	0.573847	0.308592	0.388458	0.251892	0.422604	0.50141	0.425119	0.342699	0.35173	0.409505	0.459528
cg00343092	BZRP	22	41877918	0.0583302	0.0356079	0.0775028	0.0723958	0.0214652	0.0181659	0.0272189	0.0242659	0.0312739	0.0624514		0.0243296	0.0382322	0.034496	0.0418939	0.0543943	0.0712182	0.0389477	0.0204529	0.0299652	0.0265601		0.229295	0.206752	0.22195	0.177575	0.191817	0.274708	0.244629	0.236708	0.255883	0.195016	0.242447	0.148174	0.20907	0.308565	0.259529	0.150045	0.226331	0.182673	0.221342	0.221578	0.244053	0.219927	0.203685	0.135171
cg00344358	GDF11	12	54421960	0.920369	0.922083	0.933952	0.954286	0.933159	0.948742	0.91405	0.943983	0.931968	0.938084		0.934834	0.937795	0.928908	0.928103	0.927617	0.927456	0.94391	0.943463	0.938485	0.93477		0.618999	0.652377	0.691759	0.619306	0.526214	0.653379	0.540918	0.630765	0.609115	0.650924	0.68843	0.609856	0.738559	0.662377	0.582746	0.620241	0.520291	0.678703	0.670494	0.693863	0.646277	0.605342	0.591703	0.617521
cg00499599	MCM3AP	21	46530820	0.0185185	0.0286628	0.0227393	0.0253802	0.0214928	0.0205168	0.0151918	0.0161652	0.0148796	0.0179215		0.0209016	0.0214109	0.0224915	0.0215591	0.0241743	0.0161411	0.0189405	0.0171295	0.0230755	0.0160376		0.0686031	0.076307	0.0720472	0.0978381	0.0999781	0.0791573	0.0805121	0.0663507	0.0827207	0.0668042	0.0646528	0.0659873	0.0660811	0.0751636	0.0790812	0.0649662	0.0827714	0.095301	0.0514726	0.0662862	0.106306	0.125054	0.107612	0.0858173
cg00499822	CXCL12	10	44201557	0.166804	0.189983	0.135281	0.148766	0.0973409	0.112832	0.18122	0.104455	0.101	0.106254		0.153912	0.0865633	0.126577	0.189341	0.116945	0.12647	0.0794001	0.05837	0.10695	0.0913112		0.542668	0.490913	0.631626	0.473135	0.582028	0.636153	0.743887	0.610859	0.588504	0.58163	0.500158	0.580723	0.532167	0.604226	0.530543	0.643521	0.496306	0.671523	0.521854	0.602968	0.620357	0.573773	0.624113	0.58491
cg00548268	NPTX2	7	98083766	0.347455	0.541988	0.588837	0.457595	0.410326	0.547905	0.475527	0.356556	0.426767	0.447721		0.418054	0.408357	0.585364	0.537985	0.435473	0.311684	0.271194	0.371201	0.453526	0.561918		0.363609	0.384483	0.523383	0.34575	0.257397	0.445969	0.387709	0.553431	0.461948	0.429631	0.374641	0.418211	0.559721	0.508253	0.361505	0.391071	0.301326	0.328305	0.624387	0.492308	0.379939	0.373149	0.414088	0.52148
cg00638514	OTOP3	17	70443643	0.0556043	0.113153	0.0654161	0.0524399	0.0630252	0.059124	0.098649	0.0632554	0.0471274	0.0482608		0.0689742	0.0433147	0.0653448	0.0479217	0.0500371	0.056642	0.0309557	0.0503197	0.0823458	0.0301018		0.0758248	0.069178	0.106053	0.0904639	0.073566	0.204152	0.0971791	0.118697	0.100728	0.117411	0.114428	0.119445	0.129156	0.20139	0.122217	0.0843858	0.0908007	0.0997936	0.120911	0.108254	0.11341	0.110623	0.122274	0.128169
cg00665395	TTLL4	2	219283734	0.0323417	0.0418023	0.0341063	0.0411999	0.0375587	0.0201865	0.0395235	0.0290401	0.024905	0.0308141		0.0337309	0.037695	0.0348996	0.046707	0.0281181	0.0265906	0.0241723	0.025127	0.0379497	0.0221628		0.0815782	0.0638175	0.066824	0.0770242	0.06141	0.069209	0.080886	0.0626338	0.0540786	0.0585224	0.054089	0.0650004	0.0521632	0.0733857	0.0689389	0.042328	0.0658611	0.0579975	0.0623721	0.0586691	0.0778594	0.0687898	0.0832774	0.0825204
cg00718748	ZNF624	17	16497596	0.021038	0.023752	0.0222017	0.015498	0.0290533	0.0174213	0.023587	0.014456	0.0196168	0.0225154		0.0257775	0.0194168	0.0199781	0.0292143	0.0197683	0.0226882	0.0162602	0.0203077	0.0255841	0.0205008		0.0646344	0.0659018	0.0541313	0.0808928	0.0614751	0.0860966	0.05877	0.059777	0.0604102	0.0467843	0.0521999	0.0476943	0.0604697	0.0547862	0.0777438	0.0534541	0.0566333	0.0715508	0.0540426	0.0607962	0.0814435	0.0742742	0.0928076	0.0542174
cg00815440	UQCRFS1	19	34395868	0.00854322	0.00796858	0.00609436	0.011388	0.00582266	0.00541377	0.00598122	0.00765353	0.00581827	0.00900763		0.0124649	0.0122476	0.00707579	0.00638484	0.00567347	0.00760269	0.00606401	0.00707828	0.00813906	0.00737367		0.0454673	0.0381543	0.035217	0.0476951	0.0338659	0.0416738	0.0398809	0.029703	0.0432637	0.0338731	0.036173	0.0367898	0.0372778	0.0339908	0.0543532	0.0284744	0.0351086	0.045608	0.0337154	0.0211955	0.0506983	0.045514	0.050189	0.0415376
cg00853068	FMNL1	17	40654375	0.0551126	0.0694543	0.0657554	0.0585714	0.0564004	0.0397954	0.0655461	0.06229	0.0517931	0.0585175		0.0791446	0.0914716	0.0622766	0.0531888	0.0668848	0.054575	0.0532539	0.0533734	0.090865	0.0481416		0.625597	0.511093	0.643109	0.416969	0.502564	0.627825	0.64757	0.549842	0.473773	0.525389	0.577634	0.48424	0.590909	0.534065	0.625523	0.534865	0.514599	0.550087	0.538959	0.538579	0.511954	0.580617	0.503848	0.558123
cg00949442	ABCA3	16	2331829	0.0961112	0.130075	0.0889271	0.0846906	0.0906045	0.149943	0.144582	0.0573017	0.120491	0.0915663		0.096973	0.106775	0.137787	0.0802	0.0848046	0.0866815	0.0718808	0.117718	0.103886	0.0633333		0.194632	0.172358	0.179906	0.177494	0.0895697	0.183409	0.152793	0.298718	0.154707	0.452942	0.118622	0.116979	0.231916	0.17585	0.179939	0.169574	0.142723	0.206736	0.22016	0.220907	0.37299	0.229885	0.360877	0.244319
cg00969271	ORM2	9	116132873	0.932515	0.9349	0.936675	0.955218	0.944595	0.924569	0.941681	0.948403	0.92377	0.935548		0.934325	0.926461	0.913174	0.94157	0.949771	0.939671	0.950801	0.953243	0.944352	0.969866		0.768555	0.735464	0.823377	0.795557	0.771958	0.796173	0.799114	0.814948	0.769672	0.769578	0.797423	0.754024	0.813006	0.773406	0.796877	0.743889	0.74304	0.784632	0.830147	0.761023	0.798265	0.690405	0.754654	0.72905
cg00987015	CHRM1	11	62445327	0.844576	0.795952	0.81458	0.815377	0.858978	0.86133	0.832978	0.839639	0.797892	0.797237		0.799168	0.833978	0.814832	0.750488	0.801694	0.802917	0.80652	0.805617	0.815878	0.775388		0.517358	0.590803	0.540086	0.61039	0.548708	0.571202	0.525105	0.569593	0.590851	0.596704	0.589572	0.57359	0.612217	0.619219	0.54153	0.56939	0.582493	0.607568	0.600784	0.552462	0.586155	0.560897	0.534475	0.59084
cg00995520	KCNA3	1	111019805	0.541703	0.546581	0.517204	0.414955	0.52627	0.702623	0.442038	0.434117	0.433588	0.43892		0.447097	0.341738	0.43475	0.297427	0.295677	0.445997	0.530079	0.359602	0.491626	0.230541		0.266326	0.281096	0.288194	0.3152	0.272272	0.25037	0.284376	0.271041	0.310047	0.356592	0.367251	0.224956	0.321238	0.277033	0.286811	0.355291	0.330914	0.399886	0.312645	0.289096	0.339312	0.293021	0.280787	0.334134
cg01114088	CYTL1	4	5072012	0.151565	0.0656168	0.0861358	0.060314	0.0681622	0.0940982	0.143343	0.112502	0.10205	0.0608009		0.0611865	0.0757576	0.0910796	0.0379374	0.0704319	0.0586207	0.141097	0.112265	0.0877005	0.0523306		0.349801	0.275137	0.275104	0.344871	0.422409	0.344153	0.359981	0.296767	0.287298	0.360434	0.359611	0.242793	0.389983	0.31316	0.211344	0.22974	0.207373	0.247049	0.386087	0.253044	0.352704	0.247927	0.332369	0.359073
cg01137532	ZNF365	10	63803894	0.0117286	0.0118201	0.00851064	0.0106849	0.0144789	0.0117172	0.0172391	0.0149458	0.012968	0.0118367		0.0172463	0.0250757	0.0177379	0.00729834	0.00921706	0.0201742	0.0127637	0.0109235	0.0117734	0.0118166		0.0530143	0.0458924	0.0390891	0.0577808	0.0493855	0.0592399	0.067903	0.0394866	0.0513018	0.0459	0.0565241	0.0412455	0.0437036	0.04376	0.0828204	0.0447853	0.056993	0.0570801	0.0470958	0.023736	0.0650164	0.0724314	0.072301	0.0378677
cg01214209	MANEAL	1	38031582	0.825964	0.873025	0.810613	0.810603	0.824442	0.865934	0.8077	0.842577	0.843152	0.806129		0.864149	0.840085	0.829613	0.688756	0.857219	0.885043	0.809556	0.851752	0.80067	0.878367		0.443765	0.458299	0.439292	0.478326	0.478997	0.521624	0.482662	0.545943	0.51541	0.501374	0.550496	0.449542	0.479147	0.508516	0.474935	0.507076	0.441275	0.514652	0.462208	0.586074	0.555953	0.464734	0.538335	0.478126
cg01291404	COL2A1	12	46684139	0.0225888	0.0316034	0.0156116	0.0196729	0.0285023	0.0266257	0.0260643	0.0194942	0.0227826	0.0181116		0.0180486	0.030303	0.0221998	0.0184951	0.0183092	0.0171301	0.0223507	0.0255906	0.0340194	0.0344828		0.0877193	0.0832059	0.0750132	0.125815	0.0885203	0.0908329	0.105044	0.0724076	0.0814246	0.106903	0.0812227	0.0950518	0.0638646	0.0868244	0.130132	0.0750472	0.0821086	0.0860044	0.0699172	0.0829111	0.129377	0.115556	0.146681	0.113035
cg01294702	FOXJ1	17	71648573	0.11903	0.0990912	0.100289	0.137521	0.114401	0.0992703	0.123205	0.0928255	0.100937	0.142553		0.108753	0.102459	0.13891	0.099306	0.123054	0.0794321	0.0699966	0.0796873	0.102809	0.0743318		0.374455	0.33394	0.440439	0.326733	0.325479	0.321027	0.398007	0.435932	0.355383	0.368008	0.422164	0.339557	0.304387	0.360364	0.459386	0.388711	0.277175	0.413165	0.393474	0.360302	0.353543	0.377049	0.364881	0.340614
cg01295203	PRDM14	8	71146753	0.0275276	0.0498074	0.0243208	0.0287545	0.0333832	0.0480084	0.0608045	0.0394822	0.0249497	0.0572048		0.0575843	0.0984529	0.0354438	0.0250417	0.0272177	0.0265951	0.0308597	0.036544	0.0489501	0.0206311		0.0754158	0.0751377	0.167849	0.076815	0.0543918	0.254201	0.0765494	0.163008	0.238295	0.182193	0.0566124	0.05973	0.222704	0.290867	0.0898167	0.0809133	0.0575181	0.0819404	0.264261	0.26088	0.113663	0.127565	0.0805002	0.186396
cg01344452	DGKE	17	52267142	0.00806003	0.00894855	0.00911502	0.00984482	0.00729679	0.0109368	0.00662414	0.00523821	0.00803158	0.00659176		0.0114347	0.0126457	0.0067391	0.00988924	0.0114984	0.0137293	0.0151369	0.0066166	0.00863931	0.0133487		0.0552106	0.0487356	0.0720388	0.0781893	0.0456481	0.11786	0.0534156	0.159146	0.102992	0.107705	0.0430316	0.0406915	0.0946237	0.0539099	0.0658496	0.0758682	0.0537333	0.0865295	0.0848279	0.100545	0.074039	0.177158	0.0793026	0.0878332
cg01424107	CDX2	13	27441113	0.01464	0.0250675	0.0167785	0.0254927	0.013149	0.037123	0.0208017	0.0220254	0.0145713	0.0220445		0.0315043	0.0291642	0.0126804	0.0238218	0.0249263	0.0168572	0.0247197	0.0126121	0.0174843	0.0280093		0.0747853	0.0636305	0.0599849	0.0727768	0.0641905	0.0712446	0.0720656	0.17132	0.106313	0.138941	0.202128	0.06045	0.0678499	0.0595634	0.0932666	0.0533265	0.0566491	0.0706874	0.0561639	0.0871849	0.123005	0.102194	0.111743	0.0763479
cg01425670	NEGR1	1	72521603	0.0127523	0.0130274	0.0158639	0.0123959	0.0117148	0.00793385	0.0275884	0.00972206	0.0101866	0.0122081		0.0161679	0.0163664	0.0156402	0.0135516	0.01052	0.0104616	0.00919255	0.00894753	0.0169043	0.0105072		0.0593455	0.0574809	0.0520915	0.0799109	0.042987	0.0602015	0.0486638	0.0500861	0.0479372	0.043728	0.0500758	0.0497639	0.0708302	0.0649946	0.0463464	0.0455419	0.0537389	0.0589693	0.0462746	0.0332488	0.054604	0.0428752	0.0533371	0.0305482
cg01443630	CLCN7	16	1465699	0.900023	0.901618	0.941017	0.896389	0.883382	0.922566	0.876108	0.886263	0.887748	0.892793		0.914581	0.865422	0.843068	0.916205	0.920607	0.890378	0.896225	0.886347	0.839705	0.950715		0.543808	0.527324	0.55192	0.439152	0.445072	0.461003	0.717426	0.57451	0.578165	0.56336	0.615719	0.471252	0.602692	0.525922	0.473366	0.409393	0.4939	0.433546	0.520362	0.409197	0.404559	0.531948	0.481978	0.406519
cg01493517	HOM-TES-103	12	6535708	0.156372	0.160471	0.123665	0.136723	0.15547	0.0836812	0.15771	0.113891	0.178881	0.178635		0.131246	0.133411	0.12416	0.146907	0.157145	0.150942	0.138372	0.120795	0.120669	0.0723485		0.538051	0.570157	0.620016	0.325459	0.413499	0.342645	0.315689	0.445485	0.338023	0.563304	0.423603	0.38664	0.317278	0.334306	0.324745	0.370687	0.434459	0.449361	0.350839	0.4157	0.39715	0.448376	0.408279	0.305547
cg01526089	P2RX1	17	3766139	0.569865	0.589851	0.508404	0.508836	0.45566	0.661992	0.499133	0.597925	0.445089	0.539385		0.588734	0.528223	0.494154	0.501221	0.510493	0.456429	0.437551	0.557656	0.532491	0.476972		0.803485	0.855934	0.844613	0.740758	0.841561	0.786703	0.900562	0.814898	0.786156	0.809821	0.848115	0.839245	0.857573	0.814315	0.876532	0.868406	0.842323	0.87654	0.840926	0.894675	0.902287	0.922094	0.88872	0.858626
cg01717150	KCNK9	8	140785677	0.025517	0.0320937	0.0240253	0.0193067	0.0249772	0.0157675	0.036287	0.0248403	0.0208197	0.0195059		0.046497	0.0211973	0.0232573	0.0263086	0.0242984	0.0228947	0.0148193	0.0152979	0.0250937	0.0178619		0.0777744	0.130672	0.0722049	0.10052	0.0634773	0.0835279	0.09083	0.108865	0.0835589	0.149824	0.100295	0.066581	0.0787183	0.084028	0.0639546	0.0550131	0.0833861	0.0667983	0.0629248	0.0736338	0.0890037	0.0815647	0.194178	0.0806842
cg01836044	PCDH20	13	60887204	0.0180531	0.0391128	0.0324469	0.022587	0.0178471	0.0375643	0.0368335	0.0367724	0.0241834	0.0292597		0.0331188	0.0288208	0.0320173	0.0248762	0.0300296	0.023484	0.0277416	0.0272896	0.0340468	0.0222006		0.121385	0.138732	0.0930381	0.146212	0.0911305	0.14676	0.122926	0.104145	0.116803	0.0850832	0.155299	0.0882795	0.0884982	0.17018	0.106187	0.085055	0.133148	0.0992882	0.0936955	0.124592	0.197223	0.117784	0.189336	0.146437
cg01839464	DCC	18	48122475	0.049446	0.142288	0.0787707	0.0750318	0.0631304	0.10366	0.123933	0.0521095	0.0907943	0.071496		0.110789	0.0664952	0.117309	0.0711337	0.0712937	0.0514591	0.0652174	0.0576342	0.105823	0.0569347		0.121673	0.146234	0.264308	0.129043	0.11625	0.160155	0.176148	0.228916	0.186116	0.154036	0.115978	0.166691	0.144326	0.150022	0.127689	0.175871	0.134931	0.219435	0.131275	0.169231	0.138315	0.21521	0.224305	0.191569
cg01853981	KRT6IRS	12	51232749	0.941599	0.920893	0.924444	0.934981	0.92397	0.948685	0.937535	0.940441	0.944314	0.930746		0.919952	0.93119	0.931584	0.922175	0.944149	0.937241	0.916346	0.942467	0.934402	0.934088		0.843969	0.684846	0.890182	0.841101	0.779909	0.812126	0.837454	0.895568	0.839115	0.827059	0.854783	0.857698	0.889445	0.798282	0.80015	0.778132	0.754595	0.760456	0.867372	0.726442	0.785285	0.704762	0.752039	0.807697
cg02008544	TNFRSF10B	8	22982545	0.0272011	0.0440131	0.0364934	0.0176622	0.0239132	0.0326301	0.0531915	0.0380083	0.019876	0.0288308		0.0355762	0.0414554	0.0311845	0.0455702	0.0392982	0.0312935	0.0287536	0.0256192	0.0417772	0.0184341		0.107523	0.0976414	0.106425	0.114867	0.0705979	0.168719	0.149243	0.154803	0.0900278	0.0851064	0.111551	0.095525	0.087674	0.0855044	0.0832135	0.0693239	0.0927577	0.0924922	0.08946	0.164041	0.0887252	0.0783753	0.274583	0.0973594
cg02166532	IGF2	11	2116429	0.131265	0.255148	0.156246	0.200685	0.161778	0.223139	0.221102	0.258757	0.207105	0.348119		0.220403	0.125507	0.239943	0.151811	0.196842	0.183283	0.123359	0.136555	0.292301	0.173504		0.177913	0.143181	0.142976	0.129751	0.168404	0.168582	0.117392	0.167428	0.187771	0.128627	0.140946	0.155313	0.174206	0.168435	0.12272	0.124851	0.141847	0.118891	0.116423	0.175696	0.169644	0.150374	0.155302	0.145816
cg02244695	HCA112	7	150128279	0.0428673	0.059375	0.0612882	0.0604946	0.0508305	0.0342989	0.0775098	0.0541775	0.0466255	0.0690846		0.0791053	0.056028	0.0598197	0.0475727	0.0518965	0.0345916	0.0317914	0.0289334	0.0302385	0.0557029		0.63602	0.601284	0.610566	0.488039	0.621974	0.583786	0.642262	0.663503	0.570999	0.667309	0.709487	0.575426	0.602566	0.565933	0.6325	0.631528	0.46113	0.646446	0.594558	0.748391	0.590826	0.6756	0.630014	0.8255
cg02324920	NEURL	10	105243142	0.809129	0.794243	0.812844	0.821504	0.790149	0.822242	0.798812	0.775787	0.799969	0.829989		0.817551	0.803611	0.773459	0.731483	0.782749	0.832223	0.797176	0.81315	0.746441	0.792084		0.601051	0.661982	0.690312	0.613756	0.586693	0.673899	0.696242	0.711431	0.641373	0.690694	0.716385	0.684708	0.669199	0.679114	0.709734	0.647479	0.641492	0.676439	0.610527	0.632166	0.627635	0.706538	0.670799	0.609879
cg02330106	MGMT	10	131154830	0.820197	0.870963	0.827539	0.851793	0.814143	0.843716	0.787334	0.811386	0.819337	0.836841		0.846548	0.840414	0.802349	0.569695	0.782594	0.849802	0.815058	0.733608	0.8365	0.774041		0.760998	0.643038	0.727022	0.726123	0.733226	0.790358	0.767897	0.730695	0.84101	0.780372	0.779585	0.770305	0.814669	0.790552	0.747572	0.70828	0.716458	0.732036	0.829141	0.758367	0.757871	0.679067	0.723096	0.701999
cg02431687	C9orf90	9	129868473	0.875267	0.882036	0.874459	0.849984	0.853232	0.918496	0.891028	0.837728	0.887165	0.856943		0.871684	0.859928	0.88967	0.869064	0.912503	0.885038	0.868831	0.923578	0.84449	0.88777		0.895339	0.918116	0.951137	0.884332	0.911177	0.897478	0.913602	0.912074	0.897391	0.925534	0.910548	0.914079	0.922039	0.91695	0.89645	0.924255	0.903667	0.886221	0.927966	0.895269	0.881658	0.882782	0.891068	0.88698
cg02436686	GMFG	19	44517990	0.0936705	0.0935621	0.094806	0.0958706	0.123851	0.0646744	0.116246	0.0973236	0.0861754	0.0881867		0.0950481	0.0852319	0.0933693	0.0915862	0.0888113	0.0848153	0.0723612	0.0545377	0.1117	0.062828		0.502464	0.538541	0.571881	0.528659	0.517604	0.525244	0.568312	0.535526	0.544087	0.52998	0.587285	0.46204	0.51421	0.574864	0.538153	0.536708	0.529156	0.545991	0.592839	0.571318	0.556359	0.537154	0.492001	0.535365
cg02501779	CBLN4	20	54012762	0.039369	0.0847523	0.043418	0.0461147	0.0734309	0.0758188	0.0836961	0.0553726	0.0523798	0.0481946		0.075807	0.0521083	0.053967	0.0557988	0.0466741	0.0435123	0.0398809	0.0357029	0.0418167	0.0569366		0.104265	0.112028	0.183307	0.135762	0.127857	0.248039	0.140059	0.163605	0.11456	0.20184	0.168663	0.20514	0.174213	0.187044	0.172711	0.138703	0.134485	0.163654	0.17909	0.158271	0.217235	0.230169	0.267021	0.231758
cg02661879	FLNC	7	128257850	0.0138057	0.0123415	0.0140701	0.0121914	0.0118106	0.0166368	0.0131093	0.0153007	0.00876637	0.0248553		0.0203764	0.0226231	0.0152928	0.0116553	0.0146463	0.0121869	0.0130336	0.00938488	0.0197425	0.0185672		0.0803303	0.0577617	0.0715953	0.0648578	0.0592038	0.0823269	0.0888976	0.0712858	0.0669029	0.0757426	0.0568577	0.0607407	0.0558393	0.0666894	0.0697405	0.0443211	0.0599082	0.0810785	0.0502182	0.0355167	0.0629714	0.0740038	0.0864718	0.0646987
cg02672493	TMEM22	3	138020399	0.0543499	0.0425908	0.0351098	0.0388252	0.0372975	0.0267946	0.0364522	0.036994	0.0287188	0.0326485		0.0463333	0.0268721	0.0314169	0.0295275	0.03171	0.0219566	0.023331	0.0238195	0.0189089	0.0275405		0.219422	0.238854	0.315777	0.214584	0.228869	0.303305	0.219256	0.315715	0.228029	0.457867	0.292275	0.257367	0.34362	0.311608	0.243954	0.243717	0.153805	0.326392	0.338616	0.295598	0.450289	0.426012	0.36987	0.297841
cg02727423	EML1	14	99328726	0.48118	0.433107	0.425835	0.445012	0.492219	0.456042	0.451414	0.355979	0.463334	0.534884		0.445265	0.363906	0.447313	0.45662	0.462944	0.489885	0.549049	0.460629	0.42819	0.399674		0.674692	0.73007	0.775309	0.637787	0.732892	0.63688	0.75806	0.677405	0.648188	0.704739	0.736476	0.752882	0.71955	0.68727	0.683695	0.709718	0.66088	0.710345	0.709702	0.749778	0.751243	0.699091	0.687924	0.704795
cg02765328	CCND2	12	4253542	0.0448503	0.0443124	0.0734225	0.0475619	0.036823	0.036714	0.0429307	0.0605217	0.0345802	0.0888286		0.041057	0.0561861	0.0391978	0.0914336	0.0502483	0.0472897	0.0448431	0.0270066	0.0540624	0.0466667		0.0904963	0.114634	0.126398	0.107998	0.088914	0.168028	0.0906126	0.172631	0.125042	0.164576	0.138039	0.0988865	0.16967	0.136783	0.120024	0.0800374	0.102352	0.104575	0.138855	0.139708	0.169809	0.0886347	0.168877	0.0857173
cg02859934	NAGPA	16	5023073	0.443846	0.455118	0.469038	0.467836	0.33408	0.447472	0.414382	0.457266	0.295025	0.475906		0.309569	0.329631	0.393675	0.403846	0.392513	0.453157	0.400716	0.467871	0.453184	0.318072		0.110923	0.128097	0.0927759	0.136764	0.122253	0.16271	0.144252	0.129839	0.159111	0.132656	0.172483	0.0898422	0.125709	0.143779	0.151201	0.114613	0.131958	0.135971	0.134146	0.113743	0.140823	0.117093	0.148293	0.131237
cg02899772	EFCBP2	16	82560100	0.0498203	0.109828	0.060821	0.0452231	0.0532207	0.0484787	0.0761191	0.0548286	0.0654941	0.0481642		0.0685714	0.0664757	0.042517	0.0575312	0.0721291	0.0692151	0.0389159	0.0482098	0.0526919	0.037798		0.0927895	0.0809524	0.109315	0.110884	0.0606691	0.102936	0.0965398	0.0868388	0.0891301	0.0956032	0.103956	0.0745275	0.110225	0.0901827	0.0923205	0.0729236	0.0648462	0.0840657	0.101152	0.108804	0.146604	0.136598	0.161321	0.131365
cg02932669	VGCNL1	13	100866259	0.0704928	0.0865452	0.0926125	0.0743161	0.0830158	0.0930711	0.0972992	0.131778	0.101089	0.114345		0.106645	0.0690146	0.146134	0.0641873	0.111111	0.0893471	0.140648	0.061811	0.16244	0.0520173		0.386047	0.495223	0.48192	0.424192	0.347983	0.474424	0.526383	0.459793	0.48638	0.617696	0.513255	0.492643	0.488838	0.477111	0.40022	0.549952	0.399328	0.575737	0.465528	0.446484	0.569207	0.58359	0.508444	0.65073
cg03048535	FOXN4	12	108231483	0.0116236	0.0134041	0.0149582	0.0119997	0.0138522	0.0112491	0.0232378	0.0163235	0.0131455	0.0143973		0.020707	0.0165506	0.0123188	0.0164659	0.017472	0.0158083	0.00979887	0.0153025	0.0133628	0.00768188		0.0508519	0.0391564	0.0442681	0.0421525	0.0366084	0.0519017	0.0366606	0.0433955	0.0353007	0.0466014	0.0489483	0.035681	0.0253596	0.0456115	0.0452489	0.0374324	0.0437292	0.0459573	0.0335188	0.0237335	0.046196	0.0593364	0.0498326	0.0276656
cg03160815	NPB	17	77453122	0.118807	0.223966	0.130498	0.0832932	0.220249	0.145608	0.212284	0.145747	0.176096	0.149765		0.156975	0.0908719	0.133269	0.186006	0.109003	0.176804	0.083644	0.118371	0.178558	0.117836		0.0660338	0.063173	0.119942	0.0749931	0.0421762	0.0664365	0.0692878	0.0534212	0.058349	0.0548395	0.0481137	0.0469703	0.0510317	0.0538634	0.048065	0.0430809	0.0461596	0.0501988	0.0418149	0.0424386	0.0620696	0.0519523	0.0590655	0.0291597
cg03167763	UBXD3	1	20384984	0.0958476	0.0812332	0.0810931	0.094257	0.078526	0.125119	0.0813407	0.124864	0.0812636	0.0708027		0.100608	0.0757413	0.0837738	0.0869565	0.0803738	0.0702728	0.110674	0.0718599	0.104402	0.0632585		0.271973	0.224125	0.274671	0.219123	0.171749	0.219445	0.180995	0.263711	0.239519	0.232174	0.198898	0.215671	0.245616	0.155387	0.246265	0.164643	0.155815	0.166446	0.227459	0.15365	0.238348	0.288035	0.231099	0.218021
cg03202897	FAM50B	6	3794687	0.610403	0.611391	0.626454	0.635353	0.63416	0.635402	0.596867	0.646274	0.593823	0.6427		0.554303	0.613525	0.640851	0.649257	0.625477	0.595317	0.63536	0.611896	0.669762	0.681611		0.648409	0.606834	0.61705	0.559571	0.577442	0.610609	0.649886	0.557067	0.614062	0.614688	0.651151	0.596884	0.653165	0.641083	0.585472	0.638274	0.534466	0.579581	0.577712	0.595474	0.602913	0.673577	0.610862	0.638447
cg03238797	ADAMTS18	16	76026394	0.0261833	0.088045	0.0266696	0.0397037	0.0374494	0.0238095	0.0523209	0.0406987	0.0208879	0.0613874		0.0486767	0.0351494	0.0487649	0.033988	0.0286702	0.0195114	0.0427096	0.02096	0.0485199	0.0248553		0.0849686	0.0644328	0.0588286	0.0773414	0.0535334	0.0913919	0.0959837	0.0591921	0.0464583	0.0716025	0.0708117	0.0615477	0.0565647	0.0710524	0.0656979	0.0462067	0.0667314	0.0622413	0.0355566	0.0660858	0.0909685	0.104016	0.0776384	0.0927135
cg03264209	CREBBP	16	3871886	0.687026	0.641286	0.708721	0.673914	0.651474	0.771834	0.678979	0.722219	0.628417	0.705362		0.687847	0.722583	0.660064	0.555631	0.704945	0.701811	0.637467	0.80137	0.658576	0.578248		0.422718	0.496338	0.505531	0.405132	0.413911	0.473805	0.552076	0.458728	0.436427	0.494378	0.485002	0.400095	0.472754	0.468577	0.404143	0.378351	0.389074	0.382351	0.497434	0.467237	0.411373	0.383738	0.371136	0.351052
cg03285457	LBX1	10	102978519	0.0328524	0.0737335	0.0336624	0.0376045	0.0449883	0.0454032	0.0650514	0.0644391	0.0386391	0.0501782		0.0474878	0.0421429	0.0532199	0.0655625	0.0429169	0.0342324	0.0454131	0.0304369	0.0588679	0.0515447		0.135314	0.0988722	0.101681	0.117739	0.0772275	0.178495	0.121202	0.212582	0.104023	0.173335	0.114933	0.0983359	0.147392	0.111046	0.154353	0.111931	0.0932462	0.12666	0.145309	0.0918018	0.147999	0.199866	0.1471	0.0983862
cg03289872	ZNF667	19	61680914	0.0183132	0.0487383	0.0305373	0.0218265	0.044755	0.0477387	0.0414183	0.0363673	0.0251869	0.0232596		0.0599775	0.0524332	0.021434	0.0428628	0.0215295	0.0184469	0.0203147	0.0342466	0.0269316	0.0203046		0.0813366	0.0560008	0.0594766	0.0910765	0.0581525	0.0596546	0.0718883	0.0506702	0.0753198	0.0406531	0.06	0.0672495	0.0745674	0.0767529	0.0777105	0.0431408	0.0534974	0.0571262	0.0626474	0.0735398	0.0983494	0.104061	0.0743161	0.115221
cg03294619	NKX2-5	5	172594409	0.0131345	0.0114679	0.0113674	0.00949885	0.0107623	0.0211581	0.0150896	0.0136828	0.0132545	0.0163447		0.0171278	0.0160895	0.00925031	0.0160903	0.0187349	0.00570459	0.0180878	0.0123613	0.0201405	0.0192369		0.0912077	0.05995	0.10785	0.0747141	0.0622088	0.0865397	0.178657	0.144961	0.126647	0.199896	0.139667	0.0838456	0.0936061	0.0822989	0.105547	0.149498	0.0497913	0.151175	0.0873641	0.16236	0.192359	0.131359	0.185539	0.369272
cg03431064	TUBB2C	9	139255387	0.0331731	0.0539412	0.0378196	0.0296423	0.0392056	0.0262722	0.05026	0.039099	0.031985	0.0382291		0.0393083	0.0259018	0.0387283	0.0368575	0.0379884	0.0315434	0.02455	0.0215497	0.0345436	0.0262638		0.0712884	0.0939171	0.0566905	0.0804758	0.0765055	0.0850444	0.0789735	0.0642496	0.0683886	0.0820736	0.0766129	0.0619528	0.0732748	0.0523717	0.0879483	0.0779491	0.0753241	0.0817751	0.0708354	0.0663858	0.0882807	0.0672117	0.0831055	0.0706305
cg03549571	DHH	12	47774465	0.0217391	0.0456338	0.032762	0.0204707	0.023783	0.0207022	0.0319613	0.0232493	0.0219306	0.0259811		0.0441983	0.0306576	0.0210608	0.026581	0.0206663	0.0165072	0.0218639	0.0155002	0.0241326	0.0152406		0.104632	0.100711	0.19814	0.142772	0.0900599	0.163908	0.115678	0.0893252	0.0857463	0.0696042	0.185372	0.140349	0.125463	0.0928584	0.0813554	0.110956	0.105668	0.134177	0.109037	0.123131	0.135347	0.147647	0.16385	0.154064
cg03556497	SLC32A1	20	36786206	0.0657157	0.0697108	0.0841402	0.084489	0.076343	0.076464	0.109637	0.104073	0.0796661	0.103769		0.0849275	0.0813284	0.0764486	0.0812431	0.0854701	0.0788652	0.0658399	0.0490232	0.125541	0.0739952		0.125479	0.151179	0.120557	0.157203	0.116685	0.130798	0.144257	0.152308	0.172172	0.166358	0.148511	0.139674	0.123849	0.133944	0.136283	0.156746	0.12469	0.135574	0.153732	0.111174	0.159799	0.136624	0.191701	0.198368
cg03560597	DUSP18	22	29394008	0.011554	0.0077127	0.0111704	0.0117124	0.0123339	0.0100711	0.0108781	0.0112663	0.00771955	0.0105512		0.0133641	0.0113317	0.00892857	0.0112429	0.0114458	0.0106496	0.0119059	0.00792896	0.00931833	0.0113157		0.0771835	0.079059	0.0665947	0.119434	0.0684284	0.0693265	0.0870617	0.0548068	0.072233	0.0675497	0.0641745	0.0549284	0.0634504	0.0687484	0.0948122	0.0657013	0.0790422	0.0874449	0.0772063	0.0500194	0.102999	0.0825943	0.0922258	0.076787
cg03717979	MSX1	4	4913085	0.0371872	0.0519183	0.0584506	0.0432035	0.0651941	0.056222	0.0569294	0.0568459	0.0600885	0.0548819		0.0518588	0.0495915	0.0505307	0.0422075	0.0941693	0.0490786	0.0414125	0.0298877	0.0574967	0.0455057		0.181526	0.16019	0.464283	0.309876	0.508029	0.284519	0.322279	0.334357	0.203529	0.386679	0.413419	0.207795	0.396843	0.105523	0.180629	0.243561	0.220218	0.313981	0.342726	0.389733	0.296968	0.41113	0.503258	0.436809
cg03805684	C11orf10	11	61317795	0.666418	0.622036	0.650474	0.610929	0.542022	0.655725	0.617607	0.664463	0.613802	0.598237		0.620833	0.725933	0.677076	0.613623	0.675693	0.66282	0.686063	0.631848	0.677411	0.656513		0.235104	0.2773	0.274868	0.269637	0.206988	0.289689	0.239853	0.239433	0.252703	0.266368	0.280629	0.249403	0.256493	0.286076	0.190114	0.220735	0.248077	0.210099	0.230993	0.186259	0.232459	0.202131	0.238456	0.194206
cg03811478	SOX14	3	138966386	0.179325	0.267767	0.206824	0.163898	0.181062	0.205501	0.23005	0.169693	0.177842	0.163148		0.23411	0.168738	0.186352	0.178717	0.198058	0.15373	0.140625	0.128019	0.207591	0.107561		0.430048	0.326662	0.436821	0.35652	0.322445	0.397254	0.533462	0.532938	0.372933	0.505679	0.505965	0.419937	0.456925	0.415475	0.425406	0.559449	0.317967	0.421214	0.50042	0.484247	0.483786	0.437407	0.509058	0.429042
cg03943081	TCERG1L	10	133000636	0.0646836	0.182931	0.0885417	0.0674035	0.063205	0.0922936	0.182502	0.0825522	0.0804173	0.0818299		0.0833333	0.101728	0.0757982	0.0793691	0.0608964	0.0975046	0.0806759	0.0646075	0.122514	0.0625225		0.0599851	0.0549261	0.046699	0.0795244	0.0476191	0.0888506	0.0756898	0.0758909	0.0502912	0.0643768	0.0741129	0.0652387	0.0695182	0.0618633	0.0801825	0.0501994	0.0638512	0.0555556	0.0715194	0.0538385	0.0841817	0.0966014	0.0686255	0.0474622
cg03962522	SLC5A1	22	30769254	0.634021	0.504577	0.422329	0.571429	0.609863	0.70438	0.573764	0.305367	0.771093	0.556242		0.323905	0.696406	0.41779	0.273721	0.638363	0.419411	0.706476	0.639529	0.574526	0.0632404		0.715769	0.593206	0.693945	0.724011	0.56396	0.713727	0.682478	0.609162	0.707054	0.629358	0.713076	0.662914	0.737172	0.62092	0.631315	0.670954	0.723413	0.683821	0.723944	0.630629	0.59176	0.602457	0.722236	0.73254
cg03977782	SIDT1	3	114734370	0.0203069	0.0206592	0.0202778	0.0200191	0.0114777	0.0113489	0.0210343	0.0173661	0.0160534	0.0127157		0.033482	0.020908	0.022217	0.0204382	0.0168535	0.0174528	0.0232673	0.012789	0.0200495	0.0156307		0.105247	0.0800078	0.142025	0.111672	0.177623	0.304763	0.068206	0.176842	0.0773992	0.155341	0.264075	0.0785157	0.0980036	0.084619	0.0706359	0.0707465	0.0874755	0.0847306	0.0869828	0.0672486	0.116277	0.210687	0.100874	0.127721
cg04005707	FLJ21511	4	48683078	0.0495283	0.119316	0.0784133	0.0627175	0.0571649	0.099755	0.0918854	0.0616781	0.0596904	0.065408		0.0908087	0.0686954	0.113034	0.106747	0.0569468	0.0518849	0.049484	0.0659184	0.0885891	0.0628776		0.509014	0.334987	0.556169	0.206401	0.347181	0.468469	0.400658	0.523086	0.578961	0.558565	0.294144	0.440559	0.538304	0.360047	0.257636	0.471346	0.336921	0.433101	0.538063	0.519023	0.433575	0.468802	0.539347	0.478575
cg04008901	CACNA2D1	7	81910715	0.0309794	0.0880172	0.0434741	0.0573086	0.0355375	0.104703	0.150169	0.0456626	0.0262593	0.0882568		0.0702424	0.0362123	0.0687574	0.0522232	0.0329309	0.0297434	0.0381986	0.0408002	0.0678228	0.0399028		0.0636612	0.110555	0.0817388	0.0546525	0.0761207	0.115714	0.0888076	0.107007	0.0564897	0.105271	0.10409	0.0822725	0.093027	0.112028	0.0913403	0.0610354	0.0828349	0.0660925	0.0743916	0.0447761	0.0702026	0.0703693	0.148908	0.0565089
cg04080057	CACNG6	19	59186995	0.348749	0.325431	0.311198	0.264844	0.274475	0.357929	0.308091	0.234491	0.403202	0.349705		0.295628	0.309051	0.36709	0.213154	0.28107	0.267362	0.276273	0.269399	0.292739	0.171173		0.485877	0.46667	0.464018	0.446929	0.434965	0.392739	0.460294	0.508655	0.43336	0.434426	0.434163	0.360968	0.465901	0.460971	0.479642	0.431745	0.375943	0.469865	0.479849	0.486304	0.507583	0.433761	0.459329	0.444606
cg04107037	ATOH1	4	94969228	0.074275	0.0967361	0.0765301	0.0749342	0.0763263	0.0721848	0.0807365	0.0624291	0.0669172	0.0751592		0.0630133	0.0773026	0.148424	0.0690711	0.0614287	0.0596412	0.0670133	0.0616415	0.127313	0.0632983		0.138497	0.146703	0.134154	0.117536	0.110107	0.162064	0.083803	0.212939	0.135735	0.445832	0.196879	0.11066	0.215553	0.128295	0.117569	0.0768226	0.0829812	0.0737224	0.243661	0.145717	0.118722	0.21371	0.129135	0.130462
cg04283938	SEPT3	22	40703244	0.0698395	0.119505	0.0622281	0.101317	0.06875	0.0992334	0.119305	0.0755524	0.0560128	0.0710818		0.0671141	0.0966229	0.0637479	0.0454192	0.0622638	0.0958661	0.129313	0.0860372	0.0641517	0.0657343		0.175816	0.221102	0.212205	0.145505	0.194585	0.233065	0.232374	0.230411	0.187635	0.247784	0.240482	0.17367	0.223745	0.167525	0.234355	0.20602	0.188082	0.204257	0.206335	0.188583	0.199251	0.210095	0.196039	0.166259
cg04324308	COL4A3	2	227736985	0.0328027	0.0540127	0.0252925	0.0247366	0.019428	0.0260584	0.0338103	0.0151539	0.0144997	0.0162158		0.0287748	0.0341014	0.0346859	0.0257041	0.026565	0.0251897	0.0182418	0.0166922	0.0449178	0.0175758		0.0786598	0.102944	0.081281	0.105156	0.169534	0.204559	0.1	0.115053	0.0999187	0.32286	0.0927177	0.068209	0.132934	0.161404	0.116956	0.130659	0.12641	0.153365	0.156138	0.266203	0.153308	0.143553	0.171563	0.077003
cg04369341	C20orf100	20	41978436	0.14188	0.273112	0.157636	0.141676	0.155617	0.148942	0.155184	0.164634	0.136131	0.112218		0.149737	0.168193	0.211694	0.0831551	0.159789	0.11029	0.0914344	0.0860175	0.135948	0.0999006		0.159912	0.17109	0.151376	0.138452	0.0936994	0.144099	0.161297	0.115786	0.137494	0.246296	0.137697	0.15694	0.222739	0.160142	0.201788	0.170206	0.136625	0.149119	0.203082	0.0868055	0.118151	0.163441	0.166683	0.140218
cg04434339	ST6GAL2	2	106869979	0.0253038	0.0601273	0.0302294	0.0306492	0.0168469	0.0319193	0.0693251	0.0369048	0.0172952	0.0732704		0.0276439	0.0367052	0.0408961	0.0394699	0.0271208	0.0250086	0.0241945	0.0197844	0.0453177	0.0209099		0.0577862	0.0568619	0.066197	0.0761945	0.0475009	0.111067	0.0637584	0.102636	0.0883389	0.103464	0.0493393	0.0351069	0.0579171	0.0685111	0.0562451	0.0642257	0.0799225	0.0471913	0.0615725	0.117804	0.0894388	0.0679712	0.0969939	0.11337
cg04490714	SLC6A2	16	54248065	0.0516988	0.0747193	0.0421794	0.0592056	0.0584516	0.0967237	0.0931505	0.0383742	0.0484049	0.0954265		0.0750728	0.0281443	0.0973863	0.0607671	0.0363081	0.0405485	0.0368854	0.0430627	0.0777476	0.034491		0.076841	0.133158	0.216575	0.055659	0.051744	0.259911	0.0668713	0.195426	0.0711056	0.134499	0.0955829	0.0759374	0.13238	0.114572	0.0527403	0.0461708	0.0780219	0.0480126	0.157519	0.168249	0.160884	0.242261	0.0785171	0.115425
cg04536575	C14orf50	14	64086555	0.0340562	0.0442781	0.0648408	0.0497342	0.0559766	0.0526187	0.0542429	0.0575289	0.051617	0.0501913		0.0485723	0.0533575	0.0508554	0.0658385	0.0513955	0.0449245	0.0375807	0.0544155	0.0499005	0.0457478		0.182365	0.148878	0.145744	0.164332	0.15155	0.157794	0.222291	0.157603	0.161362	0.165798	0.110176	0.162928	0.164763	0.17893	0.168221	0.116436	0.151191	0.13606	0.134568	0.104234	0.166606	0.14721	0.136432	0.126709
cg04557383	MT1H	16	55261069	0.0284393	0.0537603	0.047473	0.0492864	0.0344144	0.0599826	0.062297	0.0319887	0.028204	0.0300665		0.0739663	0.0328765	0.0350555	0.0515654	0.0422427	0.0334388	0.0329403	0.0402699	0.0455757	0.0427358		0.0535904	0.0635286	0.0712718	0.0877257	0.0536611	0.123169	0.0590958	0.0693229	0.0466492	0.0926551	0.0509093	0.0616004	0.0564982	0.0934919	0.0681508	0.0444211	0.0663553	0.0607993	0.0559394	0.0560651	0.088807	0.0740741	0.118766	0.201029
cg04564030	CDH7	18	61568372	0.0424361	0.0691294	0.0540119	0.0715697	0.060372	0.0623506	0.0846487	0.0727853	0.0562067	0.0551399		0.0937394	0.0609817	0.0636276	0.0644769	0.0483203	0.0859895	0.0522916	0.0411466	0.0608316	0.0515054		0.1889	0.16364	0.178151	0.260834	0.198485	0.220895	0.2836	0.151179	0.21744	0.227007	0.138055	0.137255	0.114626	0.145405	0.188857	0.168802	0.206139	0.192465	0.116696	0.119733	0.202539	0.179066	0.193074	0.162471
cg04603031	CHRNA3	15	76700211	0.0304183	0.0646519	0.0472559	0.0937667	0.0511945	0.0291457	0.0659329	0.0484708	0.0473029	0.174582		0.0509376	0.0402307	0.0517884	0.0451092	0.0352794	0.0848072	0.0667051	0.0267437	0.0988801	0.0351232		0.0733742	0.0638938	0.10713	0.197771	0.0739945	0.23472	0.0461321	0.233643	0.117432	0.346685	0.106248	0.125258	0.29659	0.32023	0.0634802	0.173023	0.0947594	0.159742	0.303928	0.162094	0.122657	0.105983	0.31812	0.07177
cg04623837	HCG9	6	30051393	0.0301853	0.0412785	0.029308	0.0333656	0.048583	0.0417839	0.039317	0.0243284	0.0255583	0.0275258		0.0620985	0.0726668	0.040583	0.0533609	0.0250661	0.0176289	0.0222358	0.0202175	0.0382226	0.0327424		0.139259	0.154473	0.184956	0.208065	0.124937	0.192399	0.159508	0.191239	0.1378	0.2179	0.174695	0.220735	0.214112	0.139852	0.143671	0.234395	0.0958074	0.291309	0.255342	0.21502	0.367159	0.237929	0.224606	0.233212
cg04628008	ZBTB16	11	113436210	0.0186916	0.014813	0.0258382	0.0168342	0.0205011	0.0198149	0.0161694	0.0253426	0.0293762	0.0166632		0.0358433	0.0438176	0.0181063	0.0184935	0.0194232	0.027423	0.0184511	0.0227998	0.0209533	0.014889		0.110785	0.0815142	0.1548	0.120773	0.0770716	0.147617	0.116153	0.0957591	0.110846	0.100315	0.101214	0.126889	0.147168	0.0860425	0.122123	0.132155	0.0986198	0.164327	0.176858	0.123411	0.205078	0.177653	0.139107	0.112893
cg04739570	PODXL2	3	128831301	0.248439	0.213495	0.194389	0.340872	0.223417	0.188249	0.27072	0.208157	0.142939	0.229903		0.139175	0.146759	0.180966	0.308739	0.161364	0.211873	0.327672	0.0639309	0.181528	0.06092		0.213153	0.182909	0.274414	0.247588	0.273628	0.399723	0.305845	0.308935	0.249018	0.343167	0.266948	0.2222	0.3054	0.204116	0.214783	0.187317	0.22419	0.188088	0.288081	0.283042	0.338393	0.470081	0.356996	0.286083
cg04774694	DPEP2	16	66590771	0.603352	0.698195	0.62187	0.720159	0.676924	0.696041	0.712624	0.769651	0.748582	0.804223		0.709114	0.719989	0.675003	0.784513	0.718203	0.73802	0.82337	0.838336	0.763679	0.784243		0.786069	0.749287	0.807565	0.788956	0.755457	0.757978	0.798164	0.775246	0.810228	0.787173	0.807237	0.827448	0.800387	0.78051	0.781066	0.742887	0.768427	0.828241	0.81478	0.743332	0.737272	0.727061	0.75261	0.780029
cg04862249	ZFP3	17	4922968	0.0196319	0.017004	0.0200713	0.0177634	0.0142164	0.0253596	0.0307811	0.0146467	0.0235294	0.0159004		0.0265427	0.0192555	0.0168262	0.0221294	0.0167371	0.017395	0.0115936	0.0240623	0.0237001	0.0195139		0.224044	0.227499	0.206605	0.167697	0.265758	0.209533	0.20706	0.282854	0.227549	0.238675	0.247936	0.170429	0.235324	0.218689	0.258788	0.211431	0.211056	0.236105	0.228948	0.23232	0.306756	0.36321	0.191401	0.178939
cg04915566	RUNX1	21	35343342	0.0276069	0.0317243	0.0354821	0.0303628	0.0281669	0.0340565	0.0364963	0.0347116	0.025798	0.027517		0.0514157	0.0429089	0.0246747	0.0294455	0.0256564	0.0406519	0.0251341	0.0240416	0.0388252	0.0280508		0.695134	0.694869	0.646854	0.612894	0.696674	0.694299	0.678775	0.704649	0.718267	0.730507	0.638969	0.695426	0.659537	0.670797	0.657473	0.747329	0.679473	0.74227	0.654045	0.633846	0.639508	0.67704	0.606815	0.720815
cg04970117	SLC6A20	3	45813041	0.0212839	0.0117554	0.0101567	0.0134145	0.0158295	0.0154806	0.0175886	0.0137576	0.0121652	0.0212297		0.0208547	0.0310772	0.0158994	0.015544	0.0156778	0.0101499	0.00875684	0.0250795	0.0223896	0.0167767		0.0547292	0.0514547	0.0641566	0.074763	0.0419723	0.156381	0.0585986	0.0600243	0.0586025	0.0976909	0.0570611	0.0411933	0.104903	0.138752	0.0634515	0.0502627	0.0556871	0.0511038	0.0963551	0.08798	0.0556013	0.115782	0.0834213	0.10559
cg05059825	TTC9C	11	62252526	0.0137639	0.0198591	0.016682	0.0128645	0.0122525	0.0130495	0.0133975	0.0126455	0.0128748	0.012783		0.0158969	0.0177726	0.0118684	0.021992	0.0145274	0.0167247	0.0158497	0.0126557	0.0146087	0.0154865		0.126921	0.104442	0.0676375	0.13098	0.107892	0.115863	0.0930055	0.0710388	0.0847722	0.074218	0.0721817	0.0677451	0.0925771	0.0871606	0.125499	0.0731113	0.0845752	0.0997831	0.0718349	0.0966413	0.134207	0.122266	0.13924	0.103545
cg05251000	FREQ	9	131975485	0.106619	0.146262	0.223538	0.203816	0.10577	0.232083	0.149693	0.236235	0.213673	0.214981		0.241316	0.0902895	0.122285	0.0906418	0.109087	0.196878	0.0983955	0.0651925	0.0868609	0.080646		0.232929	0.286975	0.358331	0.231887	0.167978	0.288231	0.270034	0.281856	0.231829	0.247945	0.260176	0.344488	0.219219	0.201402	0.275923	0.345733	0.19966	0.344303	0.184603	0.315473	0.374022	0.31127	0.328483	0.349333
cg05373457	KCNS2	8	99509124	0.138546	0.297876	0.192941	0.225705	0.162139	0.231818	0.293378	0.216849	0.171751	0.199181		0.226329	0.215229	0.219271	0.13993	0.18376	0.252555	0.10741	0.185434	0.224348	0.110223		0.170789	0.250945	0.223736	0.250632	0.263095	0.298887	0.217045	0.200923	0.220404	0.249148	0.199208	0.186246	0.366308	0.25902	0.233485	0.154982	0.185224	0.173399	0.329462	0.350882	0.359462	0.271974	0.241939	0.308649
cg05399360	MICB	6	31573982	0.00730863	0.0093434	0.0109445	0.00906063	0.011486	0.0101586	0.0122603	0.0143514	0.0102115	0.0155214		0.015873	0.0211921	0.0110301	0.00956993	0.0119784	0.010138	0.0126271	0.00905155	0.0107296	0.010989		0.0556796	0.064224	0.0544619	0.0726814	0.0518709	0.0610512	0.0588745	0.0939178	0.0777392	0.0494511	0.0703339	0.0819034	0.0870655	0.0650158	0.0576947	0.0867785	0.0640382	0.0752519	0.0823283	0.0955543	0.0720197	0.116598	0.11217	0.0664371
cg05421688	C1orf76	1	177978482	0.0199804	0.0381339	0.0315168	0.0223178	0.0197111	0.0221232	0.0333076	0.0280773	0.0208765	0.031101		0.0329705	0.0213306	0.032047	0.0431125	0.0204133	0.0256521	0.020198	0.0170987	0.0216834	0.014972		0.0795392	0.072655	0.0744726	0.0670966	0.0617944	0.0976804	0.106469	0.095504	0.0583691	0.079956	0.0628457	0.0566456	0.0922428	0.0989619	0.0659701	0.0608797	0.0759318	0.0851714	0.083167	0.0545405	0.107919	0.0888807	0.085807	0.0659586
cg05522383	PITX2	4	111777343	0.0930485	0.116363	0.111939	0.087633	0.117127	0.127144	0.112515	0.0905442	0.0999611	0.0985638		0.0880015	0.075031	0.115863	0.083894	0.0972051	0.0804272	0.0586915	0.0814603	0.09503	0.0629831		0.132008	0.121398	0.114376	0.135485	0.0988898	0.300732	0.0957322	0.171197	0.114558	0.253255	0.101173	0.168674	0.253488	0.142403	0.23267	0.089767	0.104801	0.156615	0.299528	0.14169	0.171072	0.161765	0.1944	0.10175
cg05546038	NOL3	16	65764534	0.757309	0.766792	0.737738	0.708798	0.731942	0.772786	0.743173	0.679112	0.717029	0.754185		0.753852	0.697315	0.716702	0.701027	0.769384	0.727779	0.687407	0.759888	0.691888	0.713009		0.865462	0.852423	0.891726	0.847911	0.847729	0.857611	0.908166	0.892232	0.846546	0.899988	0.902263	0.866738	0.878395	0.871259	0.875129	0.894942	0.888282	0.900182	0.850469	0.832199	0.846637	0.870456	0.832472	0.864389
cg05589246	HOXC12	12	52634986	0.0705325	0.103392	0.0759561	0.117624	0.0893905	0.0792745	0.100728	0.08067	0.0830311	0.0959394		0.0907646	0.0561908	0.0794276	0.0739287	0.0620172	0.069299	0.0836848	0.0643149	0.110313	0.073964		0.134948	0.156475	0.170419	0.122193	0.109109	0.112195	0.108876	0.132681	0.117333	0.128357	0.129199	0.0999707	0.0948012	0.0937713	0.143223	0.100517	0.143617	0.119865	0.13815	0.146088	0.162629	0.166957	0.159918	0.125806
cg05675373	KCNC4	1	110555780	0.0869723	0.100046	0.0722412	0.126937	0.0708955	0.0555519	0.0919419	0.0465889	0.0598091	0.0615737		0.097813	0.0601024	0.0772259	0.0603937	0.081415	0.0761535	0.0601927	0.0794913	0.0772224	0.0397342		0.10071	0.154931	0.169687	0.161897	0.0857579	0.291538	0.101042	0.196672	0.118259	0.375455	0.23887	0.242265	0.240516	0.15695	0.16873	0.28344	0.0955887	0.350708	0.20399	0.332362	0.240768	0.217932	0.149458	0.266056
cg05942574	CACNA1G	17	45992103	0.0708231	0.0830977	0.100242	0.135084	0.0644885	0.0723001	0.0877889	0.0654819	0.0754786	0.0758055		0.0997852	0.0717456	0.0866322	0.073152	0.0800506	0.088293	0.0742251	0.0682788	0.10841	0.0657895		0.19714	0.205423	0.267734	0.236369	0.207569	0.22994	0.215578	0.188089	0.182064	0.305762	0.189166	0.219734	0.290346	0.402301	0.290888	0.332802	0.192744	0.399554	0.24251	0.25175	0.37241	0.312292	0.262576	0.304211
cg06038133	CORO6	17	24968711	0.0581456	0.0535562	0.0738507	0.145543	0.084619	0.052988	0.0483144	0.0446668	0.0709267	0.0495625		0.0619911	0.0484462	0.0550537	0.17256	0.0355653	0.0520708	0.0444408	0.02977	0.0572652	0.0396796		0.439704	0.510335	0.631653	0.442415	0.415641	0.599477	0.600634	0.59193	0.594138	0.684766	0.570555	0.5838	0.556352	0.619982	0.533906	0.595854	0.492375	0.593335	0.576277	0.577018	0.596016	0.593295	0.555017	0.539161
cg06111454	NFATC4	14	23907676	0.0217231	0.0159279	0.0188411	0.0162531	0.0218849	0.0221066	0.0204235	0.0237883	0.0129239	0.019112		0.0275379	0.0541379	0.0151554	0.0247478	0.0142382	0.0171085	0.0153937	0.0213563	0.0195739	0.0208486		0.0740529	0.0505438	0.0543143	0.0612327	0.059456	0.0622612	0.082556	0.0611169	0.0802792	0.0673429	0.0646851	0.0593068	0.0421213	0.0650611	0.0823115	0.0451703	0.0656413	0.105375	0.0448029	0.0469731	0.10017	0.0811594	0.0941736	0.0458051
cg06206626	ASPHD2	22	25155900	0.445122	0.484372	0.424923	0.451228	0.428414	0.52817	0.469075	0.468841	0.432969	0.484094		0.423919	0.35435	0.440277	0.371693	0.407655	0.502439	0.407077	0.486957	0.337318	0.319452		0.306055	0.34458	0.381796	0.306686	0.286695	0.363203	0.314762	0.312001	0.336839	0.379109	0.414478	0.31293	0.360904	0.33948	0.316528	0.357594	0.342267	0.328022	0.413092	0.400126	0.410183	0.358503	0.302311	0.344096
cg06269753	MSC	8	72918425	0.0547884	0.0527385	0.0575782	0.0607724	0.0522883	0.0610415	0.0500753	0.0587138	0.0545276	0.0505737		0.0738359	0.0885921	0.0477511	0.0605743	0.0683051	0.0546921	0.0478257	0.0499738	0.0605513	0.0523573		0.299055	0.232929	0.333701	0.24594	0.306012	0.332428	0.474291	0.367568	0.276094	0.367408	0.336143	0.21917	0.291868	0.34356	0.202284	0.38622	0.238255	0.422514	0.254064	0.298104	0.252687	0.332798	0.417491	0.217274
cg06288351	KCNS1	20	43163311	0.489829	0.342438	0.35731	0.453275	0.4526	0.428693	0.383044	0.410887	0.429708	0.482015		0.396598	0.291235	0.413503	0.321305	0.376266	0.430435	0.407587	0.419062	0.432863	0.34128		0.255903	0.303293	0.338557	0.240912	0.224349	0.335544	0.310361	0.255309	0.297475	0.260249	0.240884	0.269238	0.254775	0.256483	0.214682	0.215173	0.23314	0.236167	0.262436	0.280477	0.312467	0.265516	0.244841	0.270703
cg06325346	VN1R2	19	58452992	0.407428	0.492063	0.353827	0.472219	0.390647	0.399655	0.385419	0.407063	0.418286	0.364022		0.337818	0.357428	0.459426	0.445408	0.513574	0.434803	0.439509	0.403072	0.622899	0.355298		0.352124	0.404115	0.334068	0.310974	0.350917	0.341953	0.306158	0.372402	0.354801	0.303464	0.348993	0.318177	0.338344	0.36285	0.326203	0.298192	0.335014	0.337986	0.386956	0.284401	0.336205	0.336287	0.308499	0.29051
cg06465021	SLC12A2	5	127446446	0.0355728	0.0459023	0.0408596	0.0439132	0.0419565	0.0287867	0.0337537	0.03527	0.0401084	0.039274		0.0398022	0.0287877	0.0279708	0.0394657	0.0408333	0.0407611	0.0312933	0.0225894	0.0472454	0.0282697		0.101653	0.120543	0.0845439	0.0910272	0.117695	0.135763	0.118216	0.0977629	0.101186	0.109144	0.119091	0.106132	0.146476	0.106961	0.120059	0.0604648	0.0998196	0.0937555	0.136	0.107015	0.101936	0.104774	0.133386	0.0971357
cg06498267	HCN1	5	45731679	0.0597876	0.161919	0.0505447	0.117168	0.0674976	0.131395	0.13589	0.0789966	0.0427739	0.0881872		0.177247	0.0502669	0.11793	0.106535	0.0408998	0.0473966	0.0401677	0.0838065	0.0891657	0.0389341		0.160257	0.205311	0.340475	0.338248	0.240648	0.429742	0.394637	0.386331	0.365494	0.268442	0.413144	0.209942	0.327892	0.388331	0.31811	0.377721	0.352745	0.429929	0.338258	0.511465	0.571264	0.442775	0.502243	0.399581
cg06539804	CPXM	20	2729489	0.00852071	0.0181841	0.016	0.018314	0.0208644	0.0233333	0.0117228	0.0182864	0.0114613	0.0160304		0.0295953	0.0175702	0.0122085	0.0129065	0.0158621	0.0134918	0.0212989	0.0136927	0.0156411	0.0177676		0.108138	0.110112	0.105082	0.161808	0.10142	0.127518	0.133609	0.130667	0.101629	0.12217	0.099112	0.0889368	0.0747327	0.105357	0.132242	0.0782978	0.121207	0.0909937	0.0818997	0.0937705	0.151759	0.118533	0.175569	0.111525
cg06646021	RAB4A	1	227473143	0.782629	0.869299	0.825107	0.827581	0.837239	0.893962	0.785154	0.808713	0.842529	0.871131		0.850149	0.763526	0.781203	0.834009	0.76371	0.812436	0.758261	0.79893	0.87092	0.852877		0.600714	0.638174	0.682782	0.597237	0.592802	0.583903	0.662356	0.619205	0.565672	0.666096	0.59211	0.579758	0.582317	0.613981	0.608908	0.645667	0.476208	0.653436	0.591726	0.683249	0.633938	0.708069	0.562142	0.59698
cg06738602	PTGER2	14	51850384	0.0868214	0.0738331	0.0395064	0.0848098	0.0718125	0.0488599	0.0644071	0.0724454	0.0581812	0.0717647		0.09269	0.0428546	0.0614537	0.0531061	0.069691	0.0367254	0.0352697	0.0410463	0.0675458	0.0211226		0.198498	0.15091	0.224668	0.173653	0.125372	0.256476	0.266128	0.287782	0.180969	0.182032	0.19773	0.115358	0.261248	0.176836	0.265941	0.284989	0.11367	0.34413	0.321867	0.312864	0.326982	0.214009	0.358351	0.299477
cg06762858	PILRA	7	99809192	0.825507	0.79722	0.753346	0.721426	0.805333	0.83459	0.819006	0.752214	0.75785	0.789715		0.763697	0.835373	0.803531	0.762696	0.838799	0.796322	0.864628	0.805504	0.853747	0.781319		0.810618	0.811602	0.832183	0.804929	0.768914	0.806355	0.766329	0.790187	0.785766	0.789185	0.815221	0.795061	0.811762	0.82131	0.7627	0.820422	0.785399	0.805344	0.825749	0.818779	0.819238	0.793762	0.806579	0.81644
cg06790275	PIAS1	15	66133723	0.0410143	0.0554749	0.0467308	0.0278613	0.0507032	0.0354141	0.0288125	0.0382135	0.0777523	0.0726893		0.0414363	0.034802	0.0540056	0.0338339	0.0487326	0.0369768	0.0543989	0.0277467	0.0432282	0.0427673		0.0506947	0.0609619	0.0538968	0.0641125	0.0971063	0.0626088	0.0465864	0.0452263	0.048857	0.0482767	0.0449449	0.0562813	0.06355	0.0397198	0.0632911	0.0374275	0.0769439	0.0359647	0.0496666	0.0514449	0.0582169	0.0973546	0.0816022	0.106847
cg06791102	ARHGAP4	X	152844794	0.478692	0.582695	0.592638	0.49458	0.466336	0.620941	0.487598	0.54293	0.552673	0.552207		0.0293914	0.0525819	0.0354223	0.0393006	0.0274707	0.0267439	0.0332076	0.0238908	0.0465628	0.0267931		0.678776	0.608742	0.743031	0.528618	0.619079	0.757922	0.707268	0.73442	0.679121	0.761961	0.728248	0.538939	0.711562	0.730682	0.526215	0.696787	0.457431	0.766961	0.716568	0.633926	0.78442	0.757906	0.608005	0.626088
cg06937608	AGC1	15	87147048	0.0505319	0.0600243	0.0574509	0.0480071	0.0577549	0.0413847	0.0716874	0.0741744	0.0778564	0.0455473		0.0691219	0.04317	0.0718813	0.0363361	0.0662345	0.0512266	0.0490315	0.03137	0.0972897	0.189433		0.208164	0.154694	0.201446	0.178876	0.107784	0.282284	0.123868	0.261433	0.200439	0.171727	0.135479	0.280181	0.236361	0.151755	0.174263	0.13881	0.175937	0.176861	0.27359	0.170398	0.214635	0.126131	0.202706	0.200414
cg06940792	MEGF10	5	126654456	0.0178953	0.036412	0.0202048	0.0190233	0.025169	0.0179056	0.0320867	0.0169569	0.0164079	0.0345679		0.0303941	0.0252063	0.029923	0.0228122	0.0171478	0.0227963	0.018215	0.0137146	0.0276504	0.013659		0.0859537	0.0807518	0.0826855	0.0728902	0.0749149	0.101402	0.0865598	0.162343	0.0732692	0.0927461	0.0712393	0.0838227	0.101755	0.110293	0.0935083	0.0638508	0.0875818	0.0909091	0.0925823	0.0701428	0.0830146	0.0869654	0.123228	0.0907773
cg06958034	AOF2	1	23218790	0.0165281	0.0177575	0.0153012	0.0183877	0.0165571	0.0122237	0.0179594	0.0185821	0.0145367	0.0156794		0.0284165	0.0192267	0.013055	0.0218783	0.0153164	0.0156419	0.0103602	0.017664	0.0169396	0.0176712		0.0745188	0.0781381	0.0581794	0.0738912	0.0593422	0.0727925	0.08394	0.0506676	0.105753	0.0682882	0.0656845	0.0548739	0.0532941	0.0614157	0.0840132	0.0596372	0.0697413	0.0838495	0.0498976	0.0506001	0.0756391	0.0810612	0.0800544	0.079276
cg06995715	FOXL1	16	85170091	0.0205288	0.0470864	0.0402629	0.0233987	0.0222376	0.0290532	0.0517954	0.0269319	0.0229885	0.0299845		0.0425591	0.0617514	0.031532	0.0275218	0.0216262	0.0195559	0.0223097	0.0241834	0.0312856	0.0375321		0.170217	0.244584	0.398976	0.221486	0.24872	0.24763	0.133781	0.443704	0.189861	0.338867	0.223648	0.252472	0.392849	0.216076	0.213109	0.345387	0.0851467	0.346638	0.3743	0.362808	0.361879	0.175508	0.362369	0.272564
cg07057831	EPIM	12	129888995	0.341592	0.339052	0.391214	0.38471	0.377246	0.287675	0.36015	0.398429	0.397338	0.392598		0.337591	0.280838	0.322438	0.352151	0.336169	0.324606	0.312621	0.270854	0.443225	0.184575		0.180545	0.202142	0.215674	0.159694	0.250606	0.196697	0.269555	0.250049	0.178092	0.261097	0.251361	0.232501	0.208003	0.230299	0.201631	0.215657	0.17948	0.259323	0.224567	0.221925	0.245983	0.304388	0.217881	0.225689
cg07200280	RAFTLIN	3	16529623	0.028094	0.019773	0.0177769	0.0272549	0.0269961	0.0228559	0.0179475	0.0183977	0.0236039	0.0228895		0.0377672	0.038441	0.0205298	0.0181656	0.0221957	0.0270815	0.0216819	0.0286083	0.0221916	0.0189915		0.198416	0.192742	0.244532	0.217458	0.206542	0.284049	0.159322	0.162343	0.178286	0.293898	0.181715	0.225109	0.191029	0.184957	0.223835	0.301081	0.164748	0.259833	0.158107	0.29292	0.359923	0.262443	0.326659	0.245251
cg07214572	LHX9	1	196147976	0.0166023	0.0177862	0.0132223	0.0245484	0.0145377	0.0170897	0.0293153	0.0133804	0.0177993	0.0113242		0.0205364	0.0266854	0.0219427	0.0216414	0.0135135	0.017695	0.0164554	0.0185931	0.0176367	0.0133515		0.0631388	0.067293	0.0689732	0.0927858	0.0560858	0.0861688	0.075427	0.0877052	0.0623457	0.067004	0.0959665	0.0622168	0.0503778	0.0630384	0.0703263	0.0665259	0.053014	0.0785334	0.0498415	0.0809557	0.0787444	0.089367	0.111376	0.085885
cg07241568	ABO	9	135140644	0.023123	0.0596425	0.0258002	0.0282562	0.0295274	0.0580556	0.0307897	0.0175898	0.0256222	0.0341973		0.0549401	0.0416844	0.0325648	0.0471863	0.0201496	0.0364035	0.0233293	0.0280735	0.0261445	0.0287502		0.149407	0.181617	0.242352	0.152049	0.14824	0.358237	0.1341	0.248224	0.162334	0.42101	0.236842	0.176202	0.215681	0.333784	0.164346	0.119651	0.15135	0.138457	0.239734	0.353735	0.323985	0.229211	0.204958	0.251152
cg07314337	ARL6IP6	2	153282670	0.00768214	0.0135135	0.0114275	0.0121812	0.00578346	0.0110371	0.0128552	0.0123074	0.00923865	0.00981847		0.0137829	0.0135075	0.011373	0.0114721	0.0100699	0.0128419	0.0114989	0.010708	0.0128343	0.0102297		0.0672764	0.0692588	0.0641612	0.0937536	0.0494637	0.0686842	0.0807168	0.0512721	0.0607582	0.0427272	0.0493613	0.0608974	0.0623349	0.0633509	0.0749444	0.0520623	0.0579421	0.0593764	0.0409545	0.0407818	0.0769231	0.0765829	0.0715321	0.0677416
cg07498879	OSM	22	28993041	0.0478897	0.0499587	0.0737225	0.0529604	0.0560656	0.0450843	0.0564052	0.0571892	0.0419657	0.0499199		0.0702042	0.0378091	0.0541896	0.0433513	0.0439862	0.0401614	0.026828	0.0356713	0.044035	0.0276716		0.863041	0.861552	0.886307	0.823111	0.772875	0.790605	0.891879	0.841931	0.812226	0.810371	0.834119	0.857689	0.832615	0.819983	0.899482	0.865412	0.883139	0.88177	0.836025	0.859428	0.862248	0.867577	0.887767	0.873427
cg07612655	PTGIS	20	47618924	0.172499	0.200743	0.289052	0.304382	0.218825	0.197108	0.297063	0.310249	0.233988	0.346463		0.369851	0.229934	0.283031	0.309414	0.216186	0.311472	0.271496	0.284524	0.436669	0.106821		0.49974	0.440588	0.512483	0.396067	0.39072	0.466876	0.432024	0.432957	0.432243	0.453772	0.538139	0.333458	0.44109	0.38694	0.42652	0.441056	0.372545	0.505079	0.415152	0.372078	0.450858	0.389811	0.356162	0.449477
cg07690018	CPNE7	16	88169993	0.0680898	0.0564706	0.0739171	0.0441406	0.0365985	0.0586158	0.0385836	0.0361362	0.0526878	0.0479588		0.0886327	0.306353	0.0439081	0.0764192	0.0446009	0.0586491	0.0434235	0.0704501	0.056338	0.0720824		0.106305	0.124981	0.136339	0.124753	0.0902472	0.235625	0.127045	0.334395	0.118819	0.305234	0.111195	0.11726	0.120608	0.186006	0.18507	0.243503	0.117684	0.262635	0.131383	0.271745	0.128251	0.226683	0.135181	0.177952
cg07717632	FLJ20245	9	139292452	0.028412	0.063133	0.0402791	0.0307692	0.0364568	0.0511578	0.0375845	0.0331846	0.0288426	0.0387097		0.0531674	0.0787445	0.0408961	0.0404984	0.0359754	0.0386141	0.0395543	0.0520314	0.0406242	0.035		0.424645	0.301611	0.401063	0.334138	0.267043	0.40521	0.35614	0.412256	0.385694	0.54692	0.472324	0.358515	0.303987	0.33127	0.320698	0.435548	0.276023	0.490545	0.327839	0.458366	0.352509	0.405738	0.415929	0.384261
cg07758904	TSCOT	9	114692645	0.0401929	0.0738025	0.0365535	0.0569449	0.0235919	0.0685634	0.0678548	0.0806331	0.0764273	0.0383487		0.0668774	0.199438	0.262904	0.0445809	0.0466534	0.0251542	0.254347	0.0236923	0.0923459	0.0190281		0.457932	0.538467	0.451891	0.512144	0.532112	0.524043	0.530094	0.643233	0.474625	0.554724	0.532856	0.55058	0.538203	0.54255	0.533223	0.564922	0.52621	0.544617	0.513768	0.5626	0.621866	0.613551	0.534281	0.525185
cg07766612	SLC30A2	1	26245474	0.026056	0.0377919	0.0329964	0.0281102	0.021924	0.0350545	0.0360192	0.0411674	0.0239213	0.0497167		0.0340966	0.0289422	0.0412689	0.0265966	0.0400359	0.0369975	0.0210066	0.0236078	0.0572016	0.0613664		0.0770177	0.0671948	0.0578855	0.0608615	0.0652891	0.0974388	0.0711729	0.0525371	0.073957	0.0465292	0.0762924	0.0663728	0.0408851	0.0606218	0.0749345	0.0467088	0.062386	0.0625909	0.057592	0.0392807	0.096221	0.174632	0.0870082	0.0682469
cg07785936	GPR39	2	132891105	0.851186	0.79257	0.849995	0.76692	0.834374	0.849322	0.776801	0.78961	0.835686	0.808824		0.79682	0.843519	0.78565	0.838852	0.812863	0.818329	0.842043	0.788868	0.714475	0.773952		0.647189	0.59384	0.680364	0.653917	0.712532	0.724964	0.674111	0.728901	0.642839	0.770496	0.679304	0.687814	0.730565	0.694299	0.581891	0.682664	0.607243	0.683582	0.707457	0.719409	0.758986	0.699679	0.699102	0.678213
cg07832674	IL17RE	3	9918884	0.0538122	0.0598404	0.0440323	0.0609946	0.0481697	0.0382872	0.0521345	0.0460216	0.0475905	0.0515016		0.0617486	0.0671871	0.0690361	0.0533407	0.0544036	0.0764011	0.0443504	0.0324756	0.0345345	0.0279486		0.768248	0.796747	0.7687	0.703185	0.71365	0.70943	0.780372	0.770952	0.722578	0.721375	0.735272	0.743865	0.764892	0.70872	0.811409	0.802616	0.764891	0.767141	0.769772	0.711478	0.71998	0.775936	0.757769	0.757233
cg08045570	FOXF2	6	1335501	0.0104357	0.0273102	0.0119796	0.0117088	0.011755	0.0130435	0.0263212	0.0113827	0.00740844	0.0504086		0.0175706	0.0230474	0.0255518	0.0150973	0.00856531	0.0152421	0.0184737	0.00954536	0.040411	0.00913495		0.0563154	0.0618565	0.0602115	0.0849196	0.0449466	0.0684656	0.0714522	0.124191	0.0475198	0.0932543	0.0385247	0.0428408	0.0646855	0.0630731	0.0612336	0.040617	0.0450433	0.0534002	0.0846198	0.0696131	0.0818916	0.0660645	0.132216	0.0683835
cg08062469	SPAG5	17	23950754	0.0233068	0.0251043	0.0265648	0.0274706	0.0218211	0.0115415	0.0310266	0.0299669	0.0236482	0.0261761		0.0384778	0.0321998	0.0300504	0.0302632	0.0192483	0.0169811	0.0186485	0.014428	0.0224215	0.0150555		0.0848852	0.0934831	0.0955076	0.11067	0.0860858	0.0848116	0.122073	0.114129	0.0802197	0.0804469	0.064648	0.069383	0.064755	0.0579698	0.082956	0.118937	0.0855829	0.127458	0.0658677	0.111907	0.12074	0.119104	0.121173	0.0863808
cg08118311	SALL3	18	74841389	0.0176319	0.0780914	0.0218177	0.0187471	0.0284314	0.0480174	0.0789444	0.0367584	0.0245583	0.0641413		0.0494271	0.041447	0.0620095	0.0400879	0.0282756	0.0397576	0.0375636	0.0374912	0.0373868	0.0373605		0.102984	0.131132	0.0687354	0.0756034	0.0658118	0.280402	0.0906332	0.389928	0.111939	0.228451	0.105894	0.0692226	0.120176	0.360581	0.0769789	0.0821507	0.096641	0.0907912	0.0798914	0.173701	0.117543	0.242241	0.118837	0.0864002
cg08186124	LZTFL1	3	45858680	0.0291803	0.0388283	0.0283	0.0302733	0.0309982	0.0281822	0.0363563	0.0347228	0.0272804	0.0266461		0.0298244	0.0266079	0.0317303	0.0307757	0.0237877	0.0333944	0.0268995	0.0384557	0.0316494	0.0245928		0.103039	0.0956652	0.133395	0.12235	0.0800569	0.113348	0.0909884	0.104036	0.145174	0.316167	0.0888024	0.0855442	0.140763	0.0969697	0.0760117	0.114603	0.0644143	0.126224	0.13403	0.0668832	0.120472	0.148057	0.104913	0.103112
cg08263357	PLAGL1	6	144371473	0.755736	0.794111	0.742911	0.803987	0.765741	0.840414	0.765312	0.791211	0.751743	0.754287		0.770797	0.596758	0.775732	0.797724	0.680486	0.796581	0.810469	0.864651	0.791088	0.784447		0.74915	0.842893	0.779064	0.749598	0.757993	0.778405	0.742405	0.7533	0.808799	0.749383	0.770949	0.74181	0.7567	0.838921	0.75869	0.757156	0.81453	0.782525	0.78804	0.789496	0.799636	0.812925	0.796304	0.795126
cg08331960	SLC9A3R2	16	2016598	0.53613	0.615365	0.513075	0.579612	0.527053	0.671035	0.58342	0.577211	0.498916	0.586107		0.53693	0.620621	0.571975	0.440463	0.633273	0.611789	0.629957	0.522066	0.526531	0.465309		0.602377	0.538259	0.556402	0.528205	0.540931	0.527465	0.667581	0.581727	0.548169	0.599048	0.637063	0.576054	0.542382	0.563496	0.604484	0.58379	0.546906	0.609731	0.564614	0.547499	0.603681	0.568108	0.613851	0.575998
cg08369065	GATA4	8	11600092	0.0585541	0.0872201	0.0734214	0.0545186	0.0597458	0.0897465	0.119161	0.0630337	0.0682517	0.0612357		0.0704889	0.0536798	0.0857813	0.0634258	0.060626	0.0347617	0.042209	0.04	0.061256	0.0459272		0.151629	0.152779	0.353304	0.170672	0.271903	0.259746	0.309186	0.212121	0.193013	0.209139	0.241312	0.193683	0.340226	0.202449	0.219497	0.198721	0.109601	0.220173	0.315226	0.26341	0.233809	0.306036	0.206892	0.35988
cg08432727	SOX11	2	5749173	0.071716	0.185972	0.0825533	0.104618	0.0873037	0.156985	0.157551	0.0948289	0.0593238	0.100341		0.133678	0.0767436	0.140669	0.137789	0.0758753	0.0516658	0.051956	0.0859692	0.0991754	0.0655869		0.0610281	0.0752215	0.148286	0.0502579	0.0477741	0.126265	0.0511906	0.169161	0.0769001	0.0605866	0.11824	0.0300467	0.132942	0.0852172	0.0433802	0.0645293	0.0422797	0.0583653	0.151537	0.155819	0.0591911	0.202338	0.194137	0.05585
cg08434234	DGKI	7	137181713	0.0192922	0.036174	0.0200858	0.0307006	0.0277908	0.0284216	0.0296936	0.0212981	0.0204755	0.0420168		0.0236748	0.0391229	0.0255378	0.0378109	0.0233297	0.0232675	0.0286073	0.0204923	0.0288714	0.0273432		0.11484	0.0803895	0.0629235	0.110694	0.0925027	0.123841	0.0989995	0.15473	0.0609381	0.126914	0.0922614	0.105726	0.121531	0.12145	0.107839	0.0717348	0.0802172	0.0939933	0.0798306	0.153057	0.150158	0.166202	0.169786	0.198908
cg08453096	ABCG5	2	43919397	0.90149	0.884398	0.874939	0.937617	0.899829	0.888282	0.874284	0.909814	0.929748	0.920579		0.838002	0.827334	0.90471	0.909712	0.917444	0.912429	0.88459	0.875784	0.903157	0.900651		0.748127	0.726302	0.720388	0.734048	0.699509	0.730408	0.643037	0.656639	0.746029	0.737873	0.785222	0.722662	0.713374	0.737878	0.680699	0.65994	0.731104	0.709402	0.73983	0.681769	0.647945	0.646667	0.664096	0.679439
cg08570521	TLL1	4	167013921	0.0395018	0.068128	0.0403565	0.0358524	0.0342502	0.0436128	0.0631042	0.0401364	0.0345139	0.0468678		0.046043	0.0329936	0.0512218	0.045439	0.0370027	0.0426801	0.0551801	0.0367522	0.0471005	0.0220409		0.10869	0.0836356	0.081205	0.126586	0.0715625	0.242409	0.128081	0.200452	0.088207	0.388085	0.159205	0.0837055	0.142125	0.216533	0.11771	0.0673319	0.0882786	0.114355	0.134313	0.11156	0.11977	0.102787	0.153285	0.0951863
cg08572611	ACTL6B	7	100091850	0.0247709	0.131372	0.0610315	0.0506306	0.0583585	0.0865301	0.196002	0.056516	0.0431253	0.0901445		0.118172	0.05822	0.0905241	0.0639838	0.0493664	0.0403883	0.0334526	0.0381386	0.0666432	0.0536775		0.080735	0.077582	0.0712509	0.0826908	0.0886473	0.106099	0.0802237	0.0741603	0.0663402	0.0729385	0.059877	0.0518944	0.0756668	0.0667399	0.111613	0.059605	0.0774721	0.098604	0.0811579	0.0764624	0.0764621	0.0860367	0.0900428	0.0887529
cg08573687	TH	11	2149617	0.979125	0.966068	0.966351	0.969045	0.961592	0.959672	0.972894	0.96842	0.967074	0.96636		0.947163	0.943979	0.965033	0.967059	0.951717	0.976922	0.957599	0.967846	0.971886	0.957485		0.798072	0.658217	0.794	0.865923	0.574029	0.854931	0.842457	0.84043	0.726939	0.777508	0.831116	0.609046	0.779913	0.90954	0.699011	0.758083	0.740404	0.785503	0.809293	0.780395	0.73974	0.690113	0.624657	0.729856
cg08725962	ARL10	5	175725099	0.00783962	0.0112561	0.0101548	0.00617502	0.00661326	0.00673566	0.00757341	0.00817816	0.00698285	0.0082043		0.010792	0.0120586	0.00842068	0.00780005	0.00895017	0.00782316	0.010505	0.0050025	0.00604263	0.00640454		0.229648	0.0441352	0.0393538	0.187791	0.049403	0.122026	0.0582916	0.0338175	0.0415094	0.0358655	0.0456558	0.0349369	0.0386629	0.0447892	0.0613347	0.037743	0.0435718	0.061314	0.0265966	0.311864	0.0837276	0.0568155	0.0506627	0.0502233
cg08806153	HOXD11	2	176680207	0.0220275	0.0437265	0.0198202	0.0267444	0.0157546	0.0313954	0.0261522	0.0244072	0.0281871	0.0291426		0.0334895	0.0198996	0.0348497	0.0394453	0.0287179	0.0150624	0.0104432	0.0193786	0.0220123	0.0171198		0.069664	0.0488619	0.0542848	0.0648862	0.0527226	0.0892136	0.0523698	0.0865172	0.0469976	0.0361374	0.0615474	0.0478469	0.0977562	0.0705812	0.0549248	0.036781	0.0414253	0.0576541	0.129306	0.0220754	0.0541119	0.0761854	0.0564419	0.0507782
cg08914623	ALX4	11	44284148	0.010786	0.0106101	0.012122	0.00663482	0.00765101	0.0188501	0.0155353	0.0162637	0.00839653	0.0083236		0.0152397	0.0267947	0.00927592	0.00929032	0.0156658	0.00849968	0.012828	0.00433805	0.0150107	0.0183685		0.0864065	0.04424	0.0691972	0.0441556	0.0545922	0.130193	0.0412681	0.0792325	0.0584518	0.260413	0.140179	0.0762188	0.144367	0.093702	0.0711443	0.0884085	0.0370925	0.076309	0.138289	0.113431	0.0944011	0.116381	0.0892025	0.105594
cg09009380	PKP1	1	199519597	0.201953	0.270437	0.351466	0.287151	0.161859	0.427408	0.369309	0.215496	0.385623	0.274713		0.336867	0.175887	0.272783	0.187539	0.150597	0.163484	0.296505	0.214305	0.223408	0.470014		0.721704	0.673251	0.817011	0.691184	0.80715	0.729608	0.775712	0.809533	0.725125	0.830137	0.706017	0.72064	0.755251	0.813976	0.73958	0.769148	0.546544	0.759882	0.754118	0.829766	0.833457	0.805839	0.765447	0.789525
cg09053680	UTF1	10	134894104	0.0182243	0.0958377	0.0207935	0.0433863	0.0166844	0.0715988	0.0935417	0.0183895	0.0403394	0.114757		0.0808069	0.0791417	0.0661047	0.0826132	0.0326252	0.0111505	0.0186001	0.0226334	0.119715	0.0180433		0.0524993	0.099607	0.0678892	0.0811814		0.164527	0.0842495	0.127693	0.0524073	0.125517	0.0846413	0.0653573	0.120693	0.125862	0.0986497	0.0487273	0.0568116	0.0607664	0.112905	0.149024	0.0950281	0.151341	0.1592	0.0783414
cg09099744	CDKN2A	9	21958372	0.015856	0.067756	0.0291587	0.0322859	0.0138081	0.0247396	0.0368579	0.0132503	0.0194186	0.0210408		0.0381428	0.0313515	0.0283	0.0173977	0.0170854	0.0257069	0.018504	0.0273604	0.0235187	0.0304681		0.245383	0.202771	0.32114	0.194194	0.0833433	0.201513	0.174064	0.224415	0.270716	0.186696	0.151666	0.174977	0.328853	0.25756	0.224224	0.201768	0.163753	0.216346	0.278175	0.174509	0.130581	0.161539	0.312788	0.406441
cg09121849	SLC7A1	13	29067249	0.017998	0.019619	0.0191315	0.0187143	0.0173873	0.014772	0.015261	0.017285	0.0131945	0.0135978		0.0247004	0.0275381	0.0190267	0.0201625	0.0148447	0.0171308	0.0157964	0.0135262	0.0223816	0.0170218		0.077599	0.0784931	0.104196	0.0888826	0.0681204	0.225847	0.135	0.141466	0.0661056	0.353611	0.161563	0.0848814	0.0772198	0.0836545	0.104845	0.0730298	0.0602974	0.0880078	0.0560424	0.0432446	0.0689687	0.19487	0.0844957	0.0787723
cg09243021	CASP2	7	142695141	0.340465	0.393074	0.416707	0.397611	0.401781	0.399877	0.474817	0.302385	0.363799	0.427457		0.455282	0.440444	0.344053	0.33109	0.399796	0.415016	0.405382	0.409842	0.429935	0.444479		0.38382	0.376499	0.477888	0.381512	0.386401	0.38377	0.402977	0.436037	0.411042	0.424924	0.374825	0.40668	0.37267	0.296335	0.413052	0.512947	0.33851	0.433307	0.376409	0.381072	0.426507	0.412929	0.464576	0.332324
cg09328024	DYRK3	1	204874797	0.0634469	0.0873239	0.0593753	0.0498588	0.0520415	0.084485	0.0809935	0.0645678	0.0390197	0.0427065		0.0751283	0.0537878	0.0435138	0.0551862	0.0359523	0.0350352	0.0356004	0.0399308	0.0675085	0.03725		0.443493	0.373667	0.471726	0.418613	0.387556	0.39652	0.539208	0.426692	0.354959	0.381261	0.411095	0.327825	0.381657	0.47704	0.488937	0.482987	0.447354	0.456161	0.409631	0.381451	0.432741	0.456242	0.438713	0.349705
cg09461185	PTGS2	1	184916254	0.019138	0.0271829	0.0275851	0.0242458	0.0230483	0.0221767	0.0289283	0.0228226	0.02589	0.0179115		0.0345361	0.030204	0.0230452	0.0258123	0.0216161	0.0228188	0.0218469	0.0215916	0.0220962	0.024609		0.0862093	0.117236	0.0816199	0.108294	0.0946573	0.132602	0.119754	0.0775522	0.0880873	0.0641152	0.0911148	0.0697524	0.0771172	0.0840293	0.0916244	0.0695531	0.105865	0.102671	0.067619	0.105009	0.120019	0.0997779	0.144993	0.108292
cg09527362	C6orf150	6	74218863	0.0239615	0.0261477	0.0166411	0.0189168	0.0205602	0.0117458	0.0277537	0.0217559	0.0207608	0.0190516		0.0268466	0.0271773	0.0241748	0.0239739	0.0245406	0.0180311	0.0183648	0.0244153	0.0203683	0.0147365		0.107905	0.0851265	0.103827	0.110807	0.0925849	0.0897846	0.0858991	0.0717401	0.0808579	0.126346	0.079925	0.0710535	0.0686171	0.100448	0.0945891	0.0659172	0.0689655	0.0764287	0.0665031	0.0710914	0.129779	0.0963979	0.0819531	0.0754043
cg09595479	PRPH	12	47975479	0.0560144	0.0991044	0.0720794	0.0582433	0.0795396	0.0822953	0.132768	0.0528433	0.0556434	0.07		0.0876215	0.0700582	0.0562485	0.0810002	0.0586259	0.0597988	0.0730659	0.0627366	0.0740919	0.0426446		0.293973	0.318712	0.302855	0.231289	0.235083	0.396876	0.366667	0.367838	0.288528	0.375939	0.32075	0.203362	0.283595	0.193994	0.259658	0.367509	0.137572	0.346934	0.317636	0.423011	0.400182	0.507753	0.323968	0.527408
cg09671611	GPR114	16	56134975	0.583026	0.496775	0.510237	0.48409	0.542261	0.530711	0.507433	0.585907	0.526219	0.48945		0.491879	0.608997	0.519402	0.495468	0.499018	0.472496	0.54004	0.401693	0.453062	0.497706		0.773312	0.796786	0.813793	0.742352	0.777984	0.798353	0.797079	0.798682	0.791028	0.785825	0.781821	0.810927	0.811875	0.778143	0.741648	0.782618	0.732327	0.767663	0.807364	0.810324	0.778826	0.788311	0.773943	0.747596
cg10019507	SSTR4	20	22964315	0.503432	0.618776	0.461006	0.535341	0.472716	0.573966	0.400174	0.449187	0.554192	0.575751		0.478082	0.326031	0.503476	0.288589	0.419665	0.447488	0.476758	0.546222	0.507594	0.55956		0.592464	0.487115	0.566529	0.493092	0.41754	0.67446	0.502694	0.592529	0.572607	0.533549	0.532413	0.49321	0.59397	0.606143	0.483395	0.689575	0.361917	0.667245	0.64013	0.610105	0.550252	0.537032	0.552764	0.587735
cg10063179	MTNR1A	4	187713320	0.0847259	0.155364	0.0992044	0.0844563	0.0738611	0.117655	0.109147	0.0820513	0.0877141	0.0857085		0.163893	0.109854	0.0932366	0.0896907	0.0659814	0.0761114	0.0806021	0.0822229	0.109209	0.0681636		0.151975	0.140027	0.0941957	0.127076	0.0993674	0.140569	0.109194	0.1238	0.104944	0.249088	0.197772	0.138617	0.138571	0.120606	0.110549	0.104745	0.105842	0.103983	0.112046	0.0877978	0.180212	0.270141	0.234116	0.0893342
cg10088985	CXCL5	4	75083177	0.0340211	0.0597015	0.0701021	0.0653477	0.0435894	0.0380785	0.104958	0.0327303	0.028052	0.0420925		0.0440535	0.0363074	0.120138	0.0427114	0.0332812	0.0246085	0.0437253	0.0294767	0.0511811	0.0256171		0.0991364	0.102192	0.0912787	0.120597	0.0717421	0.151332	0.0984983	0.100823	0.135754	0.175913	0.0853954	0.136934	0.138836	0.0811332	0.140886	0.0652989	0.102015	0.108484	0.165247	0.0963618	0.164675	0.153899	0.160956	0.106524
cg10129493	CD33	19	56420398	0.166519	0.236393	0.139821	0.11071	0.10405	0.119701	0.185931	0.141611	0.10975	0.123708		0.161472	0.105758	0.151633	0.167321	0.160938	0.106156	0.144535	0.097852	0.0787618	0.0886076		0.696736	0.669132	0.622295	0.694168	0.614142	0.612949	0.555529	0.650734	0.685207	0.705795	0.717032	0.637037	0.640009	0.612458	0.568132	0.574724	0.628324	0.617324	0.640166	0.617195	0.520242	0.60188	0.624025	0.624013
cg10524192	OPRS1	9	34627478	0.0145372	0.0125795	0.0127451	0.0166538	0.0115431	0.0141371	0.0118977	0.00957218	0.0142371	0.0158952		0.0103069	0.0165423	0.0135707	0.0147078	0.011933	0.013754	0.0104278	0.00691578	0.0182032	0.0135078		0.0499121	0.0560911	0.0356491	0.0614743	0.0317768	0.0525456	0.0364638	0.0374874	0.0277074	0.0323741	0.0510189	0.046364	0.0411555	0.0354638	0.0418275	0.0400879	0.0413475	0.0496114	0.0317838	0.0302658	0.0538337	0.0649089	0.0496426	0.0371955
cg10556064	SMPD3	16	67038990	0.563832	0.698902	0.764069	0.671957	0.671942	0.758637	0.689951	0.564314	0.663479	0.642438		0.793316	0.616334	0.68877	0.707325	0.732019	0.669549	0.74181	0.609326	0.709091	0.744815		0.371998	0.428683	0.510559	0.386741	0.395935	0.596029	0.486583	0.630341	0.488345	0.578867	0.58568	0.481907	0.63349	0.558948	0.502306	0.579209	0.285199	0.569053	0.56202	0.649976	0.524474	0.5167	0.373277	0.539962
cg10588377	HTRA1	10	124211789	0.0237177	0.0344299	0.049424	0.0452695	0.0631913	0.0337102	0.0562688	0.0431972	0.0334957	0.0604065		0.047868	0.0371429	0.0416667	0.0401172	0.031952	0.0597215	0.0328029	0.0372686	0.0490341	0.0187744		0.151148	0.119771	0.183695	0.122132	0.109963	0.191154	0.0991211	0.188689	0.223069	0.304179	0.12662	0.187147	0.194471	0.197171	0.155512	0.162384	0.108377	0.236386	0.165071	0.292247	0.137978	0.1681	0.213469	0.158732
cg10618882	LRRC25	19	18370358	0.867647	0.832124	0.84889	0.863958	0.871744	0.85995	0.838171	0.868395	0.886914	0.886382		0.855523	0.908273	0.863545	0.865664	0.897711	0.862098	0.875384	0.853102	0.85031	0.880552		0.670951	0.669157	0.750879	0.616243	0.683094	0.634265	0.699291	0.700358	0.681904	0.685829	0.714898	0.62826	0.68591	0.649872	0.605839	0.656518	0.551372	0.674404	0.654418	0.607615	0.644413	0.594649	0.580625	0.617511
cg10681065	TFR2	7	100077108	0.446346	0.458065	0.430103	0.352164	0.423464	0.419533	0.397413	0.369302	0.454553	0.387611		0.444339	0.263338	0.45548	0.544905	0.457848	0.469909	0.373349	0.362169	0.382938	0.291365		0.710968	0.68777	0.701288	0.71094	0.769405	0.755278	0.668612	0.71979	0.706942	0.762077	0.719859	0.707114	0.762833	0.659479	0.735949	0.788449	0.715466	0.777499	0.756408	0.729029	0.694868	0.811312	0.747271	0.746984
cg10730174	PRRX1	1	168900183	0.0142077	0.0425059	0.0179216	0.0336352	0.0140404	0.0295649	0.0462479	0.03245	0.0153952	0.0296751		0.0495203	0.0297523	0.0340699	0.0215121	0.0230459	0.0160089	0.017892	0.0190114	0.0328727	0.0208776		0.127297	0.0916676	0.191244	0.158954	0.126503	0.193725	0.122491	0.174667	0.102019	0.209324	0.239026	0.112857	0.165004	0.115203	0.134514	0.157956	0.123042	0.172744	0.199142	0.19869	0.236756	0.189357	0.228529	0.208903
cg10737521	KIAA0676	5	179267849	0.072057	0.113344	0.0673063	0.0525045	0.0457288	0.0561937	0.0809692	0.0525328	0.0393239	0.0643252		0.0628423	0.0439873	0.0777228	0.0576137	0.0419177	0.0342548	0.0438129	0.0465194	0.054728	0.0648413		0.261973	0.25036	0.149525	0.27186	0.177509	0.215292	0.341083	0.302	0.224202	0.223401	0.237238	0.262395	0.216271	0.291871	0.395561	0.334531	0.280049	0.290844	0.209183	0.276892	0.273154	0.300905	0.355748	0.241173
cg10737625	THAP6	4	76658460	0.0381851	0.043515	0.063392	0.0532238	0.0466513	0.0376886	0.0569848	0.0481673	0.0467149	0.045679		0.0472352	0.0396868	0.0394956	0.0589024	0.0466201	0.0418842	0.0398068	0.0378348	0.0641496	0.0353723		0.0908147	0.0995173	0.0970656	0.0873467	0.0857042	0.114294	0.0557292	0.0869924	0.0752289	0.0896523	0.0713891	0.0994934	0.0766569	0.0791889	0.0885661	0.093268	0.0905467	0.0844126	0.0777846	0.0658444	0.0873411	0.0736206	0.09294	0.0853847
cg10913563	C8orf55	8	143805816	0.0151129	0.0182134	0.0173785	0.0158403	0.0171978	0.0109421	0.0178877	0.018166	0.0173938	0.0160235		0.0269182	0.0298957	0.0237906	0.0176737	0.0291424	0.016357	0.0114975	0.0144129	0.0196196	0.0147748		0.0975381	0.124562	0.100202	0.0896162	0.077732	0.0890431	0.107005	0.0771512	0.0884111	0.0829748	0.0783404	0.0807249	0.0808115	0.0884338	0.0842214	0.447985	0.0707178	0.404003	0.0832351	0.041528	0.0671044	0.0842669	0.0653237	0.0722991
cg10968649	JMJD2A	1	43888391	0.0108006	0.0120745	0.00811325	0.0103474	0.0107677	0.00532982	0.0119215	0.0115615	0.0105681	0.00951617		0.0139851	0.0112555	0.00898624	0.00992052	0.00920211	0.0103627	0.011344	0.00732016	0.0105032	0.00843575		0.0586562	0.0650436	0.0495875	0.0819996	0.0601093	0.0610525	0.0754261	0.04924	0.0649014	0.0532333	0.0449925	0.0571404	0.0406364	0.0592471	0.0598199	0.0511049	0.0571711	0.0760441	0.0474838	0.0406133	0.0615234	0.0689989	0.0693598	0.0443533
cg11038843	B3GAT1	11	133786601	0.0873908	0.144346	0.160967	0.141959	0.152412	0.115989	0.117939	0.138345	0.117304	0.144361		0.114389	0.171975	0.123113	0.0930843	0.185775	0.0857909	0.148148	0.14195	0.0820368	0.0804151		0.265728	0.359406	0.337164	0.189759	0.25763	0.335803	0.220494	0.417006	0.208333	0.268121	0.4024	0.431641	0.351934	0.316642	0.323976	0.237447	0.251005	0.316774	0.341128	0.305026	0.268805	0.591809	0.378817	0.257028
cg11140785	ZNF264	19	62395113	0.0100065	0.00706154	0.014511	0.0129247	0.0101901	0.0144392	0.0193147	0.0100278	0.0147783	0.0110612		0.0160224	0.0685232	0.0137908	0.0153817	0.0111457	0.0139215	0.0140005	0.0180683	0.0199637	0.012848		0.0743871	0.0707105	0.0548397	0.0896189	0.0757335	0.0891885	0.0819175	0.0683911	0.0555288	0.0693616	0.0691275	0.054902	0.0578645	0.059917	0.0947695	0.0458631	0.0622717	0.0604839	0.0395954	0.0403357	0.107167	0.0964801	0.0622418	0.0631749
cg11201532	MFNG	22	36212024	0.044097	0.0448544	0.0458937	0.0490545	0.0322751	0.0354992	0.0495416	0.030722	0.0441024	0.0415713		0.0468112	0.0955285	0.0497884	0.0351494	0.0424914	0.0367304	0.0218818	0.0590278	0.0419788	0.0298406		0.675323	0.660479	0.749676	0.625016	0.589972	0.592833	0.666026	0.595301	0.669202	0.653574	0.724194	0.698915	0.629472	0.652596	0.659211	0.715883	0.696155	0.683167	0.652576	0.711402	0.621127	0.69965	0.636381	0.69123
cg11233384	AKR7A3	1	19488289	0.192976	0.126217	0.168359	0.185421	0.259854	0.120736	0.197729	0.145798	0.195393	0.191719		0.180518	0.136876	0.199264	0.138148	0.175689	0.164822	0.163414	0.136199	0.186656	0.0986253		0.285897	0.34138	0.378369	0.38143	0.35507	0.362591	0.361465	0.317478	0.356229	0.310751	0.337602	0.367989	0.312349	0.317502	0.376041	0.317669	0.307319	0.308753	0.326304	0.268461	0.303129	0.341532	0.332409	0.322749
cg11380128	PRLH	2	238138539	0.898404	0.88775	0.897452	0.883844	0.885983	0.937409	0.891442	0.918615	0.922811	0.896369		0.872901	0.882598	0.884285	0.902592	0.893432	0.892355	0.908382	0.835841	0.901622	0.924456		0.449685	0.33619	0.519107	0.457419	0.4004	0.517648	0.542135	0.5146	0.512457	0.561706	0.506679	0.48861	0.598809	0.535355	0.484523	0.36506	0.482496	0.413409	0.609031	0.422821	0.267939	0.41851	0.50826	0.346799
cg11389172	SLC18A3	10	50488305	0.0335954	0.0581136	0.0478155	0.0647105	0.0304185	0.0679918	0.0511415	0.0353564	0.0318365	0.0867376		0.0345834	0.0381016	0.0475103	0.0457308	0.0314477	0.0344404	0.0455846	0.0223023	0.0746385	0.0355927		0.0567989	0.0610018	0.0926178	0.199076	0.0576759	0.23705	0.0509575	0.113258	0.0694717	0.22433	0.1138	0.12588	0.101673	0.178136	0.0695547	0.0667927	0.0544615	0.0926222	0.103907	0.0960894	0.0607395	0.278381	0.108179	0.149288
cg11418559	ZNF593	1	26360515	0.510278	0.408695	0.63708	0.490797	0.491031	0.559555	0.666551	0.462849	0.621987	0.543942		0.539103	0.494513	0.519726	0.434642	0.614546	0.473937	0.388264	0.406829	0.522316	0.474708		0.441017	0.430553	0.411029	0.353279	0.4405	0.447433	0.560603	0.365756	0.421262	0.541639	0.550295	0.419114	0.391479	0.506653	0.623414	0.447712	0.469612	0.513917	0.390152	0.459603	0.456163	0.600507	0.443252	0.397935
cg11432797	SPN	16	29581988	0.0235855	0.0425504	0.0201966	0.036915	0.0210615	0.0313972	0.0397503	0.0300546	0.0346546	0.031551		0.059625	0.0593508	0.0394372	0.0317381	0.0351262	0.0186954	0.0166993	0.0241577	0.0295761	0.0393277		0.828454	0.835381	0.804289	0.776218	0.817918	0.746191	0.84025	0.835082	0.760916	0.775204	0.821176	0.843982	0.838092	0.795136	0.837357	0.806079	0.806008	0.800087	0.821417	0.865991	0.887191	0.849797	0.834553	0.820919
cg11582100	GAD1	2	171381453	0.0283707	0.033318	0.026844	0.0182252	0.0367268	0.0448232	0.0563919	0.0387985	0.0298583	0.0289553		0.0504251	0.0378821	0.0243471	0.0393977	0.036061	0.0452105	0.0260791	0.0260486	0.0402389	0.0609598		0.0779497	0.0690554	0.0700763	0.0703518	0.0772213	0.087892	0.0604435	0.129215	0.0732398	0.103519	0.0752225	0.101758	0.0738286	0.0806433	0.0768158	0.0576986	0.0654446	0.0823274	0.0605273	0.037037	0.0891294	0.0906426	0.0855233	0.083313
cg11648289	EN2	7	154942435	0.0151855	0.0307838	0.0195261	0.01603	0.0145439	0.0160494	0.0209962	0.0233546	0.0174195	0.0168165		0.0212255	0.0358085	0.0295316	0.0306995	0.0272624	0.012525	0.0166801	0.0218194	0.0205273	0.0144372		0.074569	0.0633123	0.12154	0.10175	0.102995	0.235686	0.0962184	0.223592	0.0823235	0.228761	0.108393	0.0907543	0.115307	0.127223	0.0702378	0.0662058	0.0836388	0.0936747	0.0876812	0.16108	0.141349	0.17797	0.151655	0.152899
cg11695684	CHRND	2	233099509	0.930862	0.915517	0.887765	0.952521	0.931885	0.940405	0.904459	0.905813	0.882012	0.944739		0.895059	0.956658	0.904268	0.923364	0.906855	0.937772	0.93254	0.954173	0.929578	0.937894		0.825092	0.815126	0.831489	0.778832	0.752121	0.757772	0.863352	0.819308	0.80855	0.869857	0.813083	0.815289	0.826001	0.85807	0.800894	0.780186	0.781894	0.831128	0.781829	0.794703	0.787292	0.771558	0.729737	0.785558
cg11846956	KLK10	19	56212194	0.0475334	0.0612556	0.046825	0.0562949	0.043392	0.0747087	0.118857	0.0363913	0.0401237	0.0506713		0.0795981	0.0550753	0.0779285	0.0607504	0.0630895	0.0399662	0.0446361	0.0428262	0.0906403	0.0315287		0.112413	0.214571	0.0920972	0.130614	0.252915	0.142148	0.130899	0.29475	0.0722209	0.142815	0.203749	0.0752282	0.14737	0.145151	0.0623801	0.151141	0.0988216	0.116675	0.138384	0.117369	0.0728377	0.0979583	0.185564	0.186344
cg11908570	KIAA0040	1	173428667	0.0841261	0.122991	0.10129	0.0918307	0.0752791	0.0734877	0.0681334	0.0850987	0.0363615	0.0387018		0.0539585	0.0942623	0.0808581	0.0627887	0.0621959	0.0482563	0.0463576	0.0321775	0.0588362	0.0780461		0.0565635	0.0417053	0.0621019	0.0651701	0.0529757	0.0675765	0.0423775	0.0456676	0.0499751	0.0502307	0.0560527	0.0597526	0.048497	0.0465892	0.0717511	0.03617	0.0634648	0.0710612	0.0430935	0.0371429	0.0535554	0.0517721	0.102456	0.056791
cg12063359	KCNK15	20	42808046	0.0100405	0.0182773	0.0188112	0.0177506	0.0172253	0.00928431	0.0183834	0.0156737	0.0149654	0.00981622		0.0152111	0.0121983	0.0122522	0.0136759	0.0226134	0.0158046	0.0131585	0.00966943	0.024454	0.00752273		0.0462783	0.121671	0.069473	0.0772065	0.0434338	0.0799169	0.0472939	0.04782	0.0551956	0.219171	0.0512362	0.0502038	0.147115	0.0740178	0.0543345	0.0366855	0.0464637	0.0366825	0.231785	0.0554002	0.0803775	0.085685	0.0431046	0.0501129
cg12111714	ATP8A2	13	24941472	0.247983	0.455794	0.302316	0.257063	0.329314	0.338859	0.287858	0.274685	0.203483	0.167033		0.387887	0.290268	0.28	0.289582	0.248634	0.241213	0.198468	0.266287	0.245964	0.257857		0.258415	0.244055	0.382388	0.405622	0.23984	0.372811	0.356273	0.335354	0.266199	0.461448	0.275705	0.294349	0.271003	0.337214	0.337671	0.210801	0.306646	0.25106	0.285913	0.352374	0.337043	0.275385	0.310372	0.328345
cg12188560	CNTFR	9	34581192	0.0258303	0.0338288	0.0211676	0.0145191	0.0452279	0.0259122	0.0470193	0.0189252	0.0343958	0.0127941		0.0435111	0.0194611	0.0266728	0.0293488	0.0274252	0.0287576	0.0165145	0.0185083	0.0376705	0.0204385		0.38679	0.445217	0.451124	0.338587	0.252534	0.38793	0.26303	0.365777	0.383111	0.490706	0.402101	0.286954	0.358771	0.30745	0.380786	0.434928	0.23831	0.501715	0.33866	0.365655	0.416185	0.293636	0.382652	0.286066
cg12238343	RLN3R1	5	33972159	0.0145176	0.0156756	0.0215442	0.029688	0.0261521	0.0208044	0.0336043	0.0186227	0.0183839	0.025878		0.0316763	0.0365974	0.0232156	0.0326222	0.0128656	0.0242021	0.0166826	0.0184217	0.0257534	0.0225096		0.0783818	0.0737132	0.0956452	0.0848	0.0770272	0.113888	0.0599479	0.100854	0.072171	0.0808459	0.114968	0.0596105	0.115623	0.0567525	0.0839379	0.0851707	0.0717445	0.100668	0.0907197	0.0940224	0.0996127	0.142749	0.127016	0.138857
cg12448933	RAB37	17	70178973	0.049974	0.171544	0.0909091	0.0379389	0.110148	0.0712989	0.111875	0.0826126	0.0498296	0.0945156		0.0751413	0.0947768	0.189037	0.136342	0.0695771	0.0502178	0.0409524	0.0523241	0.115769	0.032139		0.0618333	0.0815047	0.0768217	0.0915286	0.0499829	0.0821593	0.0639148	0.0553662	0.0546635	0.08565	0.120884	0.0606439	0.0818392	0.145085	0.118876	0.0433205	0.061928	0.063139	0.0770166	0.177604	0.121234	0.145688	0.114228	0.056516
cg12616487	EML3	11	62135639	0.828633	0.828789	0.839825	0.868818	0.851142	0.864979	0.838534	0.826261	0.889148	0.891134		0.78964	0.808452	0.822306	0.823529	0.842923	0.825804	0.899309	0.848898	0.873198	0.846145		0.794922	0.809401	0.813725	0.791943	0.809128	0.799462	0.805902	0.812132	0.801569	0.820515	0.841097	0.82871	0.823388	0.836484	0.849286	0.833214	0.759715	0.830415	0.834027	0.852078	0.864085	0.864155	0.828565	0.843372
cg12758687	DRD2	11	112851537	0.170082	0.254736	0.206405	0.15099	0.159291	0.172955	0.255824	0.189463	0.181441	0.181219		0.234493	0.151408	0.20845	0.159037	0.144212	0.176164	0.129522	0.189075	0.208229	0.114539		0.217854	0.199764	0.170455	0.180041	0.155102	0.212511	0.156939	0.192923	0.164594	0.14189	0.214643	0.164399	0.254761	0.257603	0.13443	0.135202	0.166148	0.176399	0.180811	0.18382	0.147259	0.23158	0.182484	0.230699
cg12770741	NXN	17	830526	0.739863	0.637999	0.770794	0.689613	0.782635	0.655497	0.706964	0.787598	0.731996	0.852293		0.72152	0.747462	0.55639	0.674369	0.585197	0.68968	0.629152	0.770422	0.786786	0.882471		0.741128	0.66046	0.773645	0.611648	0.794413	0.668103	0.821971	0.731987	0.662781	0.752126	0.775586	0.730952	0.742565	0.714254	0.714661	0.803012	0.677033	0.840482	0.7524	0.699031	0.778674	0.656609	0.684411	0.674064
cg12967560	LYSMD4	15	98091718	0.918849	0.931226	0.927717	0.928214	0.95504	0.956098	0.938285	0.932375	0.924059	0.929059		0.930753	0.927774	0.931632	0.887497	0.937112	0.940545	0.945177	0.939411	0.923167	0.928588		0.518892	0.596551	0.585367	0.452144	0.476646	0.521672	0.604237	0.515629	0.567988	0.595764	0.564689	0.620423	0.596842	0.553591	0.502165	0.452054	0.538211	0.494071	0.561837	0.586818	0.558583	0.595078	0.582188	0.469228
cg13074965	MGC15912	11	66151881	0.922455	0.86606	0.899925	0.890442	0.902419	0.153553	0.8416	0.909774	0.906012	0.906432		0.884957	0.907023	0.908077	0.892434	0.93185	0.850088	0.906052	0.931956	0.858946	0.894055		0.872464	0.87154	0.882261	0.858538	0.878178	0.874044	0.881507	0.900409	0.857916	0.869845	0.879006	0.89757	0.874136	0.85856	0.874534	0.876604	0.880192	0.880942	0.882967	0.887703	0.867187	0.878186	0.863407	0.8683
cg13081704	KCNQ1DN	11	2847033	0.298412	0.397661	0.469514	0.465843	0.287529	0.687978	0.607763	0.362563	0.442436	0.606954		0.329609	0.317126	0.409065	0.500325	0.301969	0.436074	0.355311	0.396967	0.536967	0.114748		0.892809	0.732691	0.911084	0.79241	0.808328	0.825568	0.776651	0.914498	0.861594	0.770573	0.83173	0.839028	0.833532	0.836043	0.801728	0.747077	0.7734	0.749962	0.84457	0.834331	0.799749	0.780775	0.832338	0.912801
cg13191049	DMN	15	97463186	0.0387696	0.0477786	0.0518773	0.0563311	0.026648	0.0659608	0.114236	0.0550848	0.0324694	0.0894642		0.0453219	0.0506539	0.0591449	0.0491894	0.0363193	0.0697583	0.036342	0.0391578	0.0906266	0.0358399		0.071001	0.0681132	0.0685493	0.0962948	0.0565296	0.0794843	0.0779353	0.0534329	0.0798372	0.0677805	0.0900762	0.0625849	0.0545753	0.0767015	0.0623113	0.0573126	0.086733	0.0672614	0.0669488	0.0662728	0.098152	0.108957	0.0986978	0.083807
cg13266631	NEFL	8	24870923	0.0332492	0.0497205	0.0336779	0.0449706	0.0464942	0.0474629	0.0506752	0.0520579	0.0273576	0.0426095		0.047714	0.0638444	0.0423645	0.0360943	0.0391268	0.0405262	0.0309664	0.0268833	0.0322748	0.041793		0.234455	0.378758	0.354664	0.31815	0.252545	0.269159	0.216225	0.438025	0.245821	0.334818	0.243554	0.217918	0.423299	0.330741	0.246289	0.2127	0.196372	0.263814	0.373989	0.321236	0.243016	0.296673	0.393803	0.308149
cg13269407	FLJ10945	22	44828771	0.179548	0.114758	0.392819	0.287448	0.0501386	0.318633	0.112107	0.300368	0.172644	0.126075		0.0676428	0.206861	0.104774	0.289933	0.120061	0.17882	0.149496	0.0617796	0.138535	0.17243		0.353956	0.333836	0.421233	0.313016	0.268023	0.377837	0.323611	0.387621	0.366516	0.355413	0.437141	0.336631	0.372884	0.387901	0.419236	0.351173	0.288109	0.357316	0.396356	0.342802	0.419022	0.326295	0.379614	0.34521
cg13282837	TCL1A	14	95250401	0.233754	0.189701	0.130898	0.123838	0.149505	0.210223	0.339132	0.107402	0.219517	0.0760271		0.138132	0.252751	0.178915	0.0906892	0.115911	0.121535	0.132096	0.0931507	0.233915	0.105842		0.312746	0.147577	0.52684	0.301334	0.149145	0.377942	0.250471	0.417827	0.316104	0.564836	0.336713	0.161511	0.237582	0.219246	0.352498	0.295046	0.164602	0.299398	0.207349	0.399108	0.519741	0.26978	0.355912	0.274973
cg13359415	LGI2	4	24641662	0.0132695	0.0469108	0.0153394	0.0319386	0.0198519	0.0699038	0.0531363	0.0269729	0.0202544	0.0695019		0.0518368	0.032633	0.0464567	0.0730892	0.0160612	0.0119161	0.0142764	0.0172796	0.0313789	0.0198979		0.0687753	0.0517595	0.0451918	0.0698464	0.0350178	0.0631563	0.0569911	0.0470912	0.0433376	0.0479825	0.0574903	0.0344274	0.0425637	0.0548387	0.0436858	0.0447664	0.0456056	0.0440721	0.0413622	0.0325558	0.0590623	0.0424524	0.0598519	0.0396668
cg13435381	LGR5	12	70119284	0.0621728	0.0751207	0.0583663	0.0574565	0.0532134	0.0519835	0.0781229	0.0469844	0.0475717	0.0462912		0.0682585	0.0460664	0.05838	0.055516	0.0495003	0.0335368	0.0345987	0.0352161	0.0528786	0.0281125		0.0872294	0.0717168	0.0618529	0.104041	0.0761723	0.100356	0.0806657	0.0654302	0.0707183	0.0773247	0.0711871	0.0609539	0.0515924	0.0692491	0.105232	0.0558599	0.0781314	0.0864939	0.0544392	0.0797482	0.103917	0.0821918	0.111807	0.0524364
cg13523557	ADCY1	7	45580250	0.0925564	0.102468	0.105455	0.103116	0.0917689	0.0758066	0.128106	0.107367	0.0953257	0.117507		0.0739973	0.0861152	0.102019	0.0938884	0.11424	0.109961	0.0711605	0.092691	0.139496	0.0609311		0.241194	0.243028	0.292721	0.184494	0.270067	0.297853	0.23482	0.291658	0.210135	0.277584	0.26013	0.190019	0.233037	0.354653	0.307425	0.260049	0.240153	0.221041	0.300551	0.298214	0.299216	0.289097	0.272369	0.269934
cg14089692	ADAM33	20	3610546	0.0817152	0.14109	0.119196	0.0723881	0.110649	0.0969615	0.121433	0.0669638	0.070043	0.0758189		0.0920963	0.0889942	0.0850997	0.0772024	0.0988925	0.0763209	0.0601896	0.0516651	0.097632	0.0496912		0.144869	0.142713	0.219783	0.164319	0.135498	0.150418	0.181098	0.152922	0.139175	0.189891	0.142274	0.107257	0.147025	0.127973	0.144623	0.141992	0.156785	0.189311	0.11274	0.12647	0.167348	0.177136	0.160292	0.181337
cg14123992	APOE	19	50099708	0.763188	0.801741	0.775763	0.722243	0.809066	0.780532	0.765899	0.789642	0.805771	0.810789		0.799208	0.797659	0.751865	0.820638	0.802372	0.754442	0.801647	0.753729	0.761202	0.785298		0.283301	0.344422	0.342906	0.332083	0.320226	0.360718	0.33538	0.264267	0.307683	0.302437	0.321871	0.284742	0.2911	0.335377	0.263701	0.31428	0.216904	0.325852	0.267616	0.232087	0.260365	0.275057	0.276331	0.252488
cg14304761	SYK	9	92603970	0.0334082	0.0575876	0.0339678	0.0299891	0.0309455	0.0335242	0.0482522	0.0357919	0.0309728	0.0319714		0.0761683	0.0315167	0.0416388	0.0452177	0.0269694	0.0363177	0.0311382	0.0265958	0.0362573	0.0336342		0.0798049	0.0616186	0.0640897	0.108627	0.071688	0.0697747	0.0724167	0.0883	0.0724802	0.0695489	0.0656783	0.0682134	0.07995	0.0682488	0.0962376	0.0657548	0.075388	0.077169	0.0774118	0.0596802	0.0996386	0.0834751	0.100254	0.0705571
cg14400118	MMP2	16	54070692	0.0779592	0.113388	0.0457937	0.0546726	0.0393996	0.0957317	0.0576048	0.0800383	0.0557157	0.097852		0.0921778	0.127445	0.0737569	0.0489192	0.0352505	0.0439	0.0410959	0.0557441	0.0851064	0.0595611		0.150134	0.0925455	0.114416	0.140017	0.100276	0.121339	0.107605	0.109995	0.0978456	0.102037	0.129266	0.104413	0.0885936	0.0977778	0.132283	0.0893929	0.116371	0.113444	0.0919744	0.0901387	0.178459	0.159779	0.112659	0.124446
cg14437986	C6orf25	6	31799014	0.178827	0.195082	0.198361	0.140344	0.210356	0.160073	0.249694	0.160632	0.221029	0.150279		0.168801	0.168332	0.1788	0.177552	0.245235	0.167714	0.140553	0.162717	0.192693	0.221846		0.686236	0.737919	0.718161	0.64681	0.76011	0.695043	0.754527	0.734703	0.765181	0.671878	0.746599	0.721146	0.675258	0.679271	0.731855	0.726349	0.699361	0.707118	0.702627	0.674091	0.677205	0.705854	0.729538	0.686983
cg14456683	ZIC1	3	148609700	0.231905	0.297493	0.261001	0.265899	0.260298	0.29256	0.257463	0.17028	0.19805	0.231369		0.365489	0.280334	0.206589	0.252042	0.296867	0.164909	0.179437	0.214527	0.199144	0.153459		0.134782	0.10974	0.228657	0.189149	0.14944	0.138552	0.212884	0.302808	0.109893	0.129444	0.269175	0.125428	0.116685	0.153065	0.132425	0.168811	0.121399	0.205618	0.134105	0.154058	0.16559	0.146697	0.226825	0.11418
cg14494596	SCOTIN	3	48517044	0.262488	0.250425	0.240085	0.258725	0.24083	0.174062	0.266964	0.233482	0.259401	0.21581		0.166864	0.178972	0.229909	0.235562	0.243319	0.250418	0.207465	0.17795	0.20953	0.196189		0.263776	0.295357	0.344639	0.214946	0.224659	0.251012	0.315965	0.236999	0.218703	0.217581	0.259383	0.239201	0.21781	0.269655	0.325645	0.324908	0.23811	0.290394	0.198774	0.246927	0.250071	0.225081	0.240167	0.229132
cg14654926	FGF10	5	44424445	0.0698488	0.0928754	0.0748354	0.0514051	0.0625842	0.0454667	0.0792164	0.0763973	0.0793129	0.0795464		0.0976154	0.0471328	0.0984947	0.176179	0.0824585	0.0636664	0.0372928	0.0429526	0.0348259	0.0407889		0.194711	0.381033	0.291453	0.223126	0.2724	0.516678	0.312162	0.303922	0.301669	0.478959	0.374768	0.216432	0.213087	0.331359	0.244442	0.414335	0.214253	0.383537	0.245281	0.222074	0.259835	0.357812	0.320349	0.256014
cg14696396	TM6SF1	15	81567450	0.0259852	0.0613105	0.0380741	0.0281634	0.0357057	0.0190067	0.0495509	0.0452474	0.0478121	0.0871562		0.0335174	0.0399256	0.082417	0.0335186	0.0384991	0.0232707	0.0284487	0.0265563	0.0466748	0.0165813		0.0693912	0.166157	0.183228	0.0847065	0.108786	0.227312	0.0724161	0.360725	0.114957	0.431267	0.113874	0.187222	0.366264	0.142244	0.0937399	0.380474	0.0923584	0.42536	0.373207	0.472589	0.337534	0.275307	0.249533	0.117683
cg14859460	GRM6	5	178354850	0.075088	0.144996	0.0942845	0.0941155	0.0724891	0.110946	0.152621	0.111406	0.0934482	0.110947		0.172702	0.0885328	0.115579	0.161822	0.0783978	0.0566444	0.0511364	0.0420495	0.134269	0.0557264		0.613678	0.46784	0.578577	0.446239	0.386917	0.660803	0.435231	0.606691	0.683637	0.689575	0.4741	0.483328	0.554631	0.531567	0.475461	0.59788	0.229133	0.638758	0.632488	0.690033	0.45783	0.622065	0.593553	0.619874
cg14882700	OTOP1	4	4279472	0.160641	0.258257	0.24993	0.226766	0.183991	0.326913	0.307896	0.221884	0.194431	0.217172		0.30206	0.311863	0.305228	0.183867	0.204231	0.226835	0.200998	0.188679	0.301322	0.204415		0.147647	0.161476	0.219583	0.21079	0.129361	0.211308	0.204391	0.246414	0.164802	0.249031	0.233578	0.136825	0.210956	0.21488	0.163691	0.217649	0.139398	0.210807	0.166382	0.18585	0.184607	0.159059	0.247996	0.174476
cg14894144	LAMA3	18	19524552	0.503706	0.518634	0.485041	0.43283	0.336404	0.465089	0.486535	0.425126	0.455141	0.500943		0.440524	0.385151	0.475233	0.431978	0.44005	0.455022	0.408087	0.334055	0.432092	0.80708		0.185842	0.213247	0.250695	0.244738	0.303692	0.36826	0.311623	0.319606	0.209805	0.267944	0.292728	0.258238	0.268293	0.403019	0.172174	0.289793	0.160206	0.298936	0.275397	0.306322	0.259386	0.241346	0.303083	0.246703
cg15201877	PTGER3	1	71285561	0.0917787	0.167288	0.0944611	0.0748936	0.0914516	0.0845393	0.137075	0.0736684	0.0655364	0.0787444		0.118976	0.0912014	0.079249	0.0737244	0.0790279	0.0757434	0.0560206	0.0483838	0.0726649	0.0805618		0.0712888	0.0718443	0.0828013	0.0656304	0.0510135	0.173992	0.0742786	0.136742	0.105387	0.0907157	0.0730374	0.0652425	0.27374	0.0784238	0.073002	0.0553856	0.0655678	0.0754822	0.250255	0.182541	0.0804132	0.117496	0.0764779	0.0653411
cg15239123	SMOC1	14	69416166	0.0394669	0.0429286	0.0366075	0.0311796	0.039268	0.0359667	0.0385411	0.0435625	0.0394262	0.0344471		0.054022	0.0338408	0.0422313	0.0395986	0.041696	0.0393714	0.0284783	0.0355287	0.0426007	0.0258483		0.0954428	0.105787	0.0738939	0.112751	0.0872483	0.310979	0.094378	0.146495	0.064806	0.0992039	0.180407	0.0830356	0.117226	0.20995	0.132854	0.0858605	0.0816983	0.0908306	0.135638	0.209486	0.160522	0.139201	0.375272	0.174077
cg15352315	CD302	2	160363282	0.2124	0.324182	0.230688	0.281525	0.265928	0.341911	0.258022	0.272141	0.232686	0.211306		0.325781	0.190064	0.254401	0.225714	0.270565	0.193012	0.184437	0.169893	0.207832	0.187511		0.256391	0.272969	0.42048	0.285098	0.24852	0.225794	0.384547	0.337336	0.349895	0.366562	0.310786	0.296226	0.344528	0.342547	0.265858	0.236833	0.197418	0.267141	0.33273	0.315429	0.306861	0.305667	0.321209	0.220149
cg15413566	ICA1	7	8268496	0.118304	0.0923157	0.0894239	0.102572	0.0710768	0.0769732	0.12293	0.0949834	0.115565	0.0929328		0.0942527	0.0818894	0.092722	0.110668	0.0881394	0.0692691	0.0964271	0.0838888	0.178891	0.0719492		0.112941	0.112127	0.124869	0.133237	0.108618	0.124924	0.129716	0.0796157	0.100123	0.0964562	0.0961295	0.100785	0.1045	0.0939937	0.115009	0.0953971	0.0797348	0.0884943	0.0861644	0.121594	0.13252	0.132687	0.135139	0.143301
cg15426734	PARD6A	16	66252773	0.0511573	0.114944	0.0636583	0.0417769	0.0450484	0.0369975	0.0699849	0.0559582	0.0336313	0.0508626		0.0572383	0.0421899	0.0739949	0.0459027	0.0466956	0.0316933	0.0438705	0.0495915	0.0314016	0.0486097		0.229682	0.17143	0.240523	0.21847	0.148097	0.202501	0.229947	0.19991	0.186272	0.203642	0.229175	0.14514	0.212117	0.283229	0.228279	0.235274	0.168295	0.244878	0.218999	0.203457	0.203877	0.179714	0.217025	0.169113
cg15501381	NGB	14	76807553	0.652351	0.717131	0.589086	0.632927	0.535649	0.720643	0.673033	0.720737	0.65669	0.501563		0.772239	0.68845	0.594667	0.726844	0.553622	0.638744	0.545929	0.586791	0.650239	0.756483		0.520109	0.547965	0.652298	0.637946	0.557941	0.666789	0.686912	0.674441	0.57732	0.792439	0.72296	0.562241	0.684122	0.682119	0.633163	0.617049	0.487879	0.666163	0.685287	0.690708	0.704365	0.742481	0.711696	0.473185
cg15536230	H2BFS	21	43809520	0.497097	0.58871	0.590273	0.497702	0.455055	0.359143	0.48158	0.414126	0.599582	0.478484		0.492779	0.279414	0.578293	0.55155	0.486118	0.548563	0.473195	0.464424	0.598611	0.257388		0.853342	0.900375	0.899633	0.89717	0.843158	0.860391	0.872793	0.832632	0.868308	0.858356	0.88851	0.876555	0.858019	0.814482	0.820315	0.8587	0.874234	0.877813	0.874457	0.881593	0.887264	0.86553	0.877492	0.873869
cg15607672	OTX2	14	56346980	0.157966	0.210789	0.190988	0.153635	0.149915	0.177478	0.194441	0.143029	0.13466	0.179929		0.172192	0.246226	0.189242	0.14408	0.199785	0.130336	0.144585	0.120595	0.179261	0.131553		0.254261	0.271321	0.277506	0.286092	0.241197	0.317059	0.244988	0.300314	0.289031	0.349094	0.234168	0.20696	0.268825	0.230848	0.287744	0.268694	0.278278	0.25051	0.256418	0.342049	0.28778	0.226282	0.302913	0.258922
cg15748507	PRLHR	10	120344617	0.36398	0.439219	0.258256	0.372253	0.390466	0.447712	0.3128	0.283148	0.260587	0.26117		0.478107	0.387116	0.372298	0.198667	0.284798	0.19136	0.19585	0.246877	0.32136	0.236243		0.383011	0.264625	0.563412	0.488625	0.538652	0.428222	0.33719	0.537452	0.532664	0.498746	0.631297	0.528	0.631833	0.667731	0.539517	0.416853	0.3071	0.440537	0.617054	0.538087	0.40785	0.402533	0.607409	0.626438
cg15839448	SFRP1	8	41285687	0.0316348	0.0697389	0.0356604	0.0595991	0.0337254	0.0833933	0.0754771	0.0587876	0.0690045	0.0894793		0.0776431	0.048275	0.047574	0.0565079	0.042923	0.0405141	0.037959	0.0364759	0.0661554	0.0397149		0.0735902	0.119961	0.072668	0.0832123	0.0871245	0.130558	0.0966597	0.10868	0.125919	0.0930033	0.148189	0.140933	0.213954	0.255382	0.193967	0.179293	0.0950353	0.154995	0.159956	0.129725	0.143409	0.12876	0.222923	0.082511
cg15963417	PAH	12	101835430	0.0220345	0.03573	0.0360548	0.0174467	0.0282456	0.0253698	0.0416066	0.0301233	0.0303804	0.0270027		0.0412077	0.0215819	0.0256058	0.0306765	0.0292425	0.0302573	0.0309629	0.0133536	0.029899	0.0196499		0.0902523	0.101324	0.137188	0.100991	0.108845	0.192895	0.0968685	0.0770805	0.119912	0.0888574	0.143906	0.0723564	0.0866767	0.0903924	0.102009	0.0725682	0.0925027	0.0932826	0.0882733	0.125926	0.149671	0.123134	0.136723	0.129819
cg16098981	C20orf39	20	24397865	0.0402767	0.0771575	0.0513347	0.0444132	0.0448616	0.0667356	0.0867966	0.0605239	0.0621131	0.0542654		0.0620181	0.0415887	0.0611884	0.0662732	0.0457308	0.0358168	0.043379	0.0370104	0.0496341	0.0370613		0.15087	0.150588	0.135499	0.19581	0.100689	0.156654	0.113878	0.142358	0.0901597	0.191829	0.188132	0.0623048	0.115885	0.170481	0.0779743	0.0793651	0.117526	0.118731	0.0864163	0.112975	0.18744	0.185521	0.143673	0.116221
cg16211684	PCDH21	10	85944602	0.0480536	0.062529	0.0505357	0.0467626	0.0404468	0.0452479	0.0622014	0.0525347	0.0465359	0.0500707		0.0641231	0.042807	0.0621194	0.0512072	0.0494988	0.0401279	0.0316862	0.0393443	0.0363785	0.025277		0.137118	0.119751	0.120016	0.107289	0.0894006	0.172579	0.103548	0.129766	0.12201	0.296118	0.147581	0.144817	0.15998	0.101444	0.109994	0.081907	0.105665	0.126459	0.192143	0.134595	0.116658	0.171955	0.125784	0.137032
cg16302441	POMC	2	25245334	0.473926	0.595543	0.451817	0.351221	0.454244	0.474062	0.365865	0.600569	0.506606	0.447135		0.401709	0.434026	0.435052	0.428775	0.449765	0.422412	0.435506	0.513093	0.431028	0.345174		0.275514	0.248753	0.295407	0.300382	0.290081	0.276162	0.279536	0.219775	0.303503	0.238363	0.279457	0.244942	0.243492	0.268174	0.349006	0.194121	0.299595	0.234789	0.253869	0.320853	0.374175	0.229824	0.241476	0.2335
cg16352283	FAM46B	1	27211565	0.182615	0.287199	0.20042	0.227012	0.191727	0.222177	0.217927	0.12845	0.171858	0.140454		0.200638	0.199977	0.175765	0.190786	0.222155	0.150251	0.125449	0.181197	0.170106	0.150957		0.503071	0.521824	0.688673	0.370453	0.465422	0.484214	0.570662	0.601781	0.479687	0.54408	0.401942	0.537971	0.488571	0.385694	0.443938	0.412746	0.443967	0.43251	0.475948	0.53179	0.604217	0.513305	0.468339	0.430845
cg16376234	TOP1	20	39090920	0.105644	0.0923155	0.0882216	0.08982	0.110227	0.0816053	0.0747193	0.0904149	0.115865	0.0755002		0.106559	0.0743901	0.101836	0.0976933	0.108109	0.111562	0.0971888	0.112819	0.0978371	0.0616493		0.0897401	0.0947331	0.0952716	0.0975262	0.112859	0.103246	0.0966181	0.102729	0.122005	0.106806	0.129482	0.104475	0.0970554	0.0969922	0.0839799	0.0822157	0.0934048	0.102751	0.092656	0.0884513	0.113746	0.101631	0.114632	0.110893
cg16842214	KBTBD5	3	42702164	0.336221	0.378881	0.584187	0.472929	0.557798	0.43464	0.396358	0.451727	0.448443	0.599092		0.364466	0.381624	0.357568	0.366212	0.369033	0.533935	0.424269	0.287114	0.504345	0.423546		0.29621	0.200223	0.275943	0.291531	0.253762	0.298936	0.16884	0.26147	0.357603	0.291252	0.295448	0.247027	0.35611	0.290023	0.238177	0.31051	0.191221	0.34935	0.33766	0.248726	0.226116	0.242886	0.272589	0.296861
cg16864658	CCK	3	42281154	0.0694746	0.0843862	0.123372	0.066145	0.102778	0.166667	0.0940788	0.0912467	0.181389	0.125383		0.168204	0.130533	0.10914	0.115142	0.0865004	0.048731	0.073991	0.076694	0.0776089	0.0542986		0.175464	0.178487	0.14891	0.25902	0.158213	0.252544	0.16519	0.228496	0.214392	0.313478	0.254246	0.151199	0.280259	0.323751	0.199101	0.263168	0.168452	0.288222	0.324132	0.331408	0.245275	0.33596	0.280575	0.264939
cg17029168	NKX2-2	20	21442547	0.0969638	0.107932	0.0742223	0.0682526	0.0928962	0.0816627	0.12023	0.0694001	0.0960533	0.0797952		0.127661	0.0484337	0.0906474	0.101529	0.0835576	0.0755016	0.0532176	0.0652016	0.0891843	0.0573076		0.193253	0.25485	0.251438	0.127593	0.138074	0.255902	0.107561	0.273422	0.289773	0.364038	0.1586	0.114857	0.253999	0.147383	0.156283	0.134381	0.152913	0.155664	0.316747	0.19697	0.127845	0.158157	0.215677	0.165547
cg17040807	CYGB	17	72044877	0.563504	0.533911	0.511443	0.517665	0.456883	0.526247	0.512578	0.462321	0.527383	0.444886		0.468849	0.517805	0.521604	0.507775	0.447201	0.465191	0.483755	0.414505	0.424487	0.362448		0.549996	0.507678	0.511468	0.468477	0.509013	0.54523	0.585117	0.577948	0.548995	0.521225	0.578316	0.442594	0.605068	0.508908	0.48473	0.571364	0.442428	0.609165	0.515509	0.628185	0.519985	0.48549	0.604156	0.554356
cg17105014	GYPC	2	127129833	0.179487	0.15524	0.136373	0.141226	0.139778	0.0908701	0.137892	0.107551	0.138155	0.102607		0.149661	0.0972045	0.159522	0.180769	0.164425	0.135102	0.125283	0.0758588	0.13713	0.11001		0.182554	0.196164	0.316555	0.261154	0.139639	0.345222	0.198232	0.256457	0.202126	0.195142	0.222838	0.218086	0.252268	0.178576	0.295953	0.26246	0.200552	0.359023	0.21337	0.3125	0.353181	0.255733	0.362849	0.313626
cg17119387	KIAA0664	17	2562181	0.0977706	0.108922	0.197248	0.0940645	0.0321213	0.0579513	0.162996	0.0630425	0.107034	0.0876531		0.151726	0.0166678	0.131263	0.0324542	0.0493094	0.0728556	0.0746068	0.0179306	0.0797082	0.0351136		0.0957778	0.134987	0.0769936	0.103738	0.117049	0.0941385	0.119311	0.10754	0.0952987	0.0995499	0.107937	0.0774613	0.069202	0.11195	0.0896125	0.0719554	0.124454	0.0877705	0.0624836	0.0897783	0.118766	0.120738	0.0914266	0.0573969
cg17133183	CRABP1	15	76419916	0.0188317	0.0248127	0.0279705	0.0209747	0.0233723	0.0361305	0.0253826	0.0167915	0.0143418	0.0167821		0.0217504	0.0289855	0.0300674	0.0164222	0.0247601	0.0221519	0.0237105	0.0116574	0.0220548	0.023464		0.29028	0.120492	0.349946	0.225551	0.21726	0.335497	0.271577	0.369227	0.133075	0.424074	0.497334	0.127192	0.356453	0.328623	0.37523	0.164804	0.216662	0.142764	0.383927	0.293973	0.168957	0.362916	0.38451	0.163872
cg17162024	UNQ9433	8	53641007	0.0427576	0.123849	0.04458	0.0570852	0.0578169	0.0722803	0.108827	0.0622432	0.0653109	0.105911		0.0852828	0.055366	0.0875143	0.0592283	0.0498801	0.0423361	0.0593725	0.040827	0.0689455	0.0508284		0.175838	0.14607	0.213472	0.10913	0.121617	0.252656	0.180731	0.322028	0.104279	0.428492	0.328473	0.145294	0.242077	0.545794	0.150943	0.402958	0.198457	0.403087	0.200819	0.380828	0.218427	0.349587	0.40094	0.141319
cg17188046	T	6	166502187	0.0391447	0.104307	0.0420162	0.0538876	0.0584138	0.0518841	0.0773676	0.0525598	0.0548674	0.084163		0.0549666	0.0430306	0.0584625	0.0581864	0.0617345	0.0396228	0.0365974	0.0475281	0.0677484	0.027003		0.252712	0.291165	0.311026	0.271456	0.338159	0.325027	0.197475	0.392335	0.339548	0.417025	0.369085	0.323371	0.438257	0.404998	0.239786	0.37347	0.156435	0.433923	0.410328	0.359751	0.489854	0.401689	0.357027	0.389201
cg17233601	PTPN5	11	18770994	0.794546	0.716064	0.727191	0.72888	0.595542	0.655534	0.680435	0.684981	0.706681	0.681015		0.610712	0.652154	0.669978	0.601554	0.69817	0.767029	0.834925	0.720891	0.768444	0.614624		0.430098	0.44745	0.510546	0.456868	0.466775	0.467304	0.455769	0.488911	0.556866	0.58042	0.554895	0.529194	0.497144	0.545791	0.488719	0.410987	0.434744	0.447746	0.504318	0.518867	0.431293	0.581207	0.494958	0.51036
cg17398595	SH3GL2	9	17568725	0.14345	0.180478	0.282718	0.218285	0.149475	0.203065	0.257416	0.191869	0.205748	0.177666		0.216091	0.250154	0.231716	0.45373	0.198004	0.199358	0.157854	0.106799	0.244348	0.0732679		0.266285	0.262487	0.23958	0.279707	0.220695	0.479288	0.233827	0.196685	0.209224	0.405585	0.32916	0.176646	0.311121	0.313201	0.226318	0.214589	0.166725	0.18349	0.31577	0.298397	0.259395	0.220569	0.407389	0.232214
cg17454897	ADAMTS10	19	8581471	0.0151515	0.0160977	0.0188583	0.0121602	0.00934725	0.0107761	0.0159561	0.0127235	0.0111903	0.0202032		0.0195852	0.0223693	0.0109659	0.0158327	0.0103747	0.0123877	0.0138308	0.0126634	0.0225622	0.0125903		0.0614793	0.0612459	0.105296	0.0841374	0.0774742	0.0949626	0.0745509	0.0740077	0.146316	0.259575	0.0853357	0.140383	0.149205	0.10307	0.0795029	0.0723795	0.0509951	0.0827376	0.138606	0.107623	0.103542	0.120544	0.204015	0.0738497
cg17457560	NRG1	8	32525393	0.0538978	0.161284	0.0770397	0.0641473	0.0650547	0.110067	0.162249	0.0735627	0.0593025	0.100728		0.117387	0.0736224	0.0840549	0.0822025	0.0404659	0.0447471	0.046985	0.0502015	0.109016	0.0589179		0.0961674	0.0865988	0.105288	0.131365	0.156821	0.244647	0.0669671	0.253192	0.135798	0.116181	0.210521	0.0613836	0.288107	0.101331	0.0807579	0.180108	0.0804598	0.101009	0.25331	0.160509	0.118657	0.142032	0.3507	0.126707
cg17468997	NCF1	7	74225559	0.254242	0.457881	0.374684	0.297989	0.330158	0.249853	0.30206	0.298662	0.292888	0.336111		0.360683	0.17259	0.303049	0.259852	0.293908	0.279472	0.250722	0.180797	0.325213	0.129294		0.708961	0.718461	0.742081	0.6641	0.699962	0.654024	0.743108	0.686527	0.667517	0.716885	0.739277	0.718581	0.707667	0.719437	0.673626	0.655827	0.697533	0.663319	0.712881	0.768718	0.774907	0.755565	0.756114	0.734831
cg17532978	NEUROD4	12	53699661	0.0657762	0.104542	0.122916	0.102956	0.0637295	0.066157	0.0926867	0.0770739	0.13534	0.0674559		0.118912	0.12577	0.0964383	0.125392	0.100182	0.0615385	0.063844	0.0459319	0.101174	0.0434009		0.0775008	0.0646835	0.064233	0.126908	0.0610857	0.121887	0.0782782	0.11822	0.0873268	0.096184	0.0632177	0.0674893	0.0816863	0.107063	0.0768104	0.0872313	0.0849612	0.104188	0.0788336	0.0846448	0.119665	0.0907164	0.16369	0.100816
cg17568996	NFAM1	22	41158069	0.0979853	0.090456	0.0837549	0.111335	0.0715174	0.124422	0.109006	0.0570483	0.0970573	0.142392		0.136491	0.0866021	0.104139	0.080486	0.122861	0.0824635	0.0803347	0.056563	0.0692238	0.0608108		0.394847	0.486693	0.447383	0.322982	0.356706	0.390995	0.476274	0.393932	0.405814	0.473744	0.45138	0.403597	0.411717	0.424595	0.404469	0.327138	0.383452	0.336683	0.431745	0.401917	0.446351	0.336441	0.393737	0.34617
cg17602451	BCL2	18	59136625	0.010429	0.0159701	0.0165673	0.0198901	0.0195865	0.0115044	0.0184639	0.0150989	0.0160191	0.0188602		0.0166996	0.0162124	0.0131861	0.0158922	0.0264525	0.0219037	0.018477	0.012027	0.0231096	0.0154154		0.0989086	0.0716014	0.0862241	0.103881	0.0594922	0.0934503	0.0715887	0.0991447	0.116977	0.0836444	0.0794311	0.0634953	0.113609	0.120238	0.0774652	0.0700884	0.0815594	0.0690944	0.129871	0.0684605	0.0720598	0.0810374	0.109994	0.0727337
cg17627559	TSPAN32	11	2280472	0.0707762	0.111182	0.0814072	0.0576552	0.0635386	0.0463773	0.108574	0.0389262	0.0566579	0.0781721		0.15721	0.0614074	0.036518	0.0441774	0.0601966	0.0368026	0.0548053	0.0409389	0.0456191	0.0575357		0.552977	0.510983	0.457134	0.531371	0.436743	0.530514	0.554256	0.484957	0.473045	0.515164	0.469418	0.384624	0.489756	0.48966	0.485867	0.470618	0.501174	0.461563	0.470901	0.474756	0.533596	0.483552	0.491909	0.492089
cg17647273	UPB1	22	23221452	0.889238	0.894279	0.869691	0.872205	0.90239	0.917401	0.899105	0.881062	0.910068	0.878501		0.866565	0.903382	0.906459	0.864736	0.903813	0.893985	0.913413	0.908512	0.901277	0.903749		0.733401	0.769713	0.776995	0.748635	0.70367	0.818481	0.830846	0.76955	0.798452	0.773174	0.765155	0.716873	0.825226	0.798208	0.798328	0.850918	0.722112	0.851085	0.816243	0.81683	0.731599	0.801629	0.74495	0.771971
cg17740305	GBP5	1	89510946	0.778013	0.615023	0.86061	0.706548	0.743271	0.715313	0.782021	0.683412	0.848608	0.818412		0.726149	0.713117	0.697688	0.791184	0.626371	0.862822	0.661075	0.716153	0.684974	0.825939		0.711102	0.708785	0.784633	0.736554	0.655513	0.728036	0.753531	0.720619	0.740193	0.756654	0.766374	0.752788	0.765654	0.76022	0.754211	0.687254	0.690351	0.79219	0.770493	0.703053	0.712873	0.670862	0.674806	0.689406
cg17747005	DEPDC2	8	69026878	0.0236062	0.044615	0.0287947	0.0320624	0.0237181	0.0456288	0.0433659	0.0286731	0.02479	0.0323165		0.0582744	0.0460441	0.0277887	0.0269156	0.0349719	0.0323748	0.0339995	0.0241449	0.0424774	0.0451517		0.202611	0.163691	0.205315	0.196674	0.117691	0.195909	0.231288	0.201323	0.113813	0.172006	0.186354	0.161429	0.171769	0.233609	0.238966	0.195122	0.183304	0.229564	0.146782	0.215339	0.254434	0.240459	0.252975	0.198304
cg17775713	TF	3	134948159	0.483372	0.501791	0.449815	0.513255	0.427597	0.534941	0.422818	0.492389	0.521281	0.415754		0.434179	0.5148	0.484831	0.395643	0.470349	0.480266	0.488236	0.414411	0.45756	0.383901		0.573669	0.549466	0.591925	0.506577	0.475204	0.502302	0.56639	0.556214	0.501096	0.594843	0.522194	0.582878	0.558612	0.528406	0.548962	0.487854	0.48381	0.519427	0.501331	0.627228	0.668695	0.521754	0.576754	0.577906
cg17880199	MYH11	16	15858341	0.0341151	0.0360638	0.0365011	0.0563481	0.0326801	0.0279666	0.0525074	0.0384212	0.0385463	0.0400465		0.05315	0.0304417	0.0390985	0.0335066	0.0274246	0.0348096	0.0289684	0.0225901	0.0419734	0.023288		0.0801792	0.065327	0.107025	0.0791951	0.0809037	0.164203	0.0680913	0.087514	0.0630309	0.0981663	0.113836	0.063929	0.0977552	0.0680025	0.0870061	0.111812	0.0748345	0.114021	0.0660735	0.152193	0.0938047	0.101858	0.113578	0.132638
cg18043195	C9orf138	9	19023231	0.955042	0.936858	0.946644	0.947457	0.932535	0.950388	0.944556	0.93827	0.917383	0.945625		0.912088	0.873012	0.922768	0.913064	0.946967	0.904786	0.939376	0.921569	0.942711	0.930416		0.719973	0.715125	0.714963	0.597363	0.531461	0.694108	0.705059	0.703794	0.67486	0.671934	0.71886	0.611209	0.659258	0.701477	0.667123	0.541924	0.653733	0.576934	0.699859	0.619131	0.643642	0.612577	0.611705	0.647966
cg18135555	PIWIL2	8	22188937	0.848834	0.902675	0.958614	0.93003	0.901762	0.891098	0.842019	0.82009	0.922459	0.939808		0.799442	0.77389	0.729128	0.855704	0.772226	0.730133	0.827681	0.913621	0.934114	0.929571		0.714668	0.767986	0.816654	0.735146	0.528096	0.784484	0.851894	0.671605	0.763914	0.807692	0.739782	0.83548	0.82118	0.893456	0.849746	0.805166	0.73817	0.80125	0.83426	0.810213	0.698538	0.840544	0.761201	0.655061
cg18153124	KCNQ3	8	133562336	0.0393977	0.0255538	0.0125412	0.0245588	0.0132247	0.0129847	0.0124502	0.0128197	0.00912049	0.0199237		0.014845	0.0184274	0.0125728	0.0134144	0.0166005	0.0176143	0.0142929	0.014074	0.016983	0.0113643		0.0733749	0.088338	0.0674869	0.0863227	0.0847524	0.080547	0.0928703	0.0776835	0.0711047	0.0709805	0.062441	0.0635311	0.0715067	0.063461	0.0731261	0.0842123	0.0698745	0.071002	0.0517828	0.038389	0.0657319	0.064045	0.0931018	0.0761619
cg18182399	DES	2	219991419	0.133069	0.308528	0.155077	0.153677	0.12497	0.276495	0.281381	0.121038	0.124229	0.181524		0.146644	0.11309	0.211397	0.167755	0.108857	0.10392	0.122248	0.124017	0.193354	0.0711486		0.212823	0.273325	0.339913	0.351889	0.315538	0.399902	0.150767	0.319344	0.331497	0.45465	0.322941	0.182653	0.422552	0.557888	0.410026	0.21779	0.216872	0.232269	0.38182	0.379991	0.437618	0.488572	0.421794	0.416602
cg18289156	FLJ37357	2	84596956	0.0399125	0.0332254	0.0432284	0.0529208	0.0183705	0.0469494	0.0910009	0.0354719	0.0319855	0.0724559		0.0405745	0.0419556	0.0447383	0.0216523	0.0249425	0.0265521	0.0532161	0.0169244	0.047317	0.018891		0.166337	0.0858764	0.127471	0.129184	0.0677948	0.134802	0.0922008	0.0779901	0.0655625	0.0828168	0.0720464	0.0648527	0.0646175	0.0768413	0.0951189	0.0494806	0.104519	0.0803359	0.0618557	0.0732394	0.131413	0.112571	0.133279	0.145095
cg18342900	LOC388272	16	45422549	0.122473	0.131998	0.154684	0.134183	0.134056	0.0747006	0.130326	0.152149	0.146499	0.138425		0.189425	0.111723	0.137032	0.129405	0.15741	0.144662	0.0977246	0.0600902	0.172158	0.0985328		0.071108	0.0596411	0.0545935	0.130065	0.052846	0.0924119	0.0335439	0.0607628	0.0589109	0.0562759	0.058688	0.0923048	0.0705484	0.0514353	0.0623578	0.0466253	0.0615459	0.055329	0.0557906	0.0611795	0.0745725	0.0607566	0.0585239	0.0659198
cg18354594	FLJ45717	1	245343270	0.81113	0.832665	0.818559	0.81585	0.84406	0.801725	0.805659	0.839422	0.826118	0.786534		0.771663	0.799393	0.760338	0.802709	0.851695	0.811398	0.829963	0.846453	0.746566	0.805729		0.873139	0.832687	0.88657	0.832725	0.853063	0.791246	0.86776	0.852274	0.856742	0.857241	0.842742	0.862136	0.855373	0.847069	0.857403	0.843728	0.826038	0.85494	0.872619	0.875358	0.837888	0.857816	0.826331	0.852893
cg18438777	NPY5R	4	164485195	0.0649655	0.125864	0.0701392	0.0855995	0.0854178	0.12886	0.0964128	0.0645482	0.0695301	0.0832408		0.101887	0.0716994	0.0981689	0.0634742	0.0591623	0.0704707	0.0527915	0.0595074	0.0864307	0.0621251		0.139139	0.13287	0.104865	0.167012	0.103467	0.177708	0.141191	0.142763	0.0982622	0.155736	0.142088	0.106926	0.0875882	0.106195	0.133429	0.0803956	0.169327	0.130308	0.120219	0.0713854	0.136654	0.115367	0.162355	0.0949824
cg18521925	SLC22A16	6	110905016	0.95628	0.941554	0.951929	0.952473	0.948327	0.960371	0.957776	0.954645	0.95397	0.944206		0.947981	0.951063	0.935496	0.959864	0.957693	0.956352	0.951245	0.950467	0.953585	0.958561		0.745663	0.661858	0.65347	0.63575	0.69977	0.723479	0.512343	0.759989	0.730175	0.804172	0.748301	0.630735	0.824972	0.819114	0.641945	0.687528	0.589037	0.659789	0.791706	0.740914	0.716261	0.682421	0.738471	0.715727
cg18604842	FLJ36046	22	20317190	0.972817	0.977587	0.967916	0.966867	0.978037	0.986575	0.973245	0.971472	0.972961	0.980805		0.969057	0.97518	0.965187	0.979874	0.97837	0.977486	0.980724	0.984096	0.977224	0.98403		0.688399	0.602038	0.801715	0.629856	0.657491	0.632289	0.688198	0.704204	0.669519	0.72941	0.737843	0.679711	0.70541	0.624819	0.588791	0.661171	0.609605	0.739546	0.713989	0.593373	0.617422	0.551956	0.544809	0.516428
cg18743730	CA4	17	55581763	0.38779	0.385753	0.46216	0.40945	0.475699	0.387674	0.471522	0.405595	0.425014	0.407076		0.430155	0.469643	0.368888	0.373342	0.392234	0.333933	0.339049	0.334382	0.403618	0.318941		0.199367	0.214949	0.247491	0.252928	0.200724	0.250135	0.297548	0.235676	0.332372	0.271362	0.191499	0.269299	0.208544	0.276842	0.252131	0.263461	0.246654	0.273404	0.25561	0.252254	0.268074	0.244166	0.322512	0.284077
cg18815943	FOXE3	1	47654901	0.0315579	0.0854089	0.0404832	0.0295689	0.0415268	0.0375584	0.0685678	0.0327383	0.0218517	0.0396765		0.0409646	0.0439064	0.0374523	0.0741045	0.0292472	0.0228035	0.0260176	0.030757	0.0713082	0.026114		0.0544901	0.0383096	0.0951322	0.0565839	0.052332	0.0629768	0.0971381	0.046785	0.0333619	0.053302	0.0514435	0.0450622	0.0437905	0.0383831	0.0587561	0.0369195	0.0553804	0.0390278	0.0456907	0.0828525	0.066769	0.0571574	0.0569533	0.0300839
cg18938204	EMILIN3	20	39428271	0.0842641	0.130166	0.106049	0.0896962	0.0989845	0.12	0.104812	0.0936385	0.0752491	0.152032		0.151897	0.106007	0.0992977	0.0950899	0.106228	0.0839666	0.0719101	0.0436659	0.207365	0.0551901		0.269651	0.267408	0.307192	0.251281	0.3	0.438216	0.151524	0.174444	0.244337	0.397093	0.31265	0.179012	0.203535	0.322824	0.243253	0.353926	0.201137	0.269599	0.274915	0.241397	0.367144	0.236025	0.31991	0.262342
cg19056418	TMC8	17	73638812	0.0858474	0.044335	0.0250855	0.0370738	0.0183708	0.0340725	0.0304325	0.0247502	0.0187834	0.0387701		0.0429378	0.0511034	0.0285925	0.0389704	0.0302641	0.0289311	0.038674	0.0128716	0.0396845	0.0308067		0.693591	0.780055	0.865273	0.639452	0.542642	0.663429	0.714837	0.749905	0.716824	0.726219	0.633993	0.687996	0.707979	0.707103	0.662699	0.690782	0.619641	0.677055	0.716839	0.718578	0.664345	0.64156	0.617043	0.606786
cg19187185	RRAGD	6	90179216	0.0552403	0.0713771	0.0508599	0.0392616	0.0453555	0.047919	0.0478589	0.0547753	0.0472752	0.0463852		0.0804057	0.0423663	0.045947	0.033636	0.0364299	0.0386539	0.0361722	0.0484419	0.0418592	0.0372934		0.170841	0.19648	0.286768	0.190357	0.180883	0.263607	0.197252	0.180748	0.19017	0.185118	0.2443	0.239313	0.176549	0.209315	0.244811	0.185795	0.18445	0.228047	0.245361	0.237093	0.21534	0.242468	0.262438	0.202008
cg19205533	RERG	12	15265254	0.40487	0.434699	0.412591	0.401394	0.435846	0.412774	0.409324	0.345745	0.411942	0.354251		0.424655	0.295278	0.4068	0.336219	0.372058	0.366374	0.377414	0.439854	0.474289	0.417292		0.218767	0.266369	0.326854	0.231637	0.253507	0.287129	0.270488	0.251202	0.225778	0.244849	0.251539	0.220412	0.228475	0.28386	0.200953	0.229442	0.188107	0.293387	0.294455	0.263832	0.266371	0.281239	0.216103	0.21667
cg19211800	MARCKS	6	114285706	0.0513637	0.0945631	0.0435554	0.0442231	0.0588743	0.0769304	0.0988756	0.0438746	0.0276652	0.0316921		0.0553614	0.0386892	0.0464062	0.0451883	0.0616291	0.0350293	0.0227128	0.0308684	0.0560306	0.0377905		0.10518	0.0684988	0.124344	0.0695622	0.0654743	0.117604	0.071599	0.208042	0.053168	0.134658	0.0696237	0.0550076	0.0970476	0.0987228	0.0677289	0.0437241	0.0591406	0.053361	0.120761	0.0451301	0.0515891	0.10747	0.0978688	0.0447789
cg19224837	GSC	14	94306368	0.0104815	0.0115321	0.0107933	0.00898246	0.0143745	0.0135706	0.0127673	0.0102302	0.00966687	0.0151783		0.0161378	0.0207502	0.0136291	0.0129644	0.0129117	0.00710771	0.0164482	0.0159973	0.012892	0.0248945		0.0604181	0.0545213	0.0560748	0.0618956	0.0617128	0.0552329	0.0854295	0.0616049	0.0556939	0.0587527	0.0713672	0.0590441	0.0548444	0.0773496	0.0874983	0.0410599	0.0801747	0.0541336	0.0869905	0.0473809	0.0981288	0.0774573	0.0938728	0.0491002
cg19242268	TCEA2	20	62159017	0.404678	0.412088	0.46535	0.50968	0.4311	0.239002	0.452021	0.407457	0.454894	0.311935		0.227504	0.42219	0.32844	0.363312	0.487227	0.401969	0.444711	0.300687	0.372761	0.18886		0.786143	0.765449	0.813288	0.724422	0.731361	0.727145	0.760805	0.691166	0.683804	0.681524	0.700052	0.674712	0.687306	0.654494	0.711395	0.79704	0.686215	0.786488	0.709204	0.731775	0.665741	0.612939	0.613727	0.64497
cg19246110	ZNF671	19	62930740	0.0211132	0.0253061	0.0257821	0.0166954	0.0195246	0.0177243	0.0198666	0.0211847	0.0233273	0.0175974		0.0220815	0.0240939	0.0269154	0.0281668	0.0226166	0.0200752	0.0183841	0.0138403	0.0218468	0.0116199		0.0772237	0.0704594	0.0825408	0.0803625	0.180757	0.0673273	0.0637709	0.0688819	0.158526	0.134009	0.0652012	0.0497899	0.0676958	0.0602229	0.0831765	0.0460811	0.060146	0.0843417	0.0568874	0.0557583	0.0659765	0.0974473	0.0691322	0.0576042
cg19258973	KRTHB3	12	51001158	0.640128	0.643474	0.678686	0.677863	0.594585	0.788157	0.711866	0.666356	0.759338	0.732985		0.641075	0.682824	0.656843	0.706465	0.733276	0.64709	0.672065	0.709175	0.706668	0.711605		0.494089	0.342944	0.446045	0.479947	0.410129	0.438358	0.452338	0.484548	0.461803	0.459775	0.560903	0.505274	0.517565	0.391586	0.343627	0.371443	0.366573	0.3781	0.480374	0.425711	0.474012	0.389797	0.373094	0.460015
cg19426827	ADSSL1	14	104262163	0.298291	0.271355	0.273493	0.280065	0.191274	0.274234	0.220049	0.254797	0.25644	0.246675		0.228065	0.189538	0.24778	0.137764	0.247111	0.233358	0.272242	0.113992	0.300396	0.14727		0.349513	0.36308	0.372958	0.366813	0.262226	0.297572	0.348933	0.411927	0.379054	0.43412	0.466566	0.491154	0.373042	0.459831	0.315022	0.33687	0.38489	0.341924	0.37977	0.344357	0.389268	0.332156	0.321301	0.313622
cg19497444	SLC22A18	11	2887370	0.909766	0.88622	0.92489	0.887605	0.91719	0.917239	0.86377	0.890185	0.905201	0.906194		0.950777	0.916021	0.915896	0.788847	0.909208	0.93245	0.874457	0.94735	0.948705	0.941893		0.68111	0.66053	0.721762	0.645397	0.648008	0.682435	0.735352	0.664475	0.656955	0.652843	0.683714	0.712674	0.620706	0.680581	0.597791	0.686226	0.64208	0.65789	0.661421	0.715511	0.743883	0.694572	0.71589	0.706107
cg19528976	FLJ39237	7	100610000	0.0526888	0.108523	0.0646067	0.0574837	0.064773	0.0422735	0.0626657	0.0498284	0.0532707	0.0569837		0.0909614	0.0507558	0.0743546	0.0585426	0.0541342	0.0467384	0.0674545	0.0446493	0.056035	0.0515885		0.171908	0.189594	0.254063	0.152612	0.187053	0.287419	0.190711	0.213695	0.193839	0.162058	0.263386	0.218777	0.281434	0.315287	0.256171	0.277564	0.180739	0.204907	0.267591	0.309307	0.222791	0.262413	0.217323	0.171662
cg19568591	FRZB	2	183439844	0.120883	0.124736	0.111455	0.139864	0.109937	0.104023	0.1263	0.111251	0.114899	0.114931		0.107967	0.113368	0.133222	0.0956972	0.124482	0.124515	0.0902426	0.0816702	0.0853269	0.0699832		0.153963	0.133792	0.155713	0.134685	0.149842	0.152579	0.118641	0.0989497	0.105315	0.113932	0.14395	0.113943	0.116607	0.121685	0.148187	0.107514	0.114297	0.122046	0.117017	0.0953245	0.152619	0.129449	0.125977	0.141639
cg19596755	CPT1A	11	68366323	0.0822181	0.0581826	0.109097	0.0818549	0.0924018	0.0503448	0.0725594	0.0580632	0.0681006	0.0594116		0.0460747	0.0446208	0.0716004	0.0608186	0.0655336	0.0464836	0.0677954	0.0326917	0.0668147	0.0446133		0.330456	0.370197	0.413832	0.327203	0.304044	0.328887	0.500273	0.430197	0.354434	0.441904	0.253454	0.398473	0.384657	0.357087	0.398059	0.432772	0.226242	0.401907	0.336718	0.451754	0.533509	0.457111	0.348273	0.496529
cg19731268	CHST3	10	73394703	0.089207	0.100907	0.0924884	0.0565099	0.0904418	0.0934455	0.0910756	0.0869966	0.052936	0.0617656		0.133698	0.0658342	0.0896661	0.0679091	0.0627165	0.0615357	0.0580575	0.0466401	0.0780196	0.0451728		0.0801078	0.133444	0.0853912	0.114395	0.0778573	0.199048	0.168138	0.0700632	0.0724526	0.18804	0.102214	0.0765455	0.0828364	0.235853	0.14414	0.167905	0.0905779	0.130111	0.0741833	0.0483918	0.0950949	0.0940085	0.156518	0.140794
cg19774122	LAMA2	6	129246315	0.0975275	0.107185	0.136983	0.124779	0.070642	0.110035	0.131291	0.0779156	0.0745711	0.109316		0.121482	0.0921605	0.106993	0.0814848	0.103871	0.087156	0.0898369	0.0964045	0.134676	0.0822324		0.194915	0.181264	0.255785	0.237084	0.165081	0.251507	0.210894	0.17992	0.204775	0.322111	0.228245	0.191993	0.206154	0.229605	0.304325	0.187894	0.251855	0.219229	0.209862	0.27305	0.293108	0.295817	0.343021	0.199797
cg19779211	KCNQ1	11	2422067	0.120533	0.142197	0.108164	0.132687	0.0920167	0.130543	0.159196	0.108247	0.0828089	0.133525		0.166473	0.179663	0.101894	0.140676	0.12825	0.113517	0.0924404	0.118182	0.104199	0.136384		0.189837	0.272373	0.213273	0.264613	0.187964	0.228649	0.306144	0.244488	0.278541	0.209415	0.280813	0.201102	0.288366	0.329061	0.261648	0.237665	0.204455	0.320599	0.277578	0.219144	0.33473	0.281545	0.265324	0.217769
cg19885761	CPLX2	5	175156252	0.0908219	0.21	0.102529	0.140914	0.153817	0.143604	0.23081	0.114787	0.135783	0.159501		0.16821	0.116811	0.148619	0.155621	0.0977284	0.105483	0.0683426	0.114053	0.14107	0.0838268		0.0932662	0.0844463	0.0719045	0.135191	0.0763661	0.126395	0.0771177	0.0790832	0.0770064	0.0972939	0.116215	0.0760181	0.105538	0.103713	0.103598	0.0686473	0.0730922	0.103588	0.10802	0.144563	0.119184	0.124725	0.0825737	0.115319
cg19912436	PALM	19	659918	0.0229179	0.0567167	0.0252481	0.0368627	0.0276367	0.0682345	0.0478454	0.109969	0.050447	0.0566901		0.0681167	0.0438283	0.0465971	0.0370495	0.0419023	0.0244467	0.0503176	0.0172871	0.15267	0.0261921		0.0740439	0.0841754	0.0553319	0.075155	0.0777853	0.217024	0.137057	0.077802	0.0713937	0.0607303	0.0751324	0.0718991	0.0588094	0.0850511	0.0882805	0.0638253	0.0700939	0.0724903	0.0588126	0.0383877	0.0955987	0.101468	0.0915694	0.0526491
cg20050826	K6IRS2	12	51281562	0.367292	0.464361	0.370165	0.270777	0.331993	0.343071	0.31133	0.326556	0.347049	0.349066		0.345411	0.243077	0.308225	0.484165	0.352828	0.455901	0.362591	0.308602	0.293083	0.266574		0.278023	0.241026	0.22764	0.301061	0.180165	0.320324	0.186303	0.371502	0.315109	0.367566	0.392327	0.313308	0.358366	0.31604	0.220978	0.294455	0.187803	0.382967	0.345546	0.339333	0.416847	0.274072	0.333038	0.38245
cg20088535	PLK4	4	129021463	0.0213184	0.022675	0.0183899	0.0113317	0.0171345	0.0126949	0.0129925	0.0141241	0.0134216	0.0103669		0.0150219	0.028222	0.0219334	0.0170601	0.0197055	0.0153531	0.022853	0.0150505	0.017266	0.0181913		0.0572931	0.0736024	0.0538149	0.110458	0.0645864	0.0729753	0.0806988	0.0555225	0.0628729	0.0675786	0.0820101	0.0485689	0.054881	0.0866906	0.0778899	0.0413859	0.0710577	0.0825467	0.0640467	0.0368408	0.0714576	0.0763038	0.0545232	0.0392743
cg20103758	SLC27A6	5	128328595	0.0776983	0.0993416	0.0721128	0.0686178	0.0867312	0.073068	0.0552277	0.0697507	0.0584761	0.0856088		0.108605	0.057121	0.0594898	0.0597484	0.0774978	0.072225	0.0449034	0.0389997	0.0655089	0.0533104		0.143198	0.169939	0.133008	0.186517	0.163021	0.168661	0.184745	0.164157	0.170945	0.139399	0.14881	0.166922	0.158101	0.136863	0.19497	0.142815	0.182697	0.152393	0.133827	0.159056	0.14588	0.136458	0.209744	0.144559
cg20113732	NELL1	11	20647756	0.0309073	0.0462509	0.0284228	0.0434489	0.0308761	0.0306481	0.0605171	0.0334465	0.0293879	0.0280369		0.0395189	0.0267066	0.0445253	0.0374614	0.0278753	0.0279519	0.0248816	0.0267024	0.0325066	0.0165987		0.11515	0.0549873	0.0749113	0.1037	0.0587647	0.155027	0.105787	0.182669	0.0817771	0.108363	0.238276	0.0584254	0.187213	0.170482	0.0690527	0.0528604	0.053291	0.0733035	0.226406	0.0616687	0.0910768	0.0748097	0.239434	0.0589348
cg20182358	MLF1	3	159771755	0.0416634	0.0902485	0.0497645	0.0552856	0.103775	0.114719	0.0896828	0.0549203	0.0662659	0.0736624		0.0712764	0.0602071	0.0669036	0.0650514	0.0593279	0.0770991	0.0402192	0.0380772	0.0806965	0.0318232		0.0424395	0.0503795	0.0325501	0.070001	0.059731	0.0707014	0.0522226	0.0696197	0.0536139	0.0857468	0.0519812	0.0461206	0.0731146	0.053757	0.054115	0.0823036	0.0551421	0.0994894	0.0811921	0.0701019	0.0991455	0.050279	0.081826	0.0452972
cg20291049	POU3F3	2	104838649	0.140619	0.153643	0.146816	0.141152	0.179149	0.169173	0.156856	0.16142	0.14577	0.176528		0.160962	0.126966	0.172746	0.211347	0.222354	0.138731	0.098593	0.126754	0.246941	0.0741025		0.265455	0.198303	0.316421	0.221985	0.104087	0.279416	0.195247	0.312225	0.171243	0.252364	0.230798	0.182999	0.311134	0.477476	0.20924	0.242626	0.247705	0.245098	0.298024	0.239317	0.261557	0.296909	0.334248	0.18532
cg20302307	NUMB	14	72995121	0.0259182	0.0283599	0.0213015	0.0282776	0.0282749	0.0228622	0.0287911	0.0253907	0.0252064	0.0252252		0.0234329	0.0278338	0.0299143	0.0278936	0.0303763	0.0269882	0.0234613	0.0194973	0.0254646	0.0219774		0.077591	0.0669799	0.0637964	0.0789649	0.0613823	0.106952	0.0957133	0.0484579	0.0617369	0.0575224	0.0796448	0.0471829	0.0616971	0.0607622	0.0819322	0.0631261	0.063772	0.0742471	0.0623207	0.0609095	0.0779802	0.0659727	0.0771863	0.0581579
cg20346726	MGC13040	11	101423613	0.0467383	0.102292	0.0631428	0.0806815	0.0903563	0.132311	0.0791687	0.0567403	0.0784957	0.0857182		0.0830885	0.111918	0.0589317	0.0551023	0.0621457	0.0785675	0.0635083	0.0593707	0.0865542	0.0517367		0.13395	0.134875	0.178989	0.14111	0.0942434	0.137955	0.138217	0.12181	0.107351	0.178308	0.113861	0.0811857	0.119067	0.156381	0.119443	0.129073	0.105043	0.108847	0.0931151	0.159687	0.148648	0.133856	0.11281	0.0705008
cg20366906	PCDH8	13	52320382	0.17906	0.23178	0.195302	0.150771	0.136109	0.188332	0.307741	0.185861	0.17418	0.154262		0.213772	0.123798	0.207952	0.210509	0.199676	0.227624	0.185485	0.18996	0.235788	0.117023		0.410906	0.377316	0.513146	0.482456	0.404083	0.501184	0.430354	0.466593	0.424898	0.500503	0.48934	0.556124	0.499765	0.628132	0.395508	0.49854	0.397405	0.508663	0.486977	0.489472	0.432111	0.555071	0.414512	0.476804
cg20395892	IRAK3	12	64869047	0.09618	0.129895	0.103562	0.110007	0.108217	0.0701157	0.102203	0.0827191	0.103287	0.091331		0.0833697	0.0729769	0.0971245	0.0992839	0.103282	0.0790595	0.0884695	0.0626317	0.0820485	0.062458		0.168906	0.272124	0.228916	0.215926	0.19677	0.201055	0.206136	0.361625	0.262379	0.39422	0.185768	0.130102	0.312897	0.175312	0.29361	0.241643	0.175116	0.230399	0.298458	0.320552	0.176152	0.183769	0.208654	0.213439
cg20723355	FBXO39	17	6620321	0.0797031	0.197897	0.0921886	0.0823988	0.166695	0.159165	0.182319	0.0775575	0.0812509	0.122714		0.136308	0.135982	0.12867	0.112503	0.0832219	0.0854307	0.0719867	0.068225	0.11749	0.0800818		0.467797	0.288202	0.437844	0.473048	0.535654	0.563094	0.380824	0.615774	0.43072	0.593328	0.532506	0.486408	0.603132	0.480109	0.620864	0.443022	0.306582	0.499451	0.57597	0.645337	0.627522	0.609722	0.621404	0.726459
cg20740029	SLC5A8	12	100127966	0.0526517	0.0982456	0.0930901	0.0593258	0.0631867	0.0908759	0.0809869	0.0764798	0.0682102	0.105558		0.101296	0.0642723	0.114493	0.0646932	0.0778705	0.0513237	0.0793904	0.0487167	0.052693	0.0473136		0.0427268	0.0529805	0.0501209	0.0685543	0.0552925	0.0443352	0.0523462	0.103193	0.04847	0.0815768	0.0618399	0.0400582	0.0874515	0.065081	0.0538019	0.038211	0.0430101	0.0426279	0.0451389	0.0531648	0.0783961	0.0636663	0.0698837	0.185169
cg20795913	MLX	17	37972356	0.663779	0.67232	0.584343	0.654453	0.571182	0.67891	0.610572	0.598164	0.621474	0.631233		0.614867	0.72755	0.623749	0.687987	0.646546	0.598005	0.574003	0.564862	0.55866	0.691551		0.346747	0.271987	0.297775	0.323767	0.33061	0.380991	0.199442	0.297046	0.304512	0.299369	0.35137	0.264561	0.311139	0.385982	0.240955	0.288284	0.302842	0.214599	0.356372	0.289132	0.288577	0.251286	0.327289	0.237623
cg20858478	B4GALNT2	17	44565275	0.027181	0.0472632	0.0319584	0.0375834	0.0354426	0.0545614	0.0376725	0.0298479	0.0252574	0.0447647		0.0355104	0.0466363	0.0326302	0.0349375	0.0394737	0.0374454	0.0464349	0.0310881	0.0363731	0.0368728		0.13354	0.123476	0.15652	0.182204	0.105557	0.11933	0.122993	0.101598	0.113318	0.129567	0.15123	0.0887746	0.103338	0.118262	0.140873	0.0913746	0.163799	0.131455	0.121579	0.156403	0.187142	0.183362	0.167303	0.0915798
cg20959866	AJAP1	1	4613868	0.0400773	0.122167	0.0401982	0.0634704	0.0429553	0.0801543	0.0924242	0.105194	0.0618687	0.0932911		0.0759226	0.138971	0.0756027	0.0839844	0.0574025	0.056661	0.0718718	0.0883131	0.0495153	0.0633075		0.197342	0.339497	0.269531	0.236356	0.236799	0.310371	0.266074	0.386447	0.315242	0.375357	0.376519	0.318553	0.371991	0.314666	0.266933	0.353702	0.193091	0.364656	0.383906	0.272097	0.289683	0.316757	0.396083	0.394452
cg21049762	TCIRG1	11	67562032	0.88937	0.915953	0.929397	0.917128	0.90608	0.923408	0.908003	0.909978	0.918565	0.92367		0.902049	0.917766	0.905137	0.923127	0.915601	0.896566	0.906347	0.909013	0.909705	0.924789		0.883194	0.876255	0.895236		0.891241	0.844256	0.874203	0.895727	0.886977	0.889335	0.906898	0.882502	0.889625	0.883243	0.875264	0.899152	0.89977	0.878366	0.868889	0.913053	0.877215	0.873869	0.864515	0.883347
cg21085768	PRSS21	16	2807089	0.779827	0.769902	0.799778	0.80447	0.727528	0.870545	0.787925	0.795145	0.788811	0.836311		0.823852	0.77105	0.706373	0.851972	0.808879	0.796731	0.833146	0.823402	0.773438	0.792326		0.400527	0.321519	0.401673	0.459826	0.420169	0.558437	0.422957	0.498064	0.4008	0.458488	0.434598	0.432626	0.47874	0.484905	0.442349	0.4	0.456682	0.394131	0.38337	0.314182	0.343577	0.352207	0.376189	0.351755
cg21091679	ELL2	5	95323898	0.0181996	0.0239873	0.0238967	0.0169903	0.0186602	0.0303408	0.027641	0.0250991	0.0186448	0.0204944		0.0436211	0.0265487	0.0163813	0.0215303	0.0315912	0.0204759	0.023301	0.11236	0.0318355	0.0283063		0.0946865	0.0751295	0.122454	0.113394	0.0807661	0.103985	0.143702	0.140257	0.118235	0.122568	0.108853	0.106667	0.097848	0.0694036	0.1193	0.0786848	0.113667	0.0911919	0.100243	0.174787	0.113962	0.107416	0.122181	0.0931525
cg21245652	MAL	2	95054778	0.169899	0.210599	0.179593	0.161344	0.167299	0.166985	0.184971	0.184881	0.168225	0.190607		0.181292	0.139258	0.19951	0.186928	0.185154	0.15203	0.186145	0.152145	0.161959	0.141354		0.397689	0.401953	0.464363	0.41643	0.352828	0.377821	0.314644	0.358351	0.375475	0.389816	0.456953	0.353138	0.455465	0.523803	0.358586	0.391547	0.347668	0.405467	0.429446	0.38009	0.401046	0.384327	0.401017	0.431529
cg21259253	PHLDA2	11	2906668	0.0231628	0.0303074	0.0220792	0.0317714	0.0262613	0.0316901	0.0324212	0.0278069	0.0204378	0.0329574		0.0319791	0.0302457	0.0317393	0.0319654	0.019094	0.0225517	0.0239627	0.0227743	0.0178781	0.0288617		0.111662	0.0720887	0.104743	0.198542	0.124951	0.219032	0.114628	0.212818	0.161914	0.0798725	0.113601	0.125492	0.141359	0.149308	0.142172	0.258658	0.111643	0.306634	0.104362	0.194762	0.150034	0.160247	0.189131	0.223541
cg21321735	KIF1A	2	241408837	0.00779385	0.0194666	0.0119803	0.00968911	0.0100872	0.00848047	0.00944743	0.0121501	0.00890985	0.0231132		0.0237157	0.0142475	0.0197323	0.0177679	0.0110821	0.00923034	0.0104461	0.0164496	0.0162461	0.0102052		0.062704	0.0985567	0.0502255	0.055463	0.0593118	0.10395	0.0484166	0.0892013	0.0468068	0.182376	0.114931	0.0543286	0.049634	0.0482319	0.0691395	0.0626058	0.0569509	0.0573337	0.0535205	0.0603863	0.0666717	0.0775604	0.0924924	0.106724
cg21426387	SNN	16	11670307	0.0141906	0.0239189	0.0134375	0.018933	0.014201	0.0173791	0.0179715	0.0182041	0.00967595	0.0316483		0.0168067	0.0192971	0.0131784	0.0230071	0.015734	0.0101087	0.0126704	0.0100952	0.0144305	0.0196795		0.0915504	0.0880231	0.115846	0.0966033	0.0707412	0.100892	0.0698526	0.100565	0.118954	0.175494	0.155297	0.0923889	0.0886703	0.115467	0.0922252	0.124388	0.0738605	0.148311	0.0709991	0.0728522	0.116718	0.110287	0.103433	0.13522
cg21432954	TRPC4	13	37341809	0.0218064	0.0523122	0.0311939	0.0257757	0.0285018	0.0482426	0.0427488	0.0244395	0.0231694	0.0404923		0.0563613	0.035037	0.0394225	0.0277813	0.0195051	0.0306981	0.0253407	0.0244692	0.0242151	0.0346762		0.0556892	0.0450432	0.0387316	0.0591647	0.0477275	0.0659031	0.0651039	0.039363	0.0486655	0.0547572	0.0550018	0.054428	0.0485139	0.0513843	0.0656117	0.0362825	0.0466294	0.0512336	0.0420345	0.0475537	0.0689594	0.0767794	0.0752667	0.0440165
cg21513553	COL6A2	21	46343065	0.0160205	0.0282033	0.0149277	0.0272205	0.00888944	0.019041	0.0192197	0.0221206	0.0111528	0.040183		0.0284495	0.039693	0.0178946	0.0155732	0.0133816	0.0110235	0.0199243	0.0159655	0.0245168	0.0111503		0.0428749	0.0456048	0.0256535	0.0402759	0.0329767	0.0564345	0.0346508	0.0602274	0.0429959	0.0460016	0.0548292	0.0373142	0.044627	0.0414754	0.0509373	0.033024	0.0455449	0.0446253	0.0392316	0.0250126	0.0565003	0.0459136	0.072004	0.0375758
cg21530453	GNAO1	16	54783847	0.0272919	0.0414918	0.0369608	0.050824	0.0464237	0.0316048	0.049916	0.0406323	0.0508408	0.0288332		0.0358325	0.0409566	0.0468336	0.049322	0.0290643	0.0315415	0.0351795	0.0329868	0.0405162	0.0344542		0.127069	0.100774	0.1059	0.150935	0.106292	0.11492	0.100737	0.0849156	0.135543	0.136751		0.0804822	0.102044	0.101816	0.119851	0.126962	0.110584	0.130064	0.10804	0.18393	0.178637	0.180766	0.150411	0.0987017
cg21530890	SOX8	16	972261	0.0323716	0.0855582	0.0403963	0.0336852	0.029163	0.0671754	0.0902276	0.0478251	0.0291683	0.0545474		0.0698935	0.0422635	0.0512481	0.0361124	0.0302763	0.0307111	0.0358303	0.0443286	0.0527941	0.0330137		0.164949	0.137198	0.0748871	0.105869	0.0829551	0.252807	0.0859934	0.257773	0.074571	0.24933	0.0908987	0.0730174	0.113977	0.200042	0.133253	0.0961554	0.0695246	0.12449	0.234754	0.288866	0.131308	0.211874	0.225904	0.304122
cg21541083	STXBP2	19	7607212	0.937767	0.924163	0.940906	0.925646	0.921866	0.959742	0.941055	0.948465	0.929234	0.942129		0.931278	0.950428	0.929744	0.932344	0.930501	0.929679	0.950292	0.948089	0.930517	0.950342		0.476897	0.511493	0.544233	0.467439	0.465092	0.565786	0.539898	0.592345	0.546237	0.59297	0.609442	0.472538	0.57748	0.648365	0.473798	0.514897	0.439365	0.48082	0.574778	0.593	0.55181	0.537778	0.549464	0.47639
cg21652958	THBS2	6	169395886	0.0901662	0.103129	0.0825985	0.121162	0.12323	0.0837331	0.0937929	0.0841484	0.111816	0.0950122		0.0952301	0.111482	0.108466	0.0916719	0.115401	0.0890411	0.0696728	0.0798236	0.112738	0.0679632		0.211162	0.21449	0.257466	0.293285	0.130964	0.282627	0.174694	0.240515	0.206716	0.328482	0.221632	0.186624	0.274445	0.322559	0.229542	0.164555	0.247742	0.21866	0.244424	0.236609	0.338583	0.301101	0.249604	0.280834
cg21660424	IPO4	14	23727941	0.0435457	0.0366818	0.0351445	0.0423338	0.0291371	0.0265551	0.0482653	0.0339401	0.0424204	0.0332501		0.0449201	0.0337359	0.0516961	0.0459639	0.0323676	0.0305165	0.0385795	0.032052	0.0410149	0.0294243		0.108026	0.101691	0.0835194	0.0881221	0.0728767	0.0883018	0.0649567	0.0676061	0.0775365	0.065745	0.0648327	0.0548507	0.0785042	0.0681839	0.0831962	0.0655401	0.0747116	0.0624403	0.0749415	0.073186	0.0850502	0.0766281	0.0685589	0.081572
cg21672276	ZNF502	3	44729076	0.0666276	0.195989	0.142513	0.0957268	0.0862084	0.0671288	0.144924	0.116873	0.0966805	0.0915211		0.115244	0.0619786	0.124505	0.121355	0.0820185	0.0791019	0.11693	0.0723014	0.106761	0.0781189		0.143549	0.138593	0.0943171	0.118031	0.0939056	0.209943	0.167601	0.100958	0.108044	0.137158	0.106915	0.109565	0.117333	0.252335	0.172832	0.222991	0.154015	0.286894	0.112024	0.210971	0.222856	0.213801	0.163536	0.185025
cg21762589	BNIP3	10	133646466	0.424835	0.491067	0.53897	0.52844	0.618477	0.553052	0.496873	0.41163	0.506117	0.561585		0.502655	0.466569	0.453181	0.526376	0.476681	0.369397	0.459261	0.463768	0.409286	0.740314		0.405023	0.369889	0.292517	0.362859	0.306131	0.337784	0.456576	0.347445	0.335437	0.48668	0.436818	0.319558	0.316548	0.38348	0.3987	0.306385	0.324081	0.314933	0.356076	0.344465	0.420525	0.377661	0.326164	0.272279
cg21820677	GABRA2	4	46087285	0.0290252	0.0557981	0.0412189	0.0365148	0.0286458	0.031319	0.073576	0.0352432	0.0242386	0.0355045		0.0583425	0.0329732	0.0562799	0.0412154	0.0305212	0.0196662	0.0288864	0.022792	0.0495157	0.0823171		0.159527	0.141885	0.176051	0.144255	0.0715724	0.258553	0.202182	0.2193	0.223315	0.267987	0.241269	0.09415	0.277534	0.311938	0.163761	0.220127	0.120354	0.280428	0.27924	0.192061	0.125986	0.222989	0.173939	0.141594
cg21833459	FAM111B	11	58630531	0.0442798	0.111991	0.0413894	0.0412779	0.0419131	0.0521127	0.0585865	0.03956	0.0319868	0.0337681		0.0370771	0.0316516	0.033574	0.0494413	0.0392975	0.0569869	0.0290987	0.0183393	0.0400987	0.0260485		0.116917	0.142612	0.0990504	0.0987697	0.0941099	0.195693	0.229481	0.255028	0.116149	0.128365	0.0938772	0.115055	0.169589	0.168588	0.184202	0.170189	0.12927	0.188453	0.176959	0.168905	0.178441	0.239016	0.119063	0.256378
cg21870884	GPR25	1	199109052	0.29886	0.449572	0.365776	0.18004	0.414734	0.559601	0.323666	0.237211	0.242272	0.295951		0.440588	0.344238	0.317218	0.357422	0.308358	0.266421	0.189183	0.364772	0.279973	0.307939		0.50193	0.519272	0.605534	0.467988	0.592607	0.615377	0.555126	0.671331	0.628297	0.684989	0.641226	0.524289	0.664504	0.655577	0.577294	0.66888	0.5012	0.691792	0.685777	0.69442	0.713224	0.748933	0.709037	0.708589
cg21965997	DRD1IP	10	135000357	0.0240941	0.0316674	0.0378505	0.0248436	0.0166006	0.0178788	0.0304506	0.0240318	0.0219989	0.0188466		0.0199005	0.0159341	0.0257182	0.0225589	0.0208287	0.030763	0.0229195	0.0131784	0.0297616	0.0191725		0.0645301	0.121542	0.0825638	0.0970839	0.0951798	0.0915245	0.0744681	0.102247	0.106109	0.0886031	0.066251	0.0623614	0.0961496	0.072945	0.0704752	0.0703403	0.0682315	0.0619151	0.0781813	0.0733261	0.0885109	0.131838	0.0772695	0.0756369
cg22009923	CD151	11	822065	0.789981	0.793827	0.820451	0.780518	0.814461	0.812537	0.804858	0.84709	0.825938	0.81443		0.738275	0.763133	0.83559	0.80763	0.786739	0.810333	0.809381	0.802811	0.775764	0.86975		0.627318	0.670919	0.658477	0.621156	0.657722	0.620665	0.708871	0.701733	0.56616	0.655566	0.693776	0.668311	0.637499	0.718855	0.679234	0.646083	0.640697	0.656502	0.684231	0.663295	0.670939	0.671076	0.649251	0.669994
cg22085335	KCNF1	2	10969532	0.0129109	0.0309706	0.0205878	0.018192	0.0192591	0.0189341	0.0323571	0.0168575	0.0171699	0.0219675		0.0651062	0.0250752	0.0239644	0.0373701	0.0169118	0.0174467	0.0286156	0.026358	0.0228763	0.0240893		0.0462313	0.0423286	0.0414988	0.0559033	0.0522516	0.0707253	0.0387069	0.0637956	0.050912	0.0671686	0.0379857	0.0438512	0.0433181	0.0581955	0.0541438	0.031714	0.0347941	0.0448377	0.0480945	0.0447789	0.107347	0.0871855	0.0551102	0.063557
cg22129364	GPX7	1	52840482	0.0421358	0.0336524	0.0524648	0.0304519	0.0283657	0.0598664	0.0418817	0.0525081	0.0342739	0.0349336		0.0466614	0.036485	0.0353893	0.0414489	0.0394596	0.043327	0.0381298	0.0316305	0.0325234	0.0254864		0.212582	0.216393	0.199709	0.153896	0.178801	0.359736	0.199882	0.415718	0.258265	0.497081	0.264823	0.196712	0.236885	0.298308	0.326016	0.216101	0.250909	0.212008	0.259009	0.282248	0.428819	0.291558	0.303216	0.108807
cg22134325	NPAS4	11	65945321	0.245269	0.35938	0.449785	0.311611	0.289796	0.314276	0.303758	0.286776	0.256382	0.332131		0.370562	0.235086	0.337068	0.200882	0.151136	0.264666	0.263441	0.163908	0.356792	0.266512		0.485909	0.461573	0.425455	0.456877	0.39264	0.529772	0.708777	0.538988	0.449227	0.543433	0.50743	0.518195	0.510097	0.616142	0.470218	0.568321	0.445436	0.585962	0.529179	0.491914	0.48009	0.568833	0.541565	0.500759
cg22171829	PDK4	7	95063456	0.421164	0.396124	0.351208	0.381424	0.496953	0.313406	0.287304	0.234255	0.388482	0.234998		0.350628	0.196784	0.294513	0.281754	0.42526	0.259753	0.32466	0.311221	0.326113	0.317043		0.0783643	0.0750896	0.0797089	0.109468	0.0841751	0.130245	0.0646122	0.231196	0.0952584	0.093374	0.117493	0.0784836	0.0866288	0.0854048	0.0714226	0.0654247	0.0759313	0.0806987	0.0806299	0.2078	0.121107	0.125069	0.193238	0.0720881
cg22227689	SCPEP1	17	52410538	0.0216047	0.0384763	0.0314706	0.0197134	0.030823	0.0151616	0.0319564	0.041929	0.0196462	0.0307017		0.0491243	0.0333952	0.0270067	0.0258962	0.0239653	0.0165516	0.0197017	0.0144219	0.0365686	0.0275452		0.0727822	0.0929686	0.0662224	0.0957222	0.0794061	0.0977303	0.127669	0.0615915	0.0791209	0.0669301	0.0833981	0.055142	0.0516873	0.0686394	0.0884652	0.056678	0.0750678	0.0732006	0.0603839	0.0467057	0.0905249	0.0960854	0.0713603	0.0935377
cg22303211	SOX1	13	111770172	0.222687	0.332642	0.225164	0.266423	0.195498	0.250707	0.305661	0.254016	0.254247	0.258343		0.310034	0.218353	0.267683	0.289333	0.26093	0.244012	0.191297	0.176723	0.285227	0.180545		0.424233	0.379394	0.494608	0.410013	0.364415	0.424726	0.542653	0.511272	0.409047	0.47961	0.497246	0.423194	0.48938	0.45742	0.384173	0.396621	0.365928	0.44021	0.515876	0.49561	0.479652	0.465055	0.510599	0.447385
cg22341310	ZNF541	19	52740395	0.195907	0.333849	0.182685	0.269873	0.190339	0.251002	0.217216	0.178128	0.238868	0.280431		0.219086	0.306825	0.15349	0.132286	0.126911	0.0624253	0.201744	0.218328	0.0998341	0.511962		0.655773	0.563775	0.593239	0.592896	0.500448	0.555884	0.495624	0.515807	0.554421	0.548277	0.674115	0.509903	0.55031	0.613023	0.614032	0.601295	0.523438	0.648135	0.623895	0.410128	0.518311	0.586549	0.525843	0.516675
cg22396755	RAP1GA1	1	21867684	0.056872	0.0809498	0.103448	0.079679	0.114517	0.0778169	0.0881894	0.095188	0.0479363	0.0905031		0.121373	0.114349	0.0726487	0.0600164	0.0975529	0.133094	0.0641675	0.0515243	0.0549147	0.0668992		0.279777	0.283331	0.256135	0.330313	0.235468	0.319011	0.293656	0.290761	0.372772	0.53842	0.475163	0.402473	0.431469	0.436036	0.283469	0.297542	0.25511	0.343463	0.377418	0.374204	0.317191	0.41116	0.375167	0.291589
cg22449114	TCF15	20	538243	0.435587	0.418574	0.193597	0.289135	0.41346	0.310658	0.319392	0.322075	0.233508	0.231772		0.351339	0.239046	0.378401	0.320763	0.286546	0.293488	0.329583	0.248846	0.494462	0.246566		0.315034	0.313914	0.382588	0.245204	0.266367	0.337617	0.463911	0.374409	0.348745	0.378298	0.318576	0.349771	0.412557	0.367288	0.36379	0.319553	0.217622	0.339432	0.485018	0.346869	0.318841	0.408074	0.308445	0.332209
cg22490255	TSPAN31	12	56425216	0.0678643	0.0679961	0.0597933	0.036016	0.0571561	0.0421067	0.0813104	0.0688698	0.0497382	0.0414302		0.065399	0.0741434	0.0770987	0.0607404	0.0430395	0.0597051	0.0591329	0.0541349	0.0772443	0.0439511		0.064198	0.118127	0.0711805	0.110084	0.143163	0.107451	0.0965143	0.117091	0.0795965	0.139196	0.0878641	0.0905211	0.15789	0.103348	0.106519	0.0577312	0.0968884	0.10218	0.135852	0.0555748	0.109765	0.130963	0.117361	0.157681
cg22496652	SEMA4D	9	91284445	0.704155	0.59119	0.635056	0.609319	0.687396	0.679859	0.57515	0.605715	0.599033	0.684189		0.652551	0.64543	0.655522	0.712197	0.607542	0.674634	0.649883	0.629753	0.674747	0.667951		0.64321	0.632647	0.700849	0.641562	0.611587	0.665588	0.677207	0.669056	0.697223	0.661193	0.662965	0.682899	0.675891	0.639882	0.644153	0.639144	0.621938	0.661676	0.654851	0.680621	0.672075	0.641947	0.62113	0.659002
cg22496683	MGC27016	4	155922060	0.752722	0.564231	0.895765	0.660249	0.648244	0.837568	0.740052	0.647857	0.840091	0.693323		0.674183	0.747087	0.680892	0.540879	0.615011	0.589492	0.791409	0.756823	0.631238	0.321266		0.433522	0.490829	0.544449	0.50523	0.359564	0.581966	0.579674	0.56367	0.47481	0.63276	0.57495	0.351616	0.596667	0.541921	0.622633	0.46988	0.376194	0.53816	0.576829	0.568308	0.47783	0.561567	0.466731	0.495737
cg22524514	CST6	11	65536252	0.230008	0.274566	0.27751	0.249847	0.181078	0.278354	0.27895	0.270355	0.332324	0.309509		0.237412	0.157783	0.248887	0.210116	0.244908	0.233428	0.213753	0.181926	0.310084	0.113894		0.435432	0.449113	0.490196	0.42525	0.399082	0.582183	0.697914	0.551471	0.457545	0.481036	0.470901	0.445345	0.378353	0.478509	0.464875	0.551015	0.322211	0.563178	0.420416	0.441603	0.550169	0.419044	0.423617	0.346418
cg22593486	OR10H1	19	15779609	0.985353	0.984564	0.982139	0.987428	0.985731	0.987298	0.982019	0.984467	0.983471	0.983242		0.979644	0.981926	0.981972	0.981084	0.984672	0.981196	0.984935	0.986059	0.985473	0.987646		0.76273	0.70599	0.784493	0.769874	0.799762	0.818263	0.85691	0.806269	0.831419	0.775694	0.807632	0.738778	0.82776	0.76109	0.736193	0.805871	0.774642	0.814299	0.809856	0.74829	0.708552	0.728009	0.747831	0.775709
cg22774127	COX10	17	13913653	0.0180875	0.0229153	0.0449515	0.0465441	0.0239186	0.0175726	0.0272322	0.02226	0.0166276	0.0214448		0.0222871	0.0183659	0.025735	0.0192277	0.0318174	0.0209733	0.017774	0.0154746	0.0209599	0.0125205		0.079497	0.0719872	0.0678321	0.0891799	0.0708333	0.0736686	0.0532613	0.0510561	0.053936	0.0710793	0.0663944	0.0605167	0.0713182	0.0611593	0.0743044	0.0543334	0.0661072	0.0679097	0.048464	0.0444191	0.0915169	0.0656755	0.0817121	0.0791115
cg22833027	CHRD	3	185581484	0.027049	0.0193165	0.0220656	0.0130562	0.0135021	0.0399369	0.0174665	0.0243177	0.0164926	0.0208108		0.042517	0.0377698	0.0171109	0.0193662	0.0208243	0.0186816	0.0218762	0.0233536	0.0200677	0.0327869		0.134692	0.129596	0.16515	0.164654	0.165898	0.150558	0.248493	0.15324	0.102235	0.187458	0.125803	0.110995	0.174149	0.150453	0.174037	0.130442	0.129299	0.192671	0.135276	0.14	0.251395	0.160721	0.191301	0.173693
cg22957381	KCND3	1	112333601	0.0121819	0.0204913	0.0142605	0.0162029	0.0108647	0.0360239	0.0226278	0.0120224	0.01333	0.0155486		0.0212169	0.0311319	0.0134249	0.0143895	0.0152097	0.0137697	0.0111345	0.0132943	0.0318665	0.0115427		0.157436	0.126728	0.203761	0.13643	0.109893	0.184661	0.14962	0.323582	0.157355	0.40556	0.147114	0.13019	0.28854	0.403973	0.110169	0.130298	0.130747	0.131381	0.261245	0.1492	0.155552	0.151963	0.13144	0.261896
cg23037403	ZNF454	5	178300789	0.115846	0.166965	0.149433	0.152439	0.128193	0.200356	0.20814	0.133986	0.135043	0.133403		0.205987	0.0978713	0.154623	0.180095	0.100049	0.14893	0.0912236	0.128848	0.176834	0.120564		0.0841584	0.0922092	0.117815	0.110259	0.162402	0.18987	0.0767606	0.143546	0.144774	0.108627	0.135225	0.0929904	0.171915	0.0986239	0.0677644	0.0640449	0.0801856	0.0864786	0.232628	0.0448519	0.0888741	0.0986408	0.0809923	0.16129
cg23113963	SCNN1B	16	23220794	0.0573152	0.091982	0.0815851	0.0659472	0.0878431	0.106283	0.108341	0.0895392	0.079264	0.0933226		0.0829178	0.0692026	0.069942	0.0787594	0.0448841	0.0828903	0.0786591	0.0455731	0.0694034	0.111891		0.196366	0.20992	0.22576	0.261311	0.202314	0.232689	0.267857	0.175682	0.243583	0.194328	0.216867	0.221288	0.218881	0.214737	0.241563	0.162371	0.245305	0.262565	0.241828	0.265385	0.262226	0.249032	0.308511	0.247671
cg23154272	LENEP	1	153232692	0.88181	0.875032	0.913774	0.90243	0.920551	0.91158	0.899735	0.890304	0.908254	0.88316		0.901544	0.891742	0.881022	0.891529	0.916297	0.89125	0.924506	0.909153	0.898482	0.911581		0.45779	0.566561	0.577101	0.464796	0.491097	0.47659	0.487915	0.452737	0.467436	0.53838	0.543944	0.444428	0.490944	0.474828	0.44094	0.495626	0.389725	0.499035	0.480114	0.463312	0.504704	0.541765	0.462659	0.428323
cg23239444	PACSIN1	6	34541298	0.503915	0.530384	0.4503	0.489851	0.455656	0.409112	0.441782	0.511895	0.454835	0.400689		0.44084	0.312769	0.373435	0.394151	0.377182	0.452425	0.374684	0.34411	0.442156	0.507631		0.379226	0.421581	0.404798	0.376465	0.405558	0.378111	0.423995	0.394649	0.373797	0.411948	0.375314	0.449948	0.314266	0.436593	0.493031	0.412441	0.365086	0.40957	0.36802	0.377168	0.417235	0.44244	0.437877	0.322899
cg23349790	IGSF21	1	18307163	0.035964	0.160558	0.044495	0.14329	0.0638593	0.140625	0.305146	0.096291	0.0629731	0.193775		0.113434	0.0900735	0.228408	0.0951134	0.061244	0.0319072	0.0630358	0.0842533	0.249581	0.0510996		0.108743	0.107559	0.0833157	0.0947917	0.109689	0.138904	0.138594	0.121706	0.0966722	0.126214	0.120286	0.0931057	0.184861	0.127722	0.161349	0.0853542	0.106124	0.0928144	0.216119	0.170839	0.0959177	0.0974376	0.170105	0.162798
cg23490074	C19orf2	19	35124864	0.122658	0.14699	0.235762	0.162243	0.155665	0.166292	0.172759	0.223874	0.178346	0.169127		0.18105	0.144184	0.165202	0.140927	0.141232	0.160231	0.133718	0.175595	0.19361	0.166856		0.249168	0.189476	0.178066	0.297468	0.174942	0.247091	0.216337	0.253761	0.186169	0.199293	0.227023	0.196694	0.156515	0.206705	0.21994	0.148754	0.191573	0.259259	0.186208	0.231644	0.305229	0.255504	0.283175	0.293238
cg23548479	CDKN1C	11	2863255	0.0277814	0.0306495	0.0355602	0.0345259	0.0253469	0.0290554	0.0432639	0.0268047	0.0190048	0.0321411		0.0291758	0.0284511	0.0419588	0.0386395	0.0215676	0.0278773	0.0230611	0.0281917	0.0332643	0.019498		0.133253	0.0649652	0.140862	0.150085	0.079431	0.177288	0.118372	0.284146	0.204376	0.143748	0.111492	0.0887846	0.168345	0.249805	0.0982267	0.262674	0.0944191	0.258761	0.217311	0.266575	0.140718	0.108094	0.317962	0.123275
cg23606023	CBFA2T3	16	87570449	0.167009	0.30551	0.17789	0.133168	0.179587	0.234545	0.19246	0.257633	0.146106	0.191985		0.278953	0.176655	0.208089	0.18259	0.235384	0.147796	0.0937153	0.0989543	0.0972455	0.160311		0.605232	0.57033	0.637159	0.622603	0.532671	0.64906	0.647255	0.626976	0.613968	0.644998	0.609416	0.670716	0.665825	0.651416	0.590527	0.538561	0.662617	0.576774	0.678398	0.592234	0.613753	0.579635	0.588987	0.621518
cg23625458	AFAR3	1	19472728	0.976789	0.968124	0.977917	0.97215	0.968641	0.982084	0.968436	0.960252	0.974265	0.981664		0.974131	0.972714	0.963101	0.967288	0.964942	0.975132	0.979153	0.983757	0.977735	0.986679		0.846445	0.896692	0.884162	0.862735	0.845614	0.8354	0.939954	0.874173	0.856172	0.859168	0.879102	0.879169	0.877383	0.88456	0.80756	0.822487	0.816277	0.829458	0.879529	0.862509	0.896252	0.889309	0.874277	0.851404
cg23722792	SCN4A	17	59404200	0.963266	0.965722	0.95957	0.965218	0.962896	0.970068	0.970892	0.966758	0.976259	0.97451		0.946645	0.964458	0.961363	0.963417	0.974982	0.971092	0.972405	0.970272	0.97075	0.965148		0.806725	0.669127	0.760857	0.788593	0.601412	0.760529	0.680707	0.771936	0.797558	0.803893	0.776495	0.738357	0.828338	0.813212	0.776574	0.711359	0.677569	0.767049	0.830081	0.677949	0.643318	0.691121	0.657842	0.77261
cg23824815	ZNF333	19	14661772	0.0200352	0.0176523	0.0217718	0.0188422	0.0155931	0.0181743	0.0260473	0.0165666	0.0155321	0.0117859		0.017697	0.034567	0.0162462	0.0131728	0.0103784	0.0160363	0.0390909	0.0416373	0.0166253	0.0245933		0.0774312	0.0496932	0.074341	0.0828523	0.0559109	0.0627762	0.0986014	0.0661263	0.0817294	0.0789054	0.0802591	0.0745663	0.0575221	0.0726709	0.0734803	0.0576923	0.0835369	0.0861006	0.0610774	0.0482871	0.10502	0.0762496	0.0656182	0.0774373
cg23827867	SOX12	20	254044	0.0174117	0.0193358	0.0196112	0.0203112	0.0215971	0.0551374	0.0239266	0.0453523	0.0183562	0.0190619		0.0217075	0.0179517	0.0259512	0.0185726	0.0213719	0.0205171	0.0166992	0.0143628	0.0234777	0.0135887		0.0578664	0.0689701	0.053042	0.0754077	0.0672943	0.0769356	0.0631516	0.0611959	0.0723094	0.057447	0.0539933	0.051049	0.0513422	0.0580387	0.0757104	0.0491981	0.0493414	0.0593464	0.0616383	0.0409941	0.0624201	0.0680173	0.057016	0.0693419
cg23968383	ZNF572	8	126054108	0.870816	0.885057	0.862647	0.91551	0.885419	0.925532	0.856205	0.90206	0.885023	0.889827		0.835338	0.923623	0.851599	0.8913	0.846548	0.854965	0.868474	0.936864	0.877275	0.907033		0.447711	0.444157	0.453066	0.309762	0.456585	0.426997	0.384495	0.389168	0.40341	0.468652	0.516717	0.384735	0.357525	0.3888	0.375983	0.3051	0.427928	0.332496	0.406397	0.31973	0.440208	0.353686	0.350221	0.29537
cg24010952	BDKRB2	14	95740615	0.230519	0.302626	0.397152	0.306131	0.433227	0.377167	0.291325	0.381601	0.361365	0.367481		0.285513	0.276379	0.316649	0.165144	0.382082	0.26701	0.321112	0.280637	0.377243	0.170692		0.285677	0.2711	0.274559	0.27574	0.254905	0.29711	0.278375	0.293809	0.272334	0.253582	0.284367	0.223282	0.285544	0.340718	0.265814	0.271806	0.187721	0.321237	0.298686	0.200917	0.299475	0.278552	0.266097	0.280869
cg24019851	SEMA3B	3	50289295	0.590335	0.66089	0.731389	0.537907	0.490809	0.646455	0.674948	0.62371	0.538113	0.639518		0.577778	0.538602	0.477372	0.801253	0.486384	0.596575	0.548852	0.695914	0.52111	0.810041		0.543896	0.582019	0.575186	0.537916	0.46995	0.5747	0.552221	0.57833	0.546742	0.563895	0.618922	0.494408	0.626983	0.660241	0.417284	0.51656	0.464347	0.457896	0.648082	0.487856	0.569922	0.449376	0.646933	0.544762
cg24236938	EGFL9	6	43532169	0.682601	0.51651	0.569262	0.545749	0.581356	0.600184	0.575504	0.57124	0.505837	0.604456		0.495279	0.560855	0.593377	0.695231	0.550104	0.613996	0.598773	0.602625	0.528122	0.464949		0.512052	0.491226	0.427907	0.515502	0.443748	0.477708	0.486546	0.436001	0.477674	0.461847	0.452415	0.426843	0.568167	0.505592	0.472091	0.491912	0.43521	0.513602	0.558328	0.602366	0.46014	0.4231	0.495567	0.602836
cg24238205	FAM111A	11	58668750	0.0233404	0.0168911	0.0252453	0.0254657	0.0188049	0.0130856	0.018403	0.02149	0.0115346	0.0276514		0.0258221	0.113114	0.0149163	0.0125614	0.0132743	0.0160453	0.0165406	0.0166765	0.0194314	0.0155492		0.409328	0.548022	0.591468	0.380707	0.439204	0.526719	0.456522	0.56276	0.582254	0.565765	0.575239	0.509465	0.536533	0.523061	0.485763	0.461348	0.34078	0.508729	0.501529	0.615098	0.612596	0.584621	0.455071	0.45348
cg24309555	APOB	2	21120461	0.591919	0.649386	0.548798	0.330599	0.395996	0.477897	0.574533	0.617955	0.686429	0.573142		0.573421	0.53053	0.412887	0.71104	0.359731	0.354265	0.338229	0.368355	0.398864	0.185024		0.383659	0.348161	0.517386	0.397502	0.312145	0.468454	0.423685	0.542819	0.423695	0.470523	0.476319	0.41497	0.446505	0.509705	0.583689	0.393424	0.360515	0.434109	0.472735	0.347279	0.39657	0.42345	0.36181	0.492764
cg24329717	P2RX3	11	56862669	0.96451	0.969116	0.960153	0.959709	0.954315	0.978359	0.961434	0.965886	0.965921	0.962633		0.959168	0.955972	0.95975	0.950357	0.965438	0.971696	0.968159	0.963201	0.971372	0.973498		0.806941	0.773299	0.834283	0.834166	0.727545	0.850326	0.763148	0.785425	0.803088	0.78619	0.834591	0.781655	0.838828	0.83868	0.770361	0.749192	0.793451	0.768791	0.82383	0.816629	0.81021	0.742689	0.779623	0.810616
cg24396745	HCN4	15	71447667	0.0448124	0.115427	0.0777724	0.107459	0.0879584	0.194818	0.188629	0.17832	0.0995876	0.233743		0.135745	0.0612844	0.156444	0.0611126	0.038108	0.0539227	0.0975234	0.0430287	0.230528	0.0605588		0.220635	0.142162	0.293836	0.129451	0.0838202	0.21122	0.172137	0.248212	0.106178	0.207863	0.210036	0.170562	0.19712	0.214448	0.124561	0.108849	0.0874907	0.116679	0.158924	0.246045	0.493716	0.194049	0.26017	0.143967
cg24623271	ZIC2	13	99433003	0.062685	0.103824	0.0997211	0.069575	0.0831199	0.071705	0.103562	0.110363	0.0704455	0.0879837		0.105109	0.127994	0.0948961	0.100461	0.0793095	0.0578501	0.0702904	0.0408856	0.0776363	0.0631368		0.227375	0.234453	0.264135	0.185349	0.276973	0.316702	0.276492	0.285217	0.288355	0.389024	0.293937	0.304154	0.300178	0.27023	0.201508	0.422116	0.205496	0.420818	0.244757	0.298283	0.217959	0.298359	0.262739	0.289984
cg24623694	PRX	19	45611600	0.0259389	0.0448061	0.0275263	0.0327098	0.0224639	0.0208145	0.0430331	0.0283925	0.0315842	0.0384085		0.0405548	0.0298286	0.0493489	0.0327546	0.0362271	0.0254784	0.0213287	0.0195456	0.0259557	0.0260223		0.424893	0.459821	0.457289	0.340132	0.412573	0.463382	0.554386	0.435097	0.427209	0.434896	0.52768	0.412816	0.433282	0.338911	0.480829	0.4936	0.367913	0.480741	0.430984	0.421913	0.430507	0.501102	0.451008	0.422497
cg24641352	ZFP41	8	144399453	0.344995	0.499494	0.27952	0.365543	0.2913	0.328704	0.281913	0.305684	0.291153	0.348634		0.35835	0.195946	0.309635	0.298116	0.387966	0.270494	0.242358	0.268822	0.334846	0.157028		0.146331	0.118605	0.128832	0.181179	0.116496	0.131177	0.158962	0.115185	0.110411	0.157308	0.164899	0.153246	0.137342	0.140323	0.174567	0.126296	0.134857	0.162167	0.136035	0.128871	0.181893	0.180236	0.16716	0.0847003
cg24687051	KCNQ5	6	73388794	0.0219824	0.0310119	0.0266456	0.01652	0.0257932	0.0189984	0.0276502	0.0222999	0.0218435	0.0232984		0.0294021	0.0286508	0.0171414	0.0258398	0.0263035	0.0200113	0.0194871	0.0208968	0.0285344	0.0162576		0.0727856	0.298392	0.0658611	0.146508	0.100879	0.114	0.0921567	0.140342	0.0906725	0.274695	0.096019	0.0875233	0.258618	0.160769	0.102927	0.050631	0.249772	0.0727882	0.252811	0.0906593	0.211188	0.10991	0.0944103	0.124438
cg24697184	TTC22	1	55039166	0.0562936	0.110518	0.11798	0.10472	0.0270727	0.0207894	0.0395089	0.0614311	0.0534926	0.0996229		0.0264905	0.0324661	0.0435498	0.0278746	0.0790017	0.0206917	0.0417314	0.0426766	0.0758143	0.017004		0.178951	0.245965	0.28766	0.161529	0.25878	0.306417	0.289831	0.398977	0.198118	0.354093	0.259354	0.255426	0.264775	0.211677	0.301584	0.220359	0.122233	0.173085	0.274612	0.330862	0.424754	0.383582	0.293793	0.264298
cg24713204	ZNF471	19	61711185	0.171427	0.371322	0.153762	0.276098	0.236786	0.462973	0.382631	0.313254	0.17294	0.356902		0.42737	0.26174	0.317761	0.297154	0.230731	0.13246	0.222585	0.302465	0.251481	0.255812		0.0658599	0.0801118	0.0813265	0.0859974	0.0833643	0.105653	0.0709045	0.060593	0.156239	0.123536	0.113746	0.0510694	0.0744385	0.0800346	0.0757293	0.0466791	0.0998916	0.049681	0.0656748	0.0633413	0.213597	0.0757294	0.096438	0.230708
cg24715245	UCHL1	4	40953551	0.0444273	0.065355	0.0618752	0.0544413	0.0338718	0.0461227	0.0878519	0.0334029	0.0259895	0.041899		0.0877458	0.113171	0.0622329	0.052199	0.0499451	0.0266592	0.0518823	0.0473293	0.0645559	0.0419847		0.0623773	0.0953273	0.113516	0.0955082	0.124969	0.167146	0.0780539	0.162468	0.0873468	0.262934	0.178556	0.10336	0.115533	0.0748864	0.135299	0.136806	0.0779221	0.138731	0.112557	0.164228	0.140528	0.111417	0.134165	0.135691
cg24800887	FANCA	16	88411489	0.917006	0.88222	0.905925	0.909864	0.873303	0.934054	0.900288	0.898475	0.904388	0.893833		0.894916	0.906812	0.894671	0.909398	0.92195	0.898617	0.912508	0.938362	0.901432	0.912288		0.57147	0.55172	0.622393	0.631063	0.644112	0.597581	0.64834	0.598442	0.447022	0.463847	0.473447	0.636138	0.716808	0.588698	0.477936	0.701798	0.52937	0.67617	0.71194	0.50711	0.670438	0.357069	0.558603	0.359466
cg24922045	GAS2L2	17	31104100	0.573092	0.495672	0.436267	0.394851	0.443585	0.405063	0.438748	0.477763	0.483883	0.42586		0.403793	0.261966	0.397431	0.33456	0.345818	0.451801	0.380411	0.312159	0.479196	0.339996		0.582027	0.643299	0.699748	0.569979	0.523827	0.61025	0.541712	0.622848	0.598317	0.583902	0.644639	0.702488	0.597517	0.511762	0.60328	0.622137	0.588377	0.634313	0.610088	0.576199	0.555482	0.543915	0.551933	0.569665
cg24975842	GNAS	20	56849616	0.521574	0.561256	0.483746	0.601889	0.554618	0.665616	0.569108	0.582466	0.59727	0.524599		0.494669	0.579377	0.523788	0.606234	0.522142	0.516108	0.558319	0.578871	0.579649	0.560272		0.529039	0.529633	0.648523	0.551662	0.593506	0.602194	0.613766	0.594209	0.560626	0.615443	0.582815	0.612973	0.553517	0.590992	0.501351	0.56955	0.581109	0.613676	0.566867	0.634484	0.552068	0.673064	0.727762	0.656445
cg25042226	PAX8	2	113753041	0.964302	0.951001	0.959986	0.9606	0.958293	0.973231	0.942506	0.966304	0.967005	0.964637		0.95908	0.949008	0.942547	0.952253	0.958392	0.94636	0.961849	0.961046	0.956007	0.961966		0.80607	0.774983	0.809961	0.768677	0.729302	0.842337	0.793924	0.849695	0.805017	0.851671	0.851849	0.78365	0.835974	0.832389	0.743149	0.692876	0.75985	0.752513	0.876562	0.75749	0.782853	0.670936	0.745594	0.772136
cg25053900	ARX	X	24943811	0.429504	0.498439	0.508306	0.391503	0.311415	0.488657	0.475012	0.423208	0.426219	0.483414		0.109593	0.100134	0.0887845	0.0848136	0.0716635	0.061584	0.0547782	0.0515885	0.0887815	0.0539474		0.274259	0.401826	0.404173	0.378927	0.356796	0.502182	0.417943	0.423445	0.401034	0.495367	0.374518	0.264365	0.471298	0.594016	0.444306	0.45491	0.294002	0.453446	0.447699	0.578007	0.490072	0.37619	0.423422	0.437917
cg25094569	WT1	11	32405345	0.0356523	0.0715426	0.0420924	0.0472455	0.0387758	0.0352353	0.071992	0.0606918	0.0370226	0.0606319		0.0666935	0.0390179	0.079868	0.0517254	0.0480659	0.038148	0.0329747	0.0294989	0.0509081	0.0377814		0.145974	0.131238	0.18487	0.119793	0.117084	0.25467	0.10404	0.165716	0.0991806	0.171874	0.203561	0.114001	0.170973	0.133596	0.111121	0.144691	0.0790496	0.172024	0.117863	0.137448	0.131175	0.121015	0.167797	0.173155
cg25228126	FZD2	17	39990836	0.0804351	0.0923514	0.0597483	0.0722035	0.0910924	0.0649306	0.112863	0.0722651	0.0650566	0.0876434		0.0591988	0.0811765	0.0628446	0.0707108	0.0616165	0.0578038	0.0471714	0.0487525	0.077175	0.0373918		0.130203	0.137194	0.181571	0.119216	0.0984978	0.167122	0.111754	0.170589	0.111296	0.245299	0.1083	0.111619	0.111064	0.126403	0.108213	0.0852542	0.0905946	0.110429	0.13205	0.0794296	0.10313	0.118	0.100873	0.0926753
cg25361106	TLX2	2	74594254	0.0480587	0.0512905	0.0585888	0.041224	0.0517783	0.0514007	0.0753221	0.062834	0.0401178	0.0495471		0.0628571	0.0654957	0.0391973	0.0610484	0.0477873	0.0313556	0.0495243	0.0227781	0.0340633	0.0266228		0.0635503	0.0772635	0.088614	0.073102	0.0605144	0.0879257	0.0778638	0.081211	0.0955787	0.0908162	0.0802862	0.0655916	0.0587906	0.0726188	0.0905885	0.0932908	0.0963455	0.109107	0.0593054	0.0634736	0.115407	0.103544	0.107349	0.0967929
cg25434223	ELAVL3	19	11452491	0.125875	0.128527	0.200449	0.147221	0.142171	0.0806658	0.136164	0.116592	0.142397	0.170483		0.127976	0.151092	0.147103	0.0685513	0.170982	0.105198	0.116075	0.096418	0.132087	0.120207		0.0915793	0.0903848	0.109649	0.109408	0.0965823	0.169892	0.10328	0.1162	0.116176	0.182319	0.140601	0.0730784	0.151507	0.131276	0.154556	0.0853034	0.0903642	0.0934036	0.147136	0.106677	0.0982289	0.0967742	0.155463	0.177125
cg25580018	ADAMTSL2	9	135389629	0.0253835	0.0316771	0.0216376	0.0213726	0.0266521	0.0205974	0.0215211	0.0299675	0.02052	0.0293766		0.0347252	0.0191103	0.0230115	0.0237797	0.0291271	0.0248933	0.0174393	0.0159059	0.0221996	0.0234165		0.0793024	0.0947533	0.0802939	0.106655	0.0831138	0.0991402	0.101204	0.133587	0.137032	0.107319	0.105113	0.0639071	0.0818065	0.0674783	0.131174	0.150465	0.0841198	0.19112	0.079921	0.0935359	0.100653	0.140667	0.129669	0.228127
cg25753817	INPP1	2	190916477	0.0439761	0.0494533	0.0457312	0.0403279	0.0441989	0.0279694	0.0640088	0.0533233	0.0449124	0.0447361		0.0399858	0.0618656	0.0557782	0.0346742	0.0614119	0.0543501	0.033993	0.0228277	0.0346634	0.0419514		0.150622	0.255709	0.215166	0.16487	0.171307	0.218898	0.172397	0.228264	0.17484	0.235734	0.182563	0.24252	0.214948	0.193642	0.246617	0.146978	0.194196	0.192764	0.125215	0.216937	0.204395	0.248499	0.220813	0.149932
cg25760229	CACNA1H	16	1143596	0.0194789	0.0253182	0.0159627	0.0155632	0.0137093	0.0134938	0.0466827	0.023143	0.0254181	0.0337368		0.0326203	0.0235477	0.0282836	0.0264045	0.0139245	0.0151874	0.0151341	0.00936013	0.0338477	0.011762		0.0665056	0.10437	0.0513921	0.078369	0.0840331	0.0900309	0.0555901	0.179392	0.0532673	0.0714816	0.0772509	0.0532894	0.0532847	0.0428716	0.0741688	0.066101	0.055329	0.0891785	0.0543788	0.26396	0.0907646	0.0738884	0.0710415	0.160063
cg25807810	DKFZp434N062	2	97124544	0.0142014	0.0115085	0.0158834	0.0119522	0.0155595	0.0127177	0.0177968	0.0167818	0.0107684	0.0137824		0.0139343	0.0203919	0.0191919	0.0159332	0.0151904	0.0169796	0.0118804	0.009734	0.013151	0.0143645		0.0860809	0.11782	0.26271	0.0781051	0.0912695	0.173421	0.0902509	0.0841962	0.104221	0.270916	0.096226	0.107077	0.0848585	0.082937	0.133727	0.132882	0.125552	0.125332	0.0843401	0.147129	0.162246	0.154572	0.134808	0.100616
cg25834568	RSPO3	6	127481377	0.0741951	0.0897684	0.054547	0.0855292	0.0591303	0.0578279	0.0733696	0.0665679	0.0578922	0.0833634		0.0935121	0.0613144	0.0746759	0.0684446	0.071995	0.0765594	0.0546741	0.0545391	0.0694445	0.0457087		0.179594	0.160022	0.0810263	0.135717	0.125317	0.140434	0.16353	0.160892	0.124091	0.117137	0.125	0.110305	0.133872	0.129526	0.108873	0.140232	0.160037	0.148125	0.150393	0.160257	0.136783	0.150501	0.133579	0.116965
cg25908985	IHH	2	219633309	0.0300769	0.142998	0.0841324	0.0846522	0.0412514	0.117396	0.0771596	0.046493	0.0569813	0.0482851		0.10729	0.0890224	0.079646	0.0564841	0.0411682	0.0447036	0.0445226	0.044405	0.0585586	0.0663469		0.167517	0.175074	0.282924	0.190822	0.131159	0.533377	0.164332	0.503563	0.113516	0.454576	0.162884	0.329649	0.314901	0.211543	0.178905	0.308616	0.193743	0.240353	0.338006	0.390374	0.303617	0.455121	0.197372	0.397104
cg25935911	DBC1	9	121172082	0.225074	0.334261	0.263634	0.285067	0.212512	0.231799	0.344149	0.359017	0.261495	0.255761		0.328901	0.324825	0.266978	0.362016	0.231785	0.279694	0.222659	0.159233	0.244999	0.178937		0.34201	0.345641	0.333314	0.443528	0.420749	0.39699	0.361483	0.495908	0.409901	0.504836	0.579966	0.378898	0.475032	0.491667	0.318314	0.383548	0.434701	0.352758	0.503026	0.495043	0.528272	0.411425	0.488563	0.553206
cg25942450	TLX3	5	170668856	0.0598081	0.123515	0.0926937	0.103916	0.0695812	0.084407	0.120258	0.0837885	0.0800832	0.0947807		0.110065	0.0795551	0.133207	0.111581	0.0767797	0.0926606	0.0668936	0.0561224	0.114651	0.0414725		0.0757825	0.0769841	0.0775173	0.0900079	0.0620246	0.0879045	0.0668562	0.0901606	0.0614294	0.0710461	0.0655081	0.0693532	0.0670292	0.0612614	0.0921772	0.0671701	0.0716735	0.0701036	0.0614221	0.0502431	0.0752632	0.106929	0.0803506	0.0810053
cg25971347	FOXF1	16	85101840	0.0135946	0.0202507	0.0144568	0.0249812	0.0158252	0.0256939	0.030749	0.0249856	0.0154415	0.0227829		0.0200559	0.0191388	0.0247434	0.0186376	0.0269113	0.0203284	0.0194569	0.0210071	0.0451519	0.0302784		0.106366	0.0858821	0.081032	0.10541	0.0550347	0.0962985	0.101221	0.0896475	0.0866515	0.077864	0.0772447	0.0859832	0.0716835	0.0826237	0.0900565	0.0716259	0.0764434	0.0629139	0.0544402	0.0690932	0.0967403	0.0712682	0.128413	0.0989011
cg26025891	PSTPIP1	15	75074954	0.0239858	0.0272852	0.0202995	0.0310795	0.0260523	0.0170574	0.0342754	0.0303132	0.029561	0.0189677		0.0319567	0.0258923	0.0230821	0.0278206	0.0212232	0.0264104	0.0166102	0.0183771	0.0301949	0.0220045		0.682689	0.693164	0.682154	0.645618	0.623752	0.642188	0.721386	0.648624	0.593939	0.631913	0.67568	0.667509	0.695976	0.620527	0.727675	0.615299	0.636092	0.631091	0.601798	0.70253	0.67141	0.712178	0.686818	0.672194
cg26033710	TACR1	2	75279757	0.489499	0.533094	0.46109	0.460184	0.470094	0.512836	0.400465	0.381285	0.438431	0.397057		0.365742	0.27337	0.408185	0.299362	0.566161	0.369818	0.380431	0.354477	0.345709	0.346261		0.30464	0.267928	0.282572	0.284167	0.348123	0.366327	0.371899	0.260791	0.273986	0.334432	0.300631	0.30522	0.294561	0.344845	0.34269	0.34601	0.183732	0.409915	0.266553	0.230471	0.288599	0.336516	0.318584	0.250807
cg26045220	KIAA1324	1	109457848	0.0133022	0.0222168	0.0133274	0.018559	0.00922731	0.00698027	0.0161702	0.0154319	0.0167588	0.00881022		0.0156041	0.0148547	0.0167504	0.0146934	0.0124301	0.0177618	0.0105252	0.0108613	0.00983007	0.00415333		0.0724051	0.0636975	0.0658087	0.046622	0.0510623	0.138699	0.0408338	0.120708	0.0524619	0.0458896	0.0522632	0.0507468	0.0665986	0.0468798	0.0471761	0.0516945	0.0616586	0.0607182	0.0510357	0.0600022	0.0685764	0.0601099	0.0632392	0.0495273
cg26061555	FLJ43855	16	32803690	0.782163	0.834102	0.796106	0.808381	0.816015	0.782817	0.752143	0.774513	0.804546	0.788563		0.820626	0.830469	0.837351	0.835928	0.765108	0.83612	0.827483	0.811388	0.825195	0.852854		0.74424	0.715559	0.753158	0.765754	0.675056	0.767795	0.897825	0.779013	0.81593	0.835447	0.740841	0.83087	0.799992	0.802945	0.836841	0.803224	0.646654	0.760662	0.786133	0.764061	0.754146	0.753935	0.751216	0.775001
cg26186727	NETO1	18	68685514	0.0465624	0.12455	0.085343	0.0728488	0.0465781	0.117946	0.137988	0.0782882	0.0632558	0.096094		0.13542	0.0862654	0.134762	0.0648221	0.0646437	0.0515421	0.0629652	0.0864441	0.0985248	0.0401261		0.294402	0.368312	0.357762	0.291792	0.201376	0.368564	0.412273	0.38549	0.329055	0.372647	0.35688	0.316745	0.416786	0.328896	0.227338	0.448705	0.241309	0.451418	0.430188	0.481902	0.276846	0.3443	0.389364	0.354062
cg26189983	TNFRSF1B	1	12150287	0.0205708	0.0184153	0.0166473	0.0161232	0.026177	0.0142527	0.0332021	0.0160903	0.012603	0.0149041		0.0169735	0.0150231	0.0269062	0.0189626	0.0186556	0.0101685	0.0154106	0.011883	0.0210535	0.0154021		0.412587	0.404766	0.436378	0.389529	0.30169	0.444948	0.356844	0.529868	0.40684	0.441725	0.469277	0.433987	0.419748	0.304907	0.436272	0.423022	0.318673	0.470584	0.358652	0.409045	0.516107	0.416401	0.468871	0.432453
cg26197220	TSC22D1	13	44048229	0.0106958	0.0111264	0.0121167	0.0115562	0.00860966	0.0120798	0.0151567	0.0139841	0.0100136	0.0134992		0.0127372	0.0205313	0.00907796	0.0162102	0.0112948	0.0142826	0.0119724	0.00619817	0.0096192	0.00853316		0.077845	0.0624791	0.0587865	0.0951354	0.0727229	0.0852403	0.10899	0.0558092	0.066373	0.0629559	0.0715318	0.0762929	0.0582719	0.0715277	0.0828861	0.0488523	0.0819181	0.0907401	0.0571026	0.0556684	0.0882699	0.0890723	0.0810605	0.068894
cg26216632	C2orf27	2	132195789	0.834623	0.823279	0.848063	0.758301	0.78725	0.825369	0.746458	0.811801	0.760162	0.823737		0.792367	0.778079	0.720369	0.705294	0.761639	0.801561	0.862929	0.818619	0.813261	0.79083		0.715009	0.654336	0.702719	0.719096	0.633697	0.660275	0.558166	0.662779	0.690413	0.712412	0.754122	0.706908	0.710996	0.677547	0.66031	0.720335	0.652903	0.701309	0.683914	0.641316	0.697942	0.636973	0.661968	0.693954
cg26233253	SLC35E4	22	29362613	0.808859	0.836304	0.847866	0.760061	0.787818	0.878475	0.758243	0.816526	0.858349	0.844102		0.810327	0.856961	0.799062	0.813682	0.814412	0.825973	0.787515	0.870728	0.829079	0.766998		0.649232	0.600254	0.591925	0.63362	0.649019	0.65321	0.618008	0.641539	0.673801	0.671836	0.646167	0.654693	0.567751	0.598956	0.715134	0.689546	0.585103	0.699426	0.567798	0.666017	0.669006	0.692144	0.652272	0.703299
cg26519339	TMEM39A	3	120665443	0.0713587	0.0479125	0.0749037	0.0778249	0.0684964	0.0494982	0.0489633	0.053659	0.0611202	0.0642615		0.063457	0.0499019	0.059423	0.0669877	0.0572207	0.0609933	0.0560903	0.0563584	0.0434088	0.0352085		0.132614	0.118232	0.0952847	0.131381	0.107614	0.118259	0.133246	0.0936488	0.0965532	0.105516	0.119776	0.110752	0.0975822	0.144204	0.140716	0.0857719	0.108782	0.10597	0.11057	0.0630226	0.102748	0.0919351	0.100127	0.080503
cg26524263	KLK13	19	56260148	0.0243472	0.0429472	0.0350603	0.0260423	0.018594	0.0272608	0.05531	0.0302546	0.0177373	0.0275383		0.0431894	0.0295018	0.036079	0.0340694	0.0217668	0.0282465	0.0135323	0.0305382	0.0326553	0.0365233		0.056829	0.0549324	0.0461724	0.0542283	0.0549527	0.0533934	0.0464314	0.0570492	0.116082	0.0531589	0.0609803	0.0435933	0.0317513	0.0550037	0.0573886	0.0356404	0.0540621	0.0431593	0.0352776	0.0386135	0.0790751	0.106848	0.0479922	0.0592388
cg26588422	DHX33	17	5313576	0.534698	0.492551	0.604412	0.683393	0.597578	0.56471	0.506786	0.517713	0.561485	0.477536		0.427794	0.400887	0.474954	0.584126	0.529621	0.427872	0.548078	0.296807	0.584288	0.213847		0.338381	0.261472	0.304654	0.422383	0.368944	0.336854	0.452098	0.361626	0.287226	0.258393	0.410582	0.351515	0.308253	0.289901	0.357237	0.247401	0.334195	0.336083	0.338602	0.277241	0.288303	0.239707	0.357762	0.254586
cg26609631	GSH1	13	27264814	0.0334744	0.134263	0.0700295	0.0948598	0.0535186	0.126663	0.218825	0.0873327	0.0553239	0.187791		0.162306	0.0853829	0.128381	0.0947896	0.0416066	0.045144	0.0562991	0.0382894	0.1187	0.0638095		0.0783707	0.123073	0.0579164	0.0886131	0.0484854	0.147193	0.0928532	0.19407	0.0603408	0.215663	0.111709	0.0400147	0.0794049	0.0787621	0.0869489	0.0600406	0.0600437	0.0859273	0.0982372	0.100145	0.0831826	0.0713022	0.0897877	0.0776493
cg26687173	LOC126248	19	38314931	0.805665	0.913451	0.851055	0.864374	0.836773	0.92433	0.886804	0.882304	0.915503	0.853106		0.908429	0.856493	0.833832	0.892108	0.817225	0.832452	0.83878	0.829005	0.859338	0.870308		0.751021	0.817134	0.786236	0.727834	0.832295	0.82339	0.788105	0.75339	0.72661	0.719066	0.756207	0.794253	0.748233	0.809113	0.789913	0.794308	0.711457	0.830632	0.759289	0.692488	0.730511	0.697711	0.752061	0.714466
cg26721264	GALR1	18	73090715	0.0131231	0.035783	0.0312873	0.0329361	0.0196553	0.0216173	0.0371781	0.0232341	0.0188335	0.0527814		0.0227122	0.0345258	0.0273973	0.0151331	0.0187475	0.0122192	0.0269119	0.0148111	0.0303228	0.0248969		0.141087	0.108571	0.115889	0.142131	0.201938	0.149898	0.163402	0.212102	0.117536	0.131745	0.180542	0.106857	0.145469	0.28784	0.126839	0.073402	0.133581	0.114449	0.222915	0.183064	0.145729	0.169225	0.149294	0.155208
cg26796190	PYY	17	39438721	0.0358074	0.052854	0.0526689	0.0460078	0.0768358	0.0709037	0.100498	0.0442554	0.0495818	0.0530216		0.0490642	0.0360738	0.0612934	0.0324973	0.0301256	0.0384465	0.0289528	0.0398418	0.0876549	0.0257945		0.699236	0.577838	0.74944	0.583847	0.616757	0.630648	0.698135	0.608195	0.6459	0.693675	0.672985	0.457944	0.656468	0.58605	0.593945	0.684394	0.633756	0.743757	0.644451	0.536365	0.549237	0.687821	0.540071	0.708032
cg26820922	YIPF4	2	32356527	0.0095872	0.010803	0.0113005	0.00951711	0.0125587	0.0102006	0.0144365	0.013823	0.0103782	0.0111453		0.0167731	0.0141844	0.018514	0.0137463	0.0173073	0.0208293	0.00948402	0.00838967	0.0180868	0.00983804		0.0698569	0.0614848	0.0588235	0.0840551	0.0621715	0.061739	0.125075	0.0592079	0.0679825	0.05278	0.0637525	0.0598721	0.0632799	0.0501346	0.0725	0.0472229	0.0483538	0.0631482	0.0411699	0.0322581	0.0679391	0.05125	0.0709671	0.0535452
cg26850754	CD8B1	2	86942307	0.0792024	0.168603	0.0782321	0.0465355	0.125743	0.0994419	0.105263	0.0884604	0.0726879	0.127644		0.0938151	0.099729	0.104811	0.0725062	0.10775	0.0850192	0.0581076	0.0969529	0.0922074	0.044631		0.717471	0.64765	0.778355	0.665084	0.677764	0.753728	0.726172	0.744613	0.748828	0.759173	0.790575	0.67627	0.759561	0.746682	0.727084	0.824443	0.558723	0.84218	0.70298	0.755045	0.786462	0.842291	0.775269	0.764032
cg27222589	K6IRS4	12	51255029	0.882486	0.856452	0.852078	0.885273	0.874634	0.907604	0.867655	0.870171	0.881497	0.873897		0.832468	0.859333	0.821671	0.867027	0.88374	0.85802	0.891849	0.906767	0.896437	0.875334		0.794836	0.769906	0.78814	0.714418	0.789849	0.756312	0.781246	0.804915	0.793446	0.809939	0.812566	0.79675	0.816358	0.81398	0.734382	0.701917	0.694985	0.738622	0.831864	0.64931	0.731588	0.654907	0.641755	0.729251
cg27225570	DUSP15	20	29921928	0.00580645	0.00974257	0.00718455	0.0147671	0.00921385	0.00742624	0.0103627	0.00690323	0.0117959	0.00891993		0.0100733	0.0131796	0.00837312	0.00981469	0.00799504	0.00875695	0.0110564	0.00669929	0.0131596	0.00669061		0.0601153	0.101539	0.0587598	0.0693621	0.0470542	0.112701	0.0594927	0.0716751	0.0682575	0.0768028	0.0849235	0.0724292	0.152747	0.10083	0.0609314	0.0440771	0.0614274	0.0523745	0.124373	0.0609892	0.0779483	0.0799142	0.0703386	0.0650185
cg27234090	USP2	11	118757064	0.100126	0.152119	0.09802	0.0913285	0.0817004	0.156622	0.118454	0.0939023	0.0781479	0.108029		0.16983	0.0652568	0.098461	0.1109	0.116288	0.0795851	0.0573449	0.0517509	0.105469	0.0791276		0.240387	0.364293	0.376454	0.277759	0.194093	0.30755	0.206686	0.369093	0.31254	0.4003	0.396588	0.33383	0.263023	0.292602	0.379566	0.432128	0.380904	0.419005	0.29438	0.322004	0.388224	0.325547	0.327729	0.259905
cg27269921	MN1	22	26527091	0.0180028	0.0434545	0.0172115	0.0173806	0.0314833	0.0156937	0.0219266	0.0624703	0.0195603	0.0973299		0.0323728	0.0647787	0.0230214	0.0273564	0.0250574	0.0128973	0.0224869	0.0136726	0.0397486	0.0106599		0.0482714	0.0608069	0.0477768	0.063861	0.0544442	0.128016	0.0593722	0.0649498	0.0504723	0.103339	0.0468436	0.0392869	0.0566963	0.0894514	0.0444054	0.040059	0.0419242	0.0525387	0.0508486	0.0581764	0.0465703	0.0908335	0.0567063	0.0502092
cg27403635	KCNN2	5	113726190	0.0426973	0.145502	0.0523072	0.0849702	0.0532498	0.0950315	0.0900079	0.0541055	0.0554458	0.0709297		0.110261	0.0623939	0.0824921	0.0784607	0.0659114	0.0376729	0.0439041	0.0653153	0.0709746	0.039604		0.114273	0.104886	0.14296	0.12347	0.0834026	0.127924	0.18739	0.14481	0.113784	0.104931	0.143952	0.0982245	0.167181	0.254375	0.125853	0.130442	0.092858	0.156156	0.173179	0.122308	0.167797	0.157344	0.170489	0.116576
cg27433088	GALNT7	4	174325594	0.0630537	0.0675273	0.0628924	0.0683809	0.0598584	0.0654637	0.0608876	0.0703775	0.0659726	0.0725155		0.0833869	0.0557608	0.0509047	0.0693887	0.0659781	0.0460035	0.0612572	0.0344996	0.0453286	0.0464257		0.298175	0.247937	0.264267	0.283455	0.293354	0.249193	0.231026	0.288648	0.256937	0.205429	0.231958	0.185831	0.299688	0.271527	0.196333	0.196695	0.200651	0.245383	0.264318	0.296171	0.306536	0.277903	0.266177	0.260068
cg27567335	RAMP1	2	238432813	0.137492	0.153928	0.105565	0.150388	0.126967	0.118404	0.145248	0.139261	0.136778	0.160629		0.131831	0.117963	0.144421	0.088632	0.109377	0.14512	0.119053	0.108411	0.155623	0.108946		0.303914	0.238392	0.408854	0.242202	0.23386	0.334465	0.279947	0.340348	0.303289	0.36202	0.418884	0.300657	0.422388	0.332725	0.284246	0.362638	0.240824	0.393523	0.393906	0.401033	0.425479	0.361689	0.429946	0.348952
[truncated: 69 more columns]

## Sheet: T18Loci-peripheral blood
				avg.beta (not normalized)
				normal peripheral blood controls (female)											normal peripheral blood controls (male)											CVS samples (not normalized
TargetID	SYMBOL	CHR	MAPINFO	femal1.AVG_Beta	femal2.AVG_Beta	femal3.AVG_Beta	femal4.AVG_Beta	femal5.AVG_Beta	femal6.AVG_Beta	femal7.AVG_Beta	femal8.AVG_Beta	femal9.AVG_Beta	femal10.AVG_Beta		male1.AVG_Beta	male2.AVG_Beta	male3.AVG_Beta	male4.AVG_Beta	male5.AVG_Beta	male6.AVG_Beta	male7.AVG_Beta	male8.AVG_Beta	male9.AVG_Beta	male10.AVG_Beta		CV1.AVG_Beta	CV3.AVG_Beta	CV4.AVG_Beta	CV5.AVG_Beta	CV6.AVG_Beta	CV7.AVG_Beta	CV8.AVG_Beta	CV9.AVG_Beta	CV10.AVG_Beta	CV11.AVG_Beta	CV12.AVG_Beta	CV14.AVG_Beta	CV15.AVG_Beta	CV17.AVG_Beta	CV18.AVG_Beta	CV21.AVG_Beta	CV27.AVG_Beta	CV28.AVG_Beta	CV26.AVG_Beta	CVB4.AVG_Beta	CVB5.AVG_Beta	CVB8.AVG_Beta	CVB9.AVG_Beta	CVB10.AVG_Beta
cg01530101	KCNQ1DN	11	2847674	0.328365	0.138035	0.114841	0.160852	0.103567	0.341917	0.492621	0.19432	0.0969064	0.303623		0.188439	0.167347	0.227951	0.129451	0.0821978	0.296849	0.0528317	0.119809	0.293735	0.0530915		0.696842	0.708757	0.784704	0.706909	0.728515	0.702997	0.7281	0.759109	0.733034	0.694673	0.721155	0.774416	0.728255	0.758214	0.732646	0.704503	0.746928	0.713886	0.73411	0.748593	0.737796	0.753318	0.752872	0.770825
cg05569220	FLJ44861	17	76753468	0.709219	0.724572	0.765366	0.733221	0.787923	0.719862	0.719872	0.744926	0.802105	0.793525		0.697487	0.816087	0.769761	0.749072	0.809844	0.815938	0.769956	0.760684	0.800217	0.821624		0.575358	0.549656	0.539219	0.609374	0.508069	0.603684	0.556006	0.614128	0.560689	0.573761	0.636192	0.558605	0.612343	0.578754	0.596789	0.600741	0.434001	0.616384	0.59472	0.557461	0.645763	0.564826	0.605246	0.610724
cg09243021	CASP2	7	142695141	0.393074	0.416707	0.340465	0.397611	0.401781	0.399877	0.474817	0.302385	0.363799	0.427457		0.455282	0.440444	0.344053	0.33109	0.405382	0.409842	0.399796	0.415016	0.429935	0.444479		0.38382	0.376499	0.477888	0.381512	0.386401	0.38377	0.402977	0.436037	0.411042	0.424924	0.374825	0.40668	0.37267	0.296335	0.413052	0.512947	0.33851	0.433307	0.376409	0.381072	0.426507	0.412929	0.464576	0.332324
cg13225039	TACC3	4	1691958	0.0373567	0.0377522	0.0281575	0.0249774	0.0409134	0.016862	0.0402047	0.0791435	0.0454904	0.0390882		0.0314947	0.0596388	0.0365305	0.0300637	0.033833	0.0206811	0.0365001	0.0338676	0.0411715	0.0167294		0.15968	0.125281	0.123689	0.137846	0.144941	0.161193	0.13133	0.153289	0.137221	0.141715	0.142783	0.134783	0.145439	0.132482	0.187435	0.147641	0.167849	0.141817	0.164393	0.121583	0.131248	0.132685	0.133897	0.1084
cg14055374	MAF	16	78191911	0.0191495	0.0140266	0.0158718	0.0145949	0.012032	0.0106369	0.0214977	0.0186211	0.0147859	0.0111709		0.0164219	0.0213892	0.0143037	0.0169549	0.0110674	0.0101119	0.0171563	0.0139592	0.0139607	0.0133265		0.16403	0.104795	0.122864	0.233406	0.0481642	0.108404	0.0892442	0.144863	0.0990234	0.0997998	0.114999	0.0503243	0.0892256	0.0639916	0.0934501	0.0445434	0.0862069	0.0755212	0.0677805	0.0803638	0.0886184	0.0894427	0.100095	0.147298
cg17414107	GNAS	20	56861225	0.452925	0.542475	0.523286	0.476743	0.336981	0.5152	0.54738	0.57007	0.542564	0.553634		0.423894	0.258679	0.540527	0.642259	0.568747	0.53045	0.328452	0.506337	0.538295	0.565801		0.524625	0.522632	0.616027	0.528582	0.504481	0.528863	0.555908	0.599179	0.504477	0.518665	0.550045	0.501885	0.587428	0.575405	0.557369	0.409131	0.558126	0.430794	0.566094	0.596458	0.553849	0.564663	0.505909	0.471039
cg19211800	MARCKS	6	114285706	0.0945631	0.0435554	0.0513637	0.0442231	0.0588743	0.0769304	0.0988756	0.0438746	0.0276652	0.0316921		0.0553614	0.0386892	0.0464062	0.0451883	0.0227128	0.0308684	0.0616291	0.0350293	0.0560306	0.0377905		0.10518	0.0684988	0.124344	0.0695622	0.0654743	0.117604	0.071599	0.208042	0.053168	0.134658	0.0696237	0.0550076	0.0970476	0.0987228	0.0677289	0.0437241	0.0591406	0.053361	0.120761	0.0451301	0.0515891	0.10747	0.0978688	0.0447789
cg19738333	REEP4	8	22055568	0.0365054	0.0448607	0.0298289	0.0434633	0.0327719	0.0231393	0.0387381	0.0322534	0.0309857	0.0372104		0.0311678	0.0372666	0.0284526	0.0323741	0.0322256	0.0259229	0.0393377	0.0327439	0.0487518	0.0284132		0.0699382	0.0787503	0.06833	0.0779675	0.0644546	0.0771708	0.0652048	0.0673554	0.0676869	0.0601796	0.0768359	0.0643842	0.050615	0.0688751	0.0649075	0.0549319	0.0756853	0.0729322	0.0678766	0.0476645	0.0955046	0.0785805	0.0697137	0.0622603
cg21824213	CASC5	15	38673339	0.0296493	0.0495331	0.0105377	0.00852663	0.0755146	0.0209552	0.0163876	0.0316228	0.00945354	0.010701		0.0173242	0.00756982	0.0337007	0.00723294	0.00797357	0.00586811	0.039626	0.00913416	0.0314755	0.0209141		0.0538922	0.0504438	0.054222	0.075321	0.0575689	0.0559201	0.0851707	0.0482383	0.0565833	0.0475198	0.050986	0.05012	0.0343767	0.0462984	0.0727489	0.0464568	0.0618826	0.0529957	0.0377926	0.044212	0.0719125	0.0604138	0.0834721	0.0384496
cg23432345	HOXA7	7	27162678	0.0705608	0.0486185	0.0469229	0.0838956	0.05	0.0420933	0.0435841	0.0426015	0.0278471	0.0250522		0.0443221	0.0411014	0.0269625	0.0431373	0.0349294	0.0350076	0.0274355	0.0342318	0.0399687	0.0646357		0.0794986	0.110887	0.113884	0.110581	0.0657051	0.114891	0.0885458	0.130142	0.0816786	0.231852	0.0792492	0.08431	0.0682774	0.0699241	0.132	0.0523205	0.081802	0.091133	0.0591449	0.0732731	0.113636	0.154114	0.163821	0.104784
cg23813257	IL32	16	3055287	0.425386	0.462782	0.467984	0.472434	0.52076	0.471973	0.441471	0.383489	0.572616	0.475729		0.42368	0.487805	0.379357	0.496568	0.50681	0.470892	0.471857	0.480135	0.581527	0.469881		0.271066	0.305174	0.228588	0.305339	0.283745	0.314231	0.297811	0.394078	0.334803	0.366204	0.310189	0.353935	0.29233	0.349535	0.44102	0.334438	0.293323	0.344786	0.294152	0.340664	0.318133	0.312637	0.292265	0.254829
cg23850212	ZFP28	19	61741669	0.0627695	0.0249874	0.0225495	0.0437505	0.0460742	0.0897805	0.0755277	0.0506433	0.023387	0.091531		0.0747382	0.0339802	0.058491	0.0339741	0.0299037	0.0206233	0.0235476	0.0176418	0.0490382	0.0350905		0.0613523	0.0587793	0.0401649	0.0646894	0.0383315	0.0615226	0.0713924	0.0506	0.0468473	0.0570293	0.0425189	0.0458339	0.0504005	0.0481397	0.0630728	0.0489452	0.0595668	0.0647746	0.0407173	0.0365085	0.063956	0.0537854	0.0547933	0.0466313
cg23922708	PARD6G	18	76106171	0.0560037	0.057267	0.0367236	0.0389027	0.0391637	0.0414364	0.0391671	0.0452045	0.054837	0.0796422		0.0327231	0.0294301	0.0436657	0.040774	0.0389024	0.0433548	0.0463785	0.0383631	0.04805	0.0290736		0.0541974	0.104296	0.0618395	0.0794358	0.0817795	0.0876991	0.0561111	0.0696988	0.0675238	0.128983	0.0471195	0.0972944	0.066658	0.0459969	0.0648982	0.101611	0.0712247	0.0698957	0.0621968	0.0478432	0.12961	0.102523	0.0602876	0.0480064
cg25760229	CACNA1H	16	1143596	0.0253182	0.0159627	0.0194789	0.0155632	0.0137093	0.0134938	0.0466827	0.023143	0.0254181	0.0337368		0.0326203	0.0235477	0.0282836	0.0264045	0.0151341	0.00936013	0.0139245	0.0151874	0.0338477	0.011762		0.0665056	0.10437	0.0513921	0.078369	0.0840331	0.0900309	0.0555901	0.179392	0.0532673	0.0714816	0.0772509	0.0532894	0.0532847	0.0428716	0.0741688	0.066101	0.055329	0.0891785	0.0543788	0.26396	0.0907646	0.0738884	0.0710415	0.160063
cg27661264	GNAS	20	56861133	0.279749	0.387849	0.401626	0.279487	0.262771	0.345174	0.427749	0.380433	0.357385	0.43957		0.266877	0.295485	0.373964	0.476301	0.373292	0.296978	0.254852	0.337586	0.372306	0.331174		0.463035	0.418097	0.539673	0.396653	0.478364	0.486129	0.42201	0.516001	0.416368	0.485161	0.522559	0.396878	0.490185	0.493691	0.443754	0.285066	0.445355	0.382213	0.487361	0.47012	0.420259	0.469739	0.396497	0.36326
[truncated: 72 more columns]
